# Supplementary material for: CLC-Pred 2.0: A Freely Available Web Application for In Silico Prediction of Human Cell Line Cytotoxicity and Molecular Mechanisms of Action for Druglike Compounds
Source: MDPI journal article supplement (doi:10.3390/ijms24021689), 2023-01-14
Supplement: s1 [file s1]

**Table S2:** The information related with description of the training set based on DTP NCI60 data and accuracy of cytotoxicity prediction for NCI60 cell lines.

| DTP NCI60 cell-line | Tissue of origin       | Age | Sex | Epithelial | Histology                                                                            | Ploidy                                  | p53 | Number (1 nM) | AUC LOO CV (1 nM) | AUC 20-Fold CV (1 nM) | Number (10 nM) | AUC LOO CV (10 nM) | AUC 20-Fold CV (10 nM) | Number (100 nM) | AUC LOO CV (100 nM) | AUC 20-Fold CV (100 nM) |
|---------------------|------------------------|-----|-----|------------|--------------------------------------------------------------------------------------|-----------------------------------------|-----|---------------|-------------------|-----------------------|----------------|--------------------|------------------------|-----------------|---------------------|-------------------------|
| BR:BT-549           | Breast                 | 72  | F   | yes        | Papillary infiltrating ductal carcinoma-mammary gland; breast                        | 3n+/-, Near-triploid 69+/- (58-80)      | NA  | 37            | 0.973             | 0.973                 | 284            | 0.904              | 0.902                  | 918             | 0.871               | 0.868                   |
| BR:HS 578T          | Breast                 | 74  | F   | yes        | Carcinosarcoma-mammary gland; breast                                                 | 2n+, Hyperdiploid (47-57)               | MT  | 57            | 0.962             | 0.955                 | 379            | 0.877              | 0.876                  | 1117            | 0.855               | 0.853                   |
| BR:MCF7             | Breast                 | 69  | F   | yes        | Adenocarcinoma-mammary gland; breast; metastatic site: pleural effusion;             | 3n-, Hypotriploid (58-68)               | WT  | 74            | 0.913             | 0.904                 | 739            | 0.905              | 0.904                  | 1921            | 0.874               | 0.874                   |
| BR:MDA-MB-231       | Breast                 | 51  | F   | yes        | Adenocarcinoma-mammary gland; breast; epithelial; metastatic site: pleural effusion; | 2n+, Hyperdiploid (47-57)               | MT  | 45            | 0.937             | 0.932                 | 291            | 0.918              | 0.918                  | 961             | 0.878               | 0.878                   |
| BR:T-47D            | Breast                 | 54  | F   | yes        | infiltrating ductal carcinoma                                                        | 2n+, Hyperdiploid (47-57)               | MT  | 46            | 0.908             | 0.909                 | 364            | 0.911              | 0.909                  | 1058            | 0.874               | 0.874                   |
| CNS:SF-268          | Central nervous system | 24  | F   | no         | Glioblastoma, ud                                                                     | 2n+, Hyperdiploid (47-57)               | MT  | 44            | 0.956             | 0.956                 | 410            | 0.920              | 0.920                  | 1283            | 0.888               | 0.888                   |
| CNS:SF-295          | Central nervous system | 67  | F   | no         | Glioblastoma, ud                                                                     | 5n+/-, Near-pentaploid 115+/- (104-126) | MT  | 62            | 0.966             | 0.964                 | 499            | 0.905              | 0.905                  | 1529            | 0.874               | 0.873                   |
| CNS:SF-539          | Central nervous system | 34  | F   | no         | Glial cell neoplasm                                                                  | 4n+/-, Near-tetraploid 92+/- (81-103)   | WT  | 55            | 0.955             | 0.948                 | 519            | 0.892              | 0.891                  | 1489            | 0.870               | 0.870                   |
| CNS:SNB-19          | Central nervous system | 47  | M   | no         | Glioblastoma, ud                                                                     | 3n+/-, Near-triploid 69+/- (58-80)      | MT  | 43            | 0.958             | 0.950                 | 368            | 0.906              | 0.906                  | 1087            | 0.882               | 0.881                   |
| CNS:SNB-75          | Central nervous system | NA  | F   | no         | Astrocytoma                                                                          | 2n+, Hyperdiploid (47-57)               | MT  | 63            | 0.936             | 0.930                 | 491            | 0.856              | 0.854                  | 1506            | 0.851               | 0.851                   |
| CNS:U251            | Central nervous system | 75  | M   | no         | Glioblastoma,ud                                                                      | 2n+, Hyperdiploid (47-57)               | MT  | 59            | 0.963             | 0.957                 | 530            | 0.913              | 0.913                  | 1565            | 0.880               | 0.880                   |
| CO:COLO 205         | Colon                  | 70  | M   | yes        | Adenocarcinoma                                                                       | 3n, Triploid (69)                       | MT  | 50            | 0.961             | 0.962                 | 497            | 0.915              | 0.913                  | 1498            | 0.881               | 0.880                   |
| CO:HCC-2998         | Colon                  | NA  | NA  | yes        | carcinoma                                                                            | 2n+/-, Near-diploid 46+/-               | MT  | 38            | 0.948             | 0.949                 | 381            | 0.890              | 0.888                  | 1150            | 0.868               | 0.868                   |

|              |                     |    |    |     |                                       |                                       |    |    |       |       |     |       |       |      |       |       |
|--------------|---------------------|----|----|-----|---------------------------------------|---------------------------------------|----|----|-------|-------|-----|-------|-------|------|-------|-------|
|              |                     |    |    |     |                                       | (35-57)                               |    |    |       |       |     |       |       |      |       |       |
| CO:HCT-116   | Colon               | NA | M  | yes | carcinoma-vpd                         | 2n-, Hypodiploid (35-45)              | NA | 72 | 0.958 | 0.952 | 621 | 0.911 | 0.910 | 1858 | 0.867 | 0.865 |
| CO:HCT-15    | Colon               | NA | NA | yes | Adenocarcinoma p/md                   | 2n+/-, Near-diploid 46+/- (35-57)     | NA | 31 | 0.955 | 0.950 | 336 | 0.898 | 0.896 | 1255 | 0.874 | 0.873 |
| CO:HT29      | Colon               | 44 | F  | yes | Adenocarcinoma-md                     | 3n+/-, Near-triploid 69+/- (58-80)    | MT | 54 | 0.952 | 0.953 | 564 | 0.916 | 0.915 | 1573 | 0.886 | 0.884 |
| CO:KM12      | Colon               | NA | NA | yes | Adenocarcinome-pd                     | 2n+/-, Near-diploid 46+/- (35-57)     | MT | 55 | 0.956 | 0.944 | 443 | 0.912 | 0.911 | 1451 | 0.881 | 0.880 |
| CO:SW-620    | Colon               | 51 | M  | yes | Carcinoma-ud                          | 2n+/-, Near-diploid 46+/- (35-57)     | MT | 61 | 0.963 | 0.959 | 569 | 0.901 | 0.900 | 1687 | 0.873 | 0.872 |
| LC:A549/ATCC | Non-Small Cell Lung | 58 | M  | yes | Adenocarcinoma-p/md                   | 3n+/-, Near-triploid 69+/- (58-80)    | WT | 47 | 0.961 | 0.960 | 437 | 0.918 | 0.918 | 1371 | 0.883 | 0.881 |
| LC:EKVX      | Non-Small Cell Lung | NA | M  | yes | Adenocarcinoma-md                     | 3n+/-, Near-triploid 69+/- (58-80)    | MT | 29 | 0.931 | 0.932 | 219 | 0.900 | 0.900 | 804  | 0.853 | 0.850 |
| LC:HOP-62    | Non-Small Cell Lung | 60 | F  | yes | adenocarcinoma-ud                     | 4n+, Hypertetraploid (93-103)         | MT | 54 | 0.961 | 0.962 | 420 | 0.908 | 0.907 | 1344 | 0.881 | 0.880 |
| LC:HOP-92    | Non-Small Cell Lung | 62 | M  | yes | Large cell-ud                         | 4n+/-, Near-tetraploid 92+/- (81-103) | MT | 34 | 0.936 | 0.919 | 398 | 0.822 | 0.819 | 1316 | 0.829 | 0.829 |
| LC:NCI-H226  | Non-Small Cell Lung | NA | M  | yes | Squamous cell carcinoma-vpd           | 3n, Triploid (69)                     | MT | 34 | 0.970 | 0.968 | 305 | 0.873 | 0.874 | 1088 | 0.867 | 0.866 |
| LC:NCI-H23   | Non-Small Cell Lung | NA | M  | yes | Adenocarcinoma-ud                     | 2n+, Hyperdiploid (47-57)             | MT | 45 | 0.950 | 0.939 | 436 | 0.914 | 0.914 | 1374 | 0.882 | 0.881 |
| LC:NCI-H322M | Non-Small Cell Lung | 52 | M  | yes | Small cell Bronchioalveolar Carcinoma | 2n+/-, Near-diploid 46+/- (35-57)     | MT | 39 | 0.925 | 0.915 | 288 | 0.921 | 0.918 | 994  | 0.880 | 0.877 |
| LC:NCI-H460  | Non-Small Cell Lung | NA | M  | yes | Large Cell Carcinoma-ud               | 2n+/-, Near-diploid 46+/- (35-57)     | WT | 69 | 0.947 | 0.939 | 679 | 0.912 | 0.913 | 1843 | 0.874 | 0.873 |
| LC:NCI-H522  | Non-Small Cell Lung | NA | M  | yes | Adenocarcinoma-vpd                    | 2n+/-, Near-diploid 46+/- (35-57)     | MT | 69 | 0.974 | 0.970 | 604 | 0.885 | 0.884 | 1824 | 0.866 | 0.864 |
| LE:CCRF-CEM  | Leukemia            | 4  | F  | no  | ALL                                   | 2n+/-, Near-diploid 46+/- (35-57)     | MT | 68 | 0.937 | 0.935 | 755 | 0.868 | 0.867 | 2131 | 0.825 | 0.824 |
| LE:HL-60(TB) | Leukemia            | 36 | F  | no  | Pro myelocytic leukemia               | 2n+/-, Near-diploid 46+/- (35-57)     | MT | 78 | 0.955 | 0.953 | 724 | 0.844 | 0.843 | 2047 | 0.819 | 0.819 |

|                |          |    |    |     |                                                                                  |                                       |    |    |       |       |     |       |       |      |       |       |
|----------------|----------|----|----|-----|----------------------------------------------------------------------------------|---------------------------------------|----|----|-------|-------|-----|-------|-------|------|-------|-------|
| LE:K-562       | Leukemia | 53 | F  | no  | CML                                                                              | 3n-, Hypotriploid (58-68)             | MT | 71 | 0.924 | 0.922 | 691 | 0.899 | 0.898 | 1974 | 0.857 | 0.856 |
| LE:MOLT-4      | Leukemia | 19 | M  | no  | ALL (cells were taken when patient was in relapse)                               | 4n, Tetraploid (92)                   | WT | 64 | 0.971 | 0.965 | 704 | 0.898 | 0.897 | 1910 | 0.863 | 0.863 |
| LE:RPMI-8226   | Leukemia | 61 | M  | no  | Myeloma                                                                          | 3n-, Hypotriploid (58-68)             | WT | 68 | 0.961 | 0.953 | 582 | 0.883 | 0.882 | 1665 | 0.846 | 0.845 |
| LE:SR          | Leukemia | 11 | M  | no  | Lymphoma                                                                         | 2n+/-, Near-diploid 46+/- (35-57)     | NA | 94 | 0.921 | 0.921 | 893 | 0.862 | 0.861 | 2425 | 0.828 | 0.827 |
| ME:LOX IMVI    | Melanoma | 58 | M  | no  | Malignant amelanotic melanoma                                                    | 3n+/-, Near-triploid 69+/- (58-80)    | WT | 68 | 0.969 | 0.964 | 582 | 0.900 | 0.899 | 1740 | 0.865 | 0.864 |
| ME:M14         | Melanoma | NA | NA | no  | Melanotic melanoma                                                               | 3n+/-, Near-triploid 69+/- (58-80)    | MT | 56 | 0.950 | 0.941 | 479 | 0.909 | 0.909 | 1504 | 0.875 | 0.874 |
| ME:MALME-3M    | Melanoma | 43 | M  | no  | Malignant melanotic melanoma                                                     | 4n+/-, Near-tetraploid 92+/- (81-103) | WT | 36 | 0.908 | 0.894 | 339 | 0.892 | 0.892 | 1164 | 0.866 | 0.866 |
| ME:MDA-MB-435  | Melanoma | 31 | F  | no  | Ductal carcinoma-mammary gland; breast; duct; metastatic site: pleural effusion; | 2n+, Hyperdiploid (47-57)             | MT | 82 | 0.944 | 0.938 | 564 | 0.908 | 0.907 | 1625 | 0.870 | 0.869 |
| ME:MDA-N       | Melanoma | 31 | F  | no  | Ductal carcinoma-mammary gland; breast; duct; metastatic site: pleural effusion; | NA                                    | MT | 60 | 0.939 | 0.932 | 289 | 0.941 | 0.942 | 678  | 0.910 | 0.909 |
| ME:SK-MEL-2    | Melanoma | 60 | M  | no  | Malignant melanotic melanoma                                                     | 4n-, Hypotetraploid (81-91)           | WT | 39 | 0.968 | 0.968 | 329 | 0.909 | 0.907 | 998  | 0.882 | 0.880 |
| ME:SK-MEL-28   | Melanoma | 51 | M  | no  | Malignant melanotic melanoma                                                     | 4n-, Hypotetraploid (81-91)           | MT | 29 | 0.967 | 0.962 | 217 | 0.909 | 0.907 | 755  | 0.878 | 0.878 |
| ME:SK-MEL-5    | Melanoma | 24 | F  | no  | Malignant melanotic melanoma                                                     | 4n+, Hypertetraploid (93-103)         | WT | 56 | 0.971 | 0.966 | 464 | 0.909 | 0.910 | 1525 | 0.875 | 0.874 |
| ME:UACC-257    | Melanoma | NA | NA | no  | Melanotic melanoma                                                               | 3n+, Hypertriploid (70-80)            | WT | 28 | 0.972 | 0.971 | 269 | 0.896 | 0.892 | 936  | 0.875 | 0.875 |
| ME:UACC-62     | Melanoma | NA | NA | no  | Melanotic melanoma                                                               | 3n+/-, Near-triploid 69+/- (58-80)    | WT | 58 | 0.957 | 0.953 | 502 | 0.909 | 0.909 | 1573 | 0.872 | 0.871 |
| OV:IGROV1      | Ovarian  | 47 | F  | yes | Cystadenocarcinoma-pd                                                            | 4n+/-, Near-tetraploid 92+/- (81-103) | MT | 35 | 0.950 | 0.949 | 443 | 0.908 | 0.906 | 1411 | 0.871 | 0.871 |
| OV:NCI/ADR-RES | Ovarian  | NA | F  | yes | Adenocarcinoma                                                                   | 2n+/-, Near-diploid 46+/- (35-57)     | MT | 28 | 0.877 | 0.868 | 264 | 0.903 | 0.900 | 981  | 0.886 | 0.884 |

|            |          |    |   |     |                                                                                                                                               |                                       |    |    |       |       |     |       |       |      |       |       |
|------------|----------|----|---|-----|-----------------------------------------------------------------------------------------------------------------------------------------------|---------------------------------------|----|----|-------|-------|-----|-------|-------|------|-------|-------|
| OV:OVCAR-3 | Ovarian  | 60 | F | yes | Adenocarcinoma-md                                                                                                                             | 3n+/-, Near-triploid 69+/- (58-80)    | MT | 56 | 0.948 | 0.938 | 458 | 0.907 | 0.904 | 1454 | 0.868 | 0.867 |
| OV:OVCAR-4 | Ovarian  | 42 | F | yes | Adenocarcinoma-md                                                                                                                             | 3n+/-, Near-triploid 69+/- (58-80)    | WT | 22 | 0.959 | 0.960 | 213 | 0.917 | 0.916 | 829  | 0.861 | 0.859 |
| OV:OVCAR-5 | Ovarian  | 67 | F | yes | Adenocarcinoma-wd                                                                                                                             | 2n+, Hyperdiploid (47-57)             | MT | 26 | 0.930 | 0.929 | 195 | 0.906 | 0.906 | 819  | 0.880 | 0.877 |
| OV:OVCAR-8 | Ovarian  | 64 | F | yes | Carcinoma-ud                                                                                                                                  | 2n+, Hyperdiploid (47-57)             | MT | 41 | 0.961 | 0.948 | 436 | 0.908 | 0.906 | 1347 | 0.884 | 0.882 |
| OV:SK-OV-3 | Ovarian  | 64 | F | yes | Adenocarcinoma-vpd                                                                                                                            | 4n+/-, Near-tetraploid 92+/- (81-103) | NA | 33 | 0.909 | 0.910 | 337 | 0.887 | 0.887 | 1135 | 0.883 | 0.882 |
| PR:DU-145  | Prostate | 69 | M | yes | prostate; metastatic site: brain; carcinoma (patient with metastatic carcinoma of the prostate and a 3 year history of lymphocytic leukemia.) | 3n+/-, Near-triploid 69+/- (58-80)    | NA | 63 | 0.953 | 0.946 | 416 | 0.917 | 0.917 | 1218 | 0.876 | 0.875 |
| PR:PC-3    | Prostate | 62 | M | yes | Adenocarcinoma-prostate; metastatic site: bone;                                                                                               | 4n, Tetraploid (92)                   | MT | 57 | 0.943 | 0.936 | 428 | 0.907 | 0.907 | 1280 | 0.881 | 0.880 |
| RE:786-0   | Renal    | 58 | M | yes | Adenocarcinoma                                                                                                                                | 4n+/-, Near-tetraploid 92+/- (81-103) | MT | 51 | 0.939 | 0.939 | 457 | 0.907 | 0.905 | 1384 | 0.878 | 0.876 |
| RE:A498    | Renal    | 52 | F | yes | Adenocarcinoma                                                                                                                                | 3n, Triploid (69)                     | WT | 34 | 0.954 | 0.953 | 389 | 0.864 | 0.858 | 1453 | 0.861 | 0.860 |
| RE:ACHN    | Renal    | 22 | M | yes | Renal cell carcinoma-p/md                                                                                                                     | 2n+/-, Near-diploid 46+/- (35-57)     | WT | 45 | 0.936 | 0.934 | 464 | 0.908 | 0.908 | 1428 | 0.883 | 0.883 |
| RE:CAKI-1  | Renal    | 49 | M | yes | Clear cell carcinoma                                                                                                                          | 3n, Triploid (69)                     | WT | 44 | 0.922 | 0.924 | 432 | 0.888 | 0.887 | 1356 | 0.866 | 0.864 |
| RE:RXF 393 | Renal    | 54 | M | yes | hypernephroma-pd                                                                                                                              | 3n+/-, Near-triploid 69+/- (58-80)    | MT | 49 | 0.953 | 0.952 | 414 | 0.866 | 0.866 | 1433 | 0.849 | 0.848 |
| RE:SN12C   | Renal    | 43 | M | yes | Renal cell carcinoma-pd                                                                                                                       | 3n, Triploid (69)                     | MT | 39 | 0.970 | 0.959 | 415 | 0.903 | 0.901 | 1286 | 0.878 | 0.877 |
| RE:TK-10   | Renal    | 43 | M | yes | Renal Spindle cell carcinoma                                                                                                                  | 4n, Tetraploid (92)                   | MT | 23 | 0.912 | 0.915 | 173 | 0.873 | 0.874 | 771  | 0.866 | 0.866 |
| RE:UO-31   | Renal    | NA | F | yes | Renal cell carcinoma-vpd                                                                                                                      | 2n+/-, Near-diploid 46+/- (35-57)     | WT | 27 | 0.854 | 0.855 | 273 | 0.860 | 0.861 | 1128 | 0.853 | 0.853 |

**Number** – number of active compounds; **LOO CV** – leave-one-out cross-validation; **20-Fold CV** – 20-fold cross-validation.
