# Supplementary material for: CLC-Pred 2.0: A Freely Available Web Application for In Silico Prediction of Human Cell Line Cytotoxicity and Molecular Mechanisms of Action for Druglike Compounds
Source: MDPI journal article supplement (doi:10.3390/ijms24021689), 2023-01-14
Supplement: s1 [file s1]

**Table S1:** The information related with description of the training set based on ChEMBL and PubChem data and accuracy of cytotoxicity prediction for appropriate cell lines.

| ActivityType | Cell line full name (Disease)                                     | Tissue/Organ                                 | Type           | Number | IAP, LOO | IAP, 20-Fold |
|--------------|-------------------------------------------------------------------|----------------------------------------------|----------------|--------|----------|--------------|
| 143B         | Osteosarcoma                                                      | Bone                                         | Osteosarcoma   | 45     | 0.931    | 0.920        |
| 184B5        | Epithelial mammary gland cells                                    | Breast                                       | Normal         | 3      | 0.999    | 0.999        |
| 1A9          | Ovarian adenocarcinoma                                            | Ovary                                        | Adenocarcinoma | 93     | 0.991    | 0.990        |
| 1A9/ptx-10   | Ovarian adenocarcinoma                                            | Ovary                                        | Adenocarcinoma | 36     | 0.991    | 0.991        |
| 1A9/ptx-22   | Ovarian adenocarcinoma                                            | Ovary                                        | Adenocarcinoma | 24     | 0.995    | 0.994        |
| 2008         | Ovarian adenocarcinoma                                            | Ovary                                        | Adenocarcinoma | 4      | 0.863    | 0.866        |
| 4T1          | Epithelial mammary gland cells                                    | Breast                                       | Normal         | 37     | 0.887    | 0.885        |
| 518A2        | Melanoma                                                          | Derived from metastatic site: Not specified. | Melanoma       | 38     | 0.999    | 0.999        |
| 5637         | Urothelial bladder carcinoma                                      | Urinary tract                                | Carcinoma      | 167    | 0.839    | 0.838        |
| 786-0        | Renal carcinoma                                                   | Kidney                                       | Carcinoma      | 981    | 0.877    | 0.873        |
| 833K         | Testicular embryonal carcinoma                                    | Testicle                                     | Carcinoma      | 16     | 0.992    | 0.993        |
| 8505C        | Thyroid gland undifferentiated (anaplastic) carcinoma             | Thyroid                                      | Carcinoma      | 129    | 0.832    | 0.833        |
| A172         | Glioblastoma                                                      | Brain                                        | Glioblastoma   | 6      | 0.807    | 0.810        |
| A-375        | Malignant melanoma                                                | Skin                                         | Melanoma       | 1407   | 0.931    | 0.930        |
| A-427        | Lung carcinoma                                                    | Lung                                         | Carcinoma      | 210    | 0.872    | 0.866        |
| A-431        | Epidermoid carcinoma                                              | Skin                                         | Carcinoma      | 1547   | 0.937    | 0.935        |
| A121         | Ovarian carcinoma                                                 | Ovary                                        | Carcinoma      | 80     | 1.000    | 1.000        |
| A2058        | Melanoma                                                          | Skin                                         | Melanoma       | 109    | 0.859    | 0.851        |
| A2780        | Ovarian carcinoma                                                 | Ovary                                        | Carcinoma      | 2930   | 0.931    | 0.930        |
| A2780/T      | Putative Paclitaxel-resistant ovarian endometrioid adenocarcinoma | Ovary                                        | Adenocarcinoma | 29     | 0.959    | 0.959        |
| A2780S       | Ovarian endometrioid adenocarcinoma                               | Ovary                                        | Adenocarcinoma | 13     | 0.851    | 0.855        |
| A2780cisR    | Cisplatin-resistant ovarian carcinoma                             | Ovary                                        | Carcinoma      | 3      | 0.838    | 0.843        |
| A498         | Renal carcinoma                                                   | Kidney                                       | Carcinoma      | 1046   | 0.892    | 0.891        |
| A549         | Lung carcinoma                                                    | Lung                                         | Carcinoma      | 15040  | 0.856    | 0.856        |
| A549/CDDP    | Putative Taxol-resistant lung adenocarcinoma                      | Lung                                         | Adenocarcinoma | 23     | 0.999    | 0.999        |
| A549/TR      | Putative Cisplatin-resistant lung adenocarcinoma                  | Lung                                         | Adenocarcinoma | 26     | 0.959    | 0.959        |
| ACHN         | Papillary renal carcinoma                                         | Kidney                                       | Carcinoma      | 1582   | 0.901    | 0.899        |
| ADR5000      | Childhood T acute lymphoblastic leukemia                          | Blood                                        | Leukemia       | 11     | 0.911    | 0.913        |
| AG1523       | Fibroblast                                                        | Fibroblast                                   | Normal         | 25     | 0.962    | 0.961        |
| AGS          | Gastric adenocarcinoma                                            | Stomach                                      | Adenocarcinoma | 310    | 0.875    | 0.872        |
| ARPE-19      | Retinal pigmented epithelium                                      | Eye; Retina                                  | Normal         | 48     | 1.000    | 1.000        |
| ASPC1        | Pancreatic ductal adenocarcinoma                                  | Pancreas                                     | Adenocarcinoma | 234    | 0.901    | 0.894        |
| ATH-8        | HTLV-I-infected human T-cell line                                 | Peripheral blood                             | Normal         | 3      | 0.964    | 0.965        |
| BE           | Colon adenocarcinoma                                              | Colon                                        | Adenocarcinoma | 17     | 0.988    | 0.988        |
| BE-NQ        | Colon adenocarcinoma                                              | Colon                                        | Adenocarcinoma | 15     | 1.000    | 1.000        |
| BEAS-2B      | Epithelial cells                                                  | bronchial epithelium                         | Normal         | 9      | 1.000    | 0.999        |
| BGC-823      | Stomach adenocarcinoma                                            | Stomach                                      | Adenocarcinoma | 92     | 0.969    | 0.969        |
| BHK-21       | Fibroblast                                                        | kidney                                       | Normal         | 15     | 0.905    | 0.909        |
| BJ           | Foreskin fibroblast                                               | Foreskin                                     | Normal         | 150    | 0.955    | 0.955        |
| BT-474       | Breast ductal carcinoma                                           | Breast                                       | Carcinoma      | 625    | 0.941    | 0.941        |
| BT-549       | Breast ductal carcinoma                                           | Breast                                       | Carcinoma      | 839    | 0.882    | 0.880        |

|                   |                                                          |                  |                |      |       |       |
|-------------------|----------------------------------------------------------|------------------|----------------|------|-------|-------|
| BV-2              | Murine microglial cell line                              | Microglial cells | Normal         | 44   | 0.962 | 0.961 |
| BXPC-3            | Pancreatic adenocarcinoma                                | Pancreas         | Adenocarcinoma | 485  | 0.917 | 0.916 |
| Bcap37            | Breast adenocarcinoma                                    | Breast           | Adenocarcinoma | 109  | 0.979 | 0.979 |
| Bel-7402          | Hepatoma                                                 | Liver            | Hepatoma       | 133  | 0.970 | 0.967 |
| Bel7402/5-FU      | Human papillomavirus-related endocervical adenocarcinoma | Uterus; Cervix   | Adenocarcinoma | 28   | 0.966 | 0.966 |
| C180-13S          | Ovarian carcinoma                                        | Ovary            | Carcinoma      | 11   | 0.999 | 0.999 |
| C6                | Glioma                                                   | Brain            | Glioma         | 8    | 0.980 | 0.761 |
| C8166             | Leukemic T-cells                                         | Blood            | Leukemia       | 105  | 0.839 | 0.841 |
| CA46              | Burkitts Lymphoma                                        | Blood            | Lymphoma       | 98   | 0.810 | 0.813 |
| CAKI-1            | Kidney carcinoma                                         | Kidney           | Carcinoma      | 979  | 0.880 | 0.877 |
| CAKI-2            | Kidney carcinoma                                         | Kidney           | Carcinoma      | 5    | 0.829 | 0.834 |
| CAL-27            | Squamous Cell Carcinoma                                  | Tongue           | Carcinoma      | 113  | 0.854 | 0.859 |
| CAL-51            | Breast carcinoma                                         | Breast           | Carcinoma      | 117  | 0.824 | 0.821 |
| CAPAN-1           | Pancreas Adenocarcinoma                                  | Pancreas         | Adenocarcinoma | 149  | 0.889 | 0.892 |
| CCD-18Co          | Fibroblasts                                              | Colon            | Normal         | 261  | 0.994 | 0.994 |
| CCRF-CEM          | Childhood T acute lymphoblastic leukemia                 | Blood            | Leukemia       | 3625 | 0.913 | 0.912 |
| CCRF-CEM/VCR-1000 | T-cell leukaemia                                         | Blood            | Leukemia       | 62   | 0.989 | 0.990 |
| CCRF-HSB-2        | Childhood T acute lymphoblastic leukemia                 | Blood            | Leukemia       | 23   | 0.941 | 0.942 |
| CCRF-SB           | Childhood T acute lymphoblastic leukemia                 | Blood            | Leukemia       | 91   | 0.967 | 0.967 |
| CEM-DNR           | Childhood T acute lymphoblastic leukemia                 | Blood            | Leukemia       | 12   | 0.951 | 0.952 |
| CEM-SS            | Childhood T acute lymphoblastic leukemia                 | Blood            | Leukemia       | 142  | 0.984 | 0.985 |
| CEM-c113          | Childhood T acute lymphoblastic leukemia                 | Blood            | Leukemia       | 4    | 1.000 | 1.000 |
| CEM/C2            | Camptothecin-resistant CEM                               | Blood            | Leukemia       | 17   | 0.934 | 0.937 |
| CFPAC-1           | Pancreatic carcinoma                                     | Pancreas         | Carcinoma      | 84   | 0.905 | 0.906 |
| CL1-0             | Lung adenocarcinoma                                      | Lung             | Adenocarcinoma | 4    | 0.830 | 0.832 |
| CL97              | Lung adenocarcinoma                                      | Lung             | Adenocarcinoma | 6    | 0.872 | 0.880 |
| CNE               | Hybrid cell line                                         | Hybrid           | Normal         | 4    | 0.992 | 0.992 |
| CNE-2             | Hybrid cell line                                         | Hybrid           | Normal         | 4    | 0.990 | 0.991 |
| CNE2Z             | Hybrid cell line                                         | Hybrid           | Normal         | 3    | 1.000 | 1.000 |
| COLO-205          | Colorectal Adenocarcinoma                                | Colon            | Adenocarcinoma | 1700 | 0.901 | 0.899 |
| COLO-320          | Colon adenocarcinoma                                     | Colon            | Adenocarcinoma | 10   | 0.999 | 0.998 |
| COLO-320DM        | Colorectal Adenocarcinoma                                | Colon            | Adenocarcinoma | 64   | 0.994 | 0.980 |
| COLO357           | Pancreatic adenosquamous carcinoma                       | Pancreas         | Carcinoma      | 11   | 1.000 | 1.000 |
| COR-L23           | Lung large cell carcinoma                                | Lung             | Carcinoma      | 115  | 0.834 | 0.836 |
| CPT30             | Nasopharyngeal carcinoma                                 | Head and neck    | Carcinoma      | 7    | 1.000 | 1.000 |
| CRL-7065          | Fibroblast                                               | Skin             | Normal         | 9    | 0.934 | 0.935 |
| CT26              | Mouse colon adenocarcinoma                               | Colon            | Adenocarcinoma | 15   | 0.869 | 0.871 |
| CWR22R            | Prostate carcinoma epithelial cell line                  | Prostate         | Carcinoma      | 303  | 0.911 | 0.907 |
| Cac-2             | Carcinoma Adenoide Cistico 2                             | Adenoide         | Carcinoma      | 345  | 0.925 | 0.922 |
| Caco-2            | Colon adenocarcinoma                                     | Colon            | Adenocarcinoma | 47   | 0.898 | 0.899 |
| Calu-1            | Epidermoid Carcinoma                                     | Lung             | Carcinoma      | 85   | 0.851 | 0.853 |
| Caov-3            | Ovary Adenocarcinoma                                     | Ovary            | Adenocarcinoma | 7    | 0.890 | 0.892 |
| Capan-2           | Pancreas Adenocarcinoma                                  | Pancreas         | Adenocarcinoma | 13   | 0.895 | 0.893 |
| Cav-3             | Transformed cell line                                    | Kidney           | Normal         | 57   | 0.936 | 0.939 |

|            |                                                             |                                       |                 |      |       |       |
|------------|-------------------------------------------------------------|---------------------------------------|-----------------|------|-------|-------|
| Col2       | Colon carcinoma                                             | Colon                                 | Carcinoma       | 3    | 1.000 | 1.000 |
| CuFi-1     | Cystic Fibrosis                                             | Lung; Bronchus;<br>Epithelium         | Normal          | 3    | 1.000 | 1.000 |
| D54        | Glioblastoma                                                | Brain                                 | Glioblastoma    | 4    | 0.995 | 0.995 |
| DAN-G      | Human pancreas adenocarcinoma<br>cell line                  | Pancreas                              | Adenocarcinoma  | 54   | 0.962 | 0.955 |
| DLD-1      | Colon adenocarcinoma                                        | Colon                                 | Adenocarcinoma  | 724  | 0.949 | 0.949 |
| DMS-114    | Lung carcinoma                                              | Lung                                  | Carcinoma       | 124  | 0.834 | 0.837 |
| DO4        | Melanoma                                                    | Skin                                  | Melanoma        | 6    | 0.999 | 0.999 |
| DU-145     | Prostate carcinoma                                          | Prostate                              | Carcinoma       | 4562 | 0.896 | 0.896 |
| DU-4475    | Breast Carcinoma                                            | Breast                                | Carcinoma       | 125  | 0.802 | 0.800 |
| Daoy       | Desmoplastic Cerebellar<br>Medulloblastoma                  | Brain                                 | Medulloblastoma | 21   | 0.908 | 0.909 |
| Daudi      | Burkitts Lymphoma                                           | Blood                                 | Lymphoma        | 31   | 0.990 | 0.990 |
| Detroit562 | Pharyngeal Carcinoma                                        | Pharynx                               | Carcinoma       | 5    | 0.989 | 0.989 |
| EA.hy 926  | Somatic cell hybrid                                         | Hybrid                                | Normal          | 20   | 0.968 | 0.968 |
| EBC-1      | Lung squamous cell carcinoma                                | Lung                                  | Carcinoma       | 19   | 0.944 | 0.945 |
| ECa-109    | Esophageal squamous cell<br>carcinoma                       | Esophagus                             | Carcinoma       | 94   | 0.961 | 0.962 |
| EJ         | Endometrial adenocarcinoma                                  | Endometrium                           | Adenocarcinoma  | 9    | 1.000 | 1.000 |
| EKVX       | Non-small cell lung carcinoma                               | Lung                                  | Carcinoma       | 522  | 0.841 | 0.841 |
| EOL1       | Chronic eosinophilic leukemia, not<br>otherwise specified   | Blood                                 | Leukemia        | 167  | 0.861 | 0.859 |
| FHC        | Epithelial cell                                             | Large intestine; Colon                | Normal          | 10   | 0.820 | 0.821 |
| FaDu       | Hypopharyngeal squamous<br>carcinoma                        | Upper aerodigestive<br>tract          | Carcinoma       | 254  | 0.902 | 0.901 |
| G-361      | Melanoma                                                    | Skin                                  | Melanoma        | 191  | 0.890 | 0.882 |
| G55T2      | Anaplastic astrocytoma                                      | Brain                                 | Astrocytoma     | 11   | 1.000 | 1.000 |
| GC3/Cl     | Colorectal carcinoma                                        | Colon                                 | Carcinoma       | 5    | 1.000 | 1.000 |
| GC3/M      | Colorectal carcinoma                                        | Colon                                 | Carcinoma       | 12   | 1.000 | 1.000 |
| GC3/MTK-   | Colorectal carcinoma                                        | Colon                                 | Carcinoma       | 13   | 1.000 | 1.000 |
| GES1       | Gastric epithelial cell line                                | Stomach                               | Normal          | 33   | 0.963 | 0.964 |
| GHOSTCXCR4 | Osteosarcoma                                                | Bone                                  | Sarcoma         | 3    | 1.000 | 1.000 |
| GIST430    | Gastrointestinal stromal tumor                              | Intestine                             | Carcinoma       | 5    | 0.820 | 0.823 |
| GIST48     | Gastrointestinal stromal tumor                              | Intestine                             | Carcinoma       | 6    | 0.805 | 0.806 |
| GIST882    | Gastrointestinal stromal tumor                              | Intestine                             | Carcinoma       | 6    | 0.824 | 0.828 |
| GISTT1     | Gastrointestinal stromal tumor                              | Intestine                             | Carcinoma       | 32   | 0.942 | 0.941 |
| GLC4       | Lung small cell carcinoma                                   | Lung                                  | Carcinoma       | 10   | 1.000 | 1.000 |
| GM892A     | Immortal human peripheral vein-<br>derived B cell line cell | Blood                                 | Normal          | 4    | 1.000 | 1.000 |
| Granta-519 | Mantle cell lymphoma                                        | Blood                                 | Lymphoma        | 23   | 0.993 | 0.993 |
| H2981      | Lung carcinoma                                              | Lung                                  | Carcinoma       | 11   | 0.989 | 0.989 |
| H322       | Lung carcinoma                                              | Lung                                  | Carcinoma       | 6    | 1.000 | 1.000 |
| H9         | T-lymphoid                                                  | Haematopoietic and<br>lymphoid tissue | Leukemia        | 123  | 0.872 | 0.873 |
| H9c2       | Rat DB1X heart myoblast cell line                           | Heart                                 | Myoblast        | 9    | 0.897 | 0.787 |
| HA22T      | Hepatocellular carcinoma                                    | Liver                                 | Carcinoma       | 21   | 0.946 | 0.944 |
| HBL        | Melanoma                                                    | Skin                                  | Melanoma        | 10   | 0.939 | 0.939 |
| HBL-100    | Human mammary gland breast<br>carcinoma                     | Breast                                | Carcinoma       | 21   | 0.957 | 0.957 |
| HCC1806    | Acantholytic Squamous Cell<br>Carcinoma                     | Breast                                | Carcinoma       | 108  | 0.824 | 0.820 |
| HCC1937    | Breast Carcinoma                                            | Breast                                | Carcinoma       | 78   | 0.806 | 0.791 |
| HCC1954    | Breast Carcinoma                                            | Breast                                | Carcinoma       | 94   | 0.829 | 0.830 |

|              |                                              |                                    |                |       |       |       |
|--------------|----------------------------------------------|------------------------------------|----------------|-------|-------|-------|
| HCC2998      | Colon adenocarcinoma                         | Colon                              | Adenocarcinoma | 708   | 0.872 | 0.871 |
| HCC78        | Lung adenocarcinoma                          | Lung                               | Adenocarcinoma | 65    | 0.989 | 0.989 |
| HCC827       | Lung Adenocarcinoma                          | Lung                               | Adenocarcinoma | 113   | 0.985 | 0.985 |
| HCT-116      | Colon carcinoma                              | Colon                              | Carcinoma      | 10992 | 0.890 | 0.889 |
| HCT-116/VM46 | Colon carcinoma                              | Colon                              | Carcinoma      | 104   | 0.998 | 0.998 |
| HCT-15       | Colon adenocarcinoma                         | Colon                              | Adenocarcinoma | 2078  | 0.910 | 0.909 |
| HCT-8        | Ileocecal adenocarcinoma                     | Large intestine                    | Adenocarcinoma | 681   | 0.960 | 0.958 |
| HEC-1B       | Adenocarcinoma                               | Uterus Endometrium                 | Adenocarcinoma | 11    | 1.000 | 1.000 |
| HEK-293T     | Renal epithelial line                        | Kidney                             | Normal         | 58    | 0.967 | 0.967 |
| HEK293       | Embryonic kidney fibroblast                  | Kidney                             | Normal         | 1110  | 0.898 | 0.898 |
| HEL          | Erythroleukemia                              | Blood                              | Leukemia       | 302   | 0.903 | 0.900 |
| HEL299       | Fibroblasts                                  | Lung                               | Normal         | 4     | 0.899 | 0.904 |
| HET-1A       | Epithelial cell                              | Esophagus                          | Normal         | 4     | 0.998 | 0.998 |
| HEY          | Ovarian carcinoma                            | Ovary                              | Carcinoma      | 34    | 0.967 | 0.968 |
| HFF          | Foreskin fibroblast                          | Skin                               | Normal         | 27    | 0.955 | 0.951 |
| HFL1         | Human foetal lung fibroblast                 | Lung                               | Normal         | 309   | 0.996 | 0.996 |
| HGC-27       | Gastric carcinoma                            | Stomach                            | Carcinoma      | 148   | 0.830 | 0.821 |
| HK-2         | Papilloma                                    | Kidney                             | Normal         | 10    | 0.879 | 0.881 |
| HL-60        | Promyeloblast leukemia                       | Haematopoietic and lymphoid tissue | Leukemia       | 5486  | 0.881 | 0.880 |
| HL-60(TB)    | Adult acute myeloid leukemia                 | Blood                              | Leukemia       | 53    | 0.950 | 0.949 |
| HMEC-1       | Dermal microvascular endothelial cell        | Skin; Dermis; Endothelium          | Normal         | 42    | 0.981 | 0.981 |
| HN5          | Squamous cell carcinoma                      | Skin                               | Carcinoma      | 75    | 0.987 | 0.987 |
| HONE1        | Nasopharyngeal carcinoma                     | Head and neck                      | Carcinoma      | 5     | 1.000 | 1.000 |
| HOP-18       | Non-small cell lung carcinoma                | Lung                               | Carcinoma      | 9     | 0.933 | 0.862 |
| HOP-62       | Non-small cell lung carcinoma                | Lung                               | Carcinoma      | 1318  | 0.898 | 0.897 |
| HOP-92       | Non-small cell lung carcinoma                | Lung                               | Carcinoma      | 679   | 0.862 | 0.856 |
| HOS          | Osteosarcoma                                 | Bone                               | Sarcoma        | 161   | 0.863 | 0.852 |
| HOS-TE85     | Osteosarcoma                                 | Bone                               | Sarcoma        | 13    | 0.844 | 0.845 |
| HPAC         | Pancreatic adenocarcinoma                    | Pancreas                           | Adenocarcinoma | 28    | 0.932 | 0.934 |
| HRT-18       | Colon adenocarcinoma                         | Colon                              | Adenocarcinoma | 4     | 1.000 | 1.000 |
| HS27         | Fibroblast                                   | Skin                               | Normal         | 41    | 0.970 | 0.968 |
| HT           | Lymphoma                                     | Haematopoietic and lymphoid tissue | Leukemia       | 121   | 0.857 | 0.860 |
| HT-1080      | Fibrosarcoma                                 | Soft tissue                        | Sarcoma        | 534   | 0.918 | 0.916 |
| HT-29        | Colon adenocarcinoma                         | Colon                              | Adenocarcinoma | 7636  | 0.888 | 0.887 |
| HT1197       | Carcinoma                                    | Urinary bladder                    | Carcinoma      | 59    | 0.815 | 0.815 |
| HUVEC        | Umbilical vein endothelial cell              | Endothelium                        | Normal         | 131   | 0.897 | 0.892 |
| HaCaT        | Keratinocyte                                 | Skin                               | Normal         | 375   | 0.967 | 0.967 |
| HeLa         | Cervical adenocarcinoma                      | Cervix                             | Adenocarcinoma | 8431  | 0.885 | 0.884 |
| HeLa S3      | Adenocarcinoma                               | Uterus; Cervix                     | Adenocarcinoma | 23    | 0.974 | 0.975 |
| Hep 3B2      | Childhood hepatocellular carcinoma           | Liver                              | Carcinoma      | 135   | 0.957 | 0.956 |
| Hep293TT     | Hepatoblastoma                               | Liver                              | Hepatoblastoma | 13    | 0.987 | 0.987 |
| HepG2        | Hepatoblastoma                               | Liver                              | Hepatoblastoma | 7802  | 0.873 | 0.871 |
| HepG 22.2.15 | Hepatoblastoma                               | Liver                              | Hepatoblastoma | 12    | 0.853 | 0.854 |
| HepG2-CD81   | Hepatoblastoma (HepG2) cells expressing CD81 | Liver                              | Hepatoblastoma | 5768  | 0.932 | 0.932 |
| Hs-578T      | Invasive ductal breast carcinoma             | Breast                             | Carcinoma      | 434   | 0.869 | 0.865 |

|             |                                                             |                                    |                |      |       |       |
|-------------|-------------------------------------------------------------|------------------------------------|----------------|------|-------|-------|
| Hs683       | Glioma                                                      | Brain                              | Glioma         | 47   | 0.959 | 0.958 |
| Hs766       | Pancreatic adenocarcinoma                                   | Liver                              | Carcinoma      | 11   | 1.000 | 1.000 |
| HuCC-A1     | Intrahepatic cholangiocarcinoma                             | Liver                              | Carcinoma      | 16   | 0.881 | 0.883 |
| HuP-T3      | Pancreatic adenocarcinoma                                   | Pancreas                           | Adenocarcinoma | 62   | 0.868 | 0.867 |
| HuT78       | T-lymphoma                                                  | Haematopoietic and lymphoid tissue | Leukemia       | 40   | 0.978 | 0.977 |
| Huh-7       | Hepatocellular carcinoma                                    | Liver                              | Carcinoma      | 555  | 0.920 | 0.919 |
| IGROV-1     | Ovarian adenocarcinoma                                      | Ovary                              | Adenocarcinoma | 1116 | 0.891 | 0.888 |
| IMR-32      | Neuroblastoma                                               | Nervous system                     | Neuroblastoma  | 188  | 0.951 | 0.952 |
| IMR-90      | Embryonic lung fibroblast                                   | Lung                               | Normal         | 18   | 0.879 | 0.869 |
| Ishikawa    | Uterine carcinoma                                           | Uterus                             | Carcinoma      | 111  | 0.965 | 0.965 |
| JAM         | Ovarian cystadenocarcinoma                                  | Ovary                              | Adenocarcinoma | 5    | 0.999 | 0.999 |
| JJN-3       | Plasma cell myeloma                                         | Bone Marrow                        | Myeloma        | 17   | 1.000 | 1.000 |
| JY          | EBV-positive lymphoblastoid B cell line                     | Blood                              | Normal         | 13   | 1.000 | 1.000 |
| JeKo-1      | Lymphoma                                                    | Blood                              | Lymphoma       | 74   | 0.948 | 0.950 |
| Jurkat      | Acute leukemic T-cells                                      | Blood                              | Leukemia       | 218  | 0.946 | 0.947 |
| Jurkat E6.1 | Acute T cell leukemia                                       | Blood                              | Leukemia       | 5    | 1.000 | 1.000 |
| K-562R      | Blast phase chronic myelogenous leukemia, BCR-ABL1 positive | Haematopoietic and lymphoid tissue | Leukemia       | 14   | 0.869 | 0.870 |
| K562        | Erythroleukemia                                             | Haematopoietic and lymphoid tissue | Leukemia       | 6204 | 0.892 | 0.892 |
| K562/Adr    | Blast phase chronic myelogenous leukemia, BCR-ABL1 positive | Haematopoietic and lymphoid tissue | Leukemia       | 13   | 0.972 | 0.974 |
| KARPAS-299  | Anaplastic large cell lymphoma                              | Haematopoietic and lymphoid tissue | Leukemia       | 291  | 0.939 | 0.940 |
| KARPAS-422  | Diffuse large B-cell lymphoma germinal center B-cell type   | Haematopoietic and lymphoid tissue | Leukemia       | 128  | 0.875 | 0.875 |
| KB          | Human papillomavirus-related squamous cell carcinoma        | Uterus; cervix                     | Carcinoma      | 203  | 0.966 | 0.967 |
| KB 3-1      | Human papillomavirus-related endocervical adenocarcinoma    | Uterus                             | Adenocarcinoma | 22   | 0.960 | 0.962 |
| KB/VJ300    | Human papillomavirus-related endocervical adenocarcinoma    | Uterus                             | Adenocarcinoma | 23   | 0.989 | 0.989 |
| KBM5        | Chronic myelogenous leukemia, BCR-ABL1 positive             | Blood                              | Leukemia       | 6    | 0.931 | 0.932 |
| KETR3       | Renal carcinoma                                             | Kidney                             | Carcinoma      | 43   | 0.981 | 0.980 |
| KG-1        | Acute myelogenous leukemia                                  | Blood                              | Leukemia       | 253  | 0.901 | 0.897 |
| KG-1a       | Acute myelogenous leukemia                                  | Blood                              | Leukemia       | 17   | 0.999 | 0.999 |
| KK-47       | Bladder carcinoma                                           | Bladder                            | Carcinoma      | 3    | 0.887 | 0.889 |
| KKLS        | Gastric adenocarcinoma                                      | Stomach                            | Adenocarcinoma | 4    | 1.000 | 1.000 |
| KM-20L2     | Colon adenocarcinoma                                        | Colon                              | Adenocarcinoma | 4    | 1.000 | 1.000 |
| KM12        | Colon adenocarcinoma                                        | Colon                              | Adenocarcinoma | 1049 | 0.875 | 0.873 |
| KM3/BTZ     | Plasma cell myeloma                                         | Bone Marrow                        | Myeloma        | 6    | 0.994 | 0.994 |
| KMS-12-BM   | Plasma cell myeloma                                         | Bone Marrow                        | Myeloma        | 4    | 0.998 | 0.998 |
| KOPTK1      | Childhood T acute lymphoblastic leukemia                    | Blood                              | Leukemia       | 5    | 0.808 | 0.809 |
| KYSE-520    | Esophageal squamous cell carcinoma                          | Esophagus                          | Carcinoma      | 83   | 0.858 | 0.857 |
| Kasumi-1    | Acute myeloblastic leukemia                                 | Blood                              | Leukemia       | 116  | 0.816 | 0.806 |
| L02         | Human papillomavirus-related endocervical adenocarcinoma    | Uterus                             | Adenocarcinoma | 193  | 0.933 | 0.934 |
| L132        | Human papillomavirus-related endocervical adenocarcinoma    | Uterus                             | Adenocarcinoma | 4    | 1.000 | 1.000 |
| L2987       | Lung adenocarcinoma                                         | Lung                               | Adenocarcinoma | 11   | 0.978 | 0.978 |
| L3.6pl      | Pancreatic adenosquamous carcinoma                          | Pancreas                           | Carcinoma      | 3    | 0.976 | 0.977 |
| LAPC4       | Prostate carcinoma                                          | Prostate                           | Carcinoma      | 16   | 1.000 | 1.000 |
| LNCaP       | Prostate carcinoma                                          | Prostate                           | Carcinoma      | 1665 | 0.947 | 0.947 |

|            |                                         |                                    |                |       |       |       |
|------------|-----------------------------------------|------------------------------------|----------------|-------|-------|-------|
| LNCaP C4-2 | Prostate carcinoma                      | Prostate                           | Carcinoma      | 4     | 0.996 | 0.997 |
| LOXIMVI    | Amelanotic melanoma                     | Skin                               | Melanoma       | 1010  | 0.877 | 0.876 |
| LS174T     | Colon adenocarcinoma                    | Colon                              | Adenocarcinoma | 78    | 0.910 | 0.906 |
| LXFL529    | Lung non-small cell carcinoma           | Lung                               | Carcinoma      | 13    | 0.979 | 0.980 |
| LoVo       | Colon adenocarcinoma                    | Colon                              | Adenocarcinoma | 71    | 0.911 | 0.914 |
| Lu1        | Lung carcinoma                          | Lung                               | Carcinoma      | 20    | 0.995 | 0.995 |
| M14        | Melanoma                                | Skin                               | Melanoma       | 1203  | 0.894 | 0.893 |
| M19-MEL    | Melanoma                                | Skin                               | Melanoma       | 9     | 0.925 | 0.866 |
| M21        | Melanoma                                | Skin                               | Melanoma       | 280   | 0.985 | 0.985 |
| M4Beu      | Melanoma                                | Skin                               | Melanoma       | 6     | 1.000 | 1.000 |
| MAXF401    | Breast carcinoma                        | Breast                             | Carcinoma      | 6     | 0.983 | 0.983 |
| MCF-10A    | Human mammary epithelial cell line      | Breast                             | Normal         | 71    | 0.943 | 0.943 |
| MCF-12A    | Human mammary epithelial cell line      | Breast                             | Normal         | 7     | 0.994 | 0.995 |
| MCF7       | Breast carcinoma                        | Breast                             | Carcinoma      | 15718 | 0.836 | 0.836 |
| MCF7R      | Breast carcinoma                        | Breast                             | Carcinoma      | 72    | 0.996 | 0.996 |
| MDA-MB-231 | Breast adenocarcinoma                   | Breast                             | Adenocarcinoma | 7364  | 0.881 | 0.880 |
| MDA-MB-361 | Breast adenocarcinoma                   | Breast                             | Adenocarcinoma | 174   | 0.872 | 0.875 |
| MDA-MB-435 | Amelanotic melanoma                     | Breast                             | Melanoma       | 101   | 0.947 | 0.944 |
| MDA-MB-436 | Breast adenocarcinoma                   | Breast                             | Adenocarcinoma | 29    | 0.933 | 0.934 |
| MDA-MB-453 | Breast adenocarcinoma                   | Breast                             | Adenocarcinoma | 233   | 0.888 | 0.886 |
| MDA-MB-468 | Breast adenocarcinoma                   | Breast                             | Adenocarcinoma | 1571  | 0.898 | 0.896 |
| MEC1       | Chronic lymphocytic leukemia            | Blood                              | Leukemia       | 14    | 0.997 | 0.997 |
| MES-SA     | Uterine corpus sarcoma                  | Uterus                             | Sarcoma        | 83    | 0.815 | 0.815 |
| MES-SA/Dx5 | Uterine corpus sarcoma                  | Uterus                             | Sarcoma        | 46    | 0.940 | 0.940 |
| MEXF276L   | Xenograft melanoma                      | Skin                               | Melanoma       | 4     | 0.808 | 0.809 |
| MGC-803    | Gastric mucinous adenocarcinoma         | Stomach                            | Adenocarcinoma | 214   | 0.959 | 0.959 |
| MIA PaCa-2 | Pancreatic carcinoma                    | Pancreas                           | Carcinoma      | 854   | 0.919 | 0.918 |
| MKN-28     | Gastric tubular adenocarcinoma          | Stomach                            | Adenocarcinoma | 17    | 0.919 | 0.920 |
| MKN-45     | Gastric adenocarcinoma                  | Stomach                            | Adenocarcinoma | 812   | 0.941 | 0.941 |
| MKN-74     | Gastric tubular adenocarcinoma          | Stomach                            | Adenocarcinoma | 49    | 0.856 | 0.860 |
| MM1.S      | Immunoglobulin A Lambda Myeloma         | Blood                              | Myeloma        | 204   | 0.988 | 0.988 |
| MM96L      | Melanoma                                | Skin                               | Melanoma       | 64    | 1.000 | 1.000 |
| MOLM-13    | Adult acute myeloid leukemia            | Blood                              | Leukemia       | 186   | 0.967 | 0.967 |
| MOLM-14    | Adult acute myeloid leukemia            | Blood                              | Leukemia       | 8     | 0.888 | 0.889 |
| MOLT-3     | T-lymphoblastic leukemia                | Blood                              | Leukemia       | 90    | 0.976 | 0.956 |
| MOLT-4     | Acute T-lymphoblastic leukemia          | Blood                              | Leukemia       | 1490  | 0.885 | 0.885 |
| MONO-MAC-6 | Adult acute monocytic leukemia          | Blood                              | Leukemia       | 92    | 0.807 | 0.810 |
| MR49F      | Prostate carcinoma                      | Prostate                           | Carcinoma      | 3     | 1.000 | 1.000 |
| MRC5       | Embryonic lung fibroblast               | Lung                               | Normal         | 596   | 0.916 | 0.916 |
| MSTO-211H  | Biphasic Mesothelioma                   | Lung                               | Mesothelioma   | 121   | 0.878 | 0.880 |
| MT2        | Lymphocyte (HTLV-1 producing cell line) | Blood                              | Normal         | 101   | 0.963 | 0.963 |
| MT4        | Adult T acute lymphoblastic leukemia    | Blood                              | Leukemia       | 466   | 0.974 | 0.973 |
| MV4-11     | Myeloid leukemia                        | Haematopoietic and lymphoid tissue | Leukemia       | 1832  | 0.947 | 0.947 |
| MX1        | Breast carcinoma                        | Breast                             | Carcinoma      | 243   | 0.974 | 0.973 |
| Mahlavu    | Hepatocellular carcinoma                | Liver                              | Carcinoma      | 3     | 0.937 | 0.938 |

|             |                                          |                                    |                |      |       |       |
|-------------|------------------------------------------|------------------------------------|----------------|------|-------|-------|
| Malme-3M    | Melanoma                                 | Skin                               | Melanoma       | 712  | 0.880 | 0.877 |
| Maver1      | Mantle Cell Lymphoma                     | Blood                              | Lymphoma       | 31   | 0.930 | 0.931 |
| NALM-6      | Adult B acute lymphoblastic leukemia     | Haematopoietic and lymphoid tissue | Leukemia       | 192  | 0.849 | 0.850 |
| NAMALVA     | EBV-related Burkitt lymphoma             | Blood                              | Lymphoma       | 35   | 0.986 | 0.986 |
| NB-4        | Acute promyelocytic leukemia             | Haematopoietic and lymphoid tissue | Leukemia       | 174  | 0.950 | 0.950 |
| NCH82       | Glioblastoma                             | Brain                              | Glioblastoma   | 6    | 1.000 | 1.000 |
| NCI-H128    | Small cell lung cancer                   | Lung                               | Carcinoma      | 16   | 0.908 | 0.914 |
| NCI-H1299   | Non-small cell lung carcinoma            | Lung                               | Carcinoma      | 470  | 0.916 | 0.914 |
| NCI-H157    | Lung squamous cell carcinoma             | Lung                               | Carcinoma      | 11   | 0.914 | 0.915 |
| NCI-H1581   | Non Small Cell Lung Cancer               | Lung                               | Carcinoma      | 146  | 0.871 | 0.865 |
| NCI-H1650   | Bronchoalveolar carcinoma                | Lung                               | Adenocarcinoma | 139  | 0.839 | 0.837 |
| NCI-H1703   | Non Small Cell Lung Cancer               | Lung                               | Carcinoma      | 86   | 0.851 | 0.842 |
| NCI-H187    | Small cell lung carcinoma                | Lung                               | Carcinoma      | 88   | 0.846 | 0.845 |
| NCI-H1975   | Bronchoalveolar carcinoma                | Lung                               | Carcinoma      | 717  | 0.950 | 0.950 |
| NCI-H1993   | Non-small cell lung cancer               | Lung                               | Adenocarcinoma | 146  | 0.913 | 0.914 |
| NCI-H2171   | Small cell lung cancer                   | Lung                               | Carcinoma      | 299  | 0.953 | 0.953 |
| NCI-H2228   | Non-small cell lung cancer               | Lung                               | Adenocarcinoma | 237  | 0.920 | 0.919 |
| NCI-H226    | Non-small cell lung carcinoma            | Lung                               | Carcinoma      | 868  | 0.880 | 0.878 |
| NCI-H2286   | Small cell lung cancer                   | Lung                               | Adenocarcinoma | 9    | 0.968 | 0.959 |
| NCI-H23     | Non-small cell lung carcinoma            | Lung                               | Carcinoma      | 1192 | 0.883 | 0.882 |
| NCI-H292    | Mucoepidermoid Pulmonary Carcinoma       | Lung                               | Carcinoma      | 142  | 0.845 | 0.847 |
| NCI-H295R   | Adrenal cortex carcinoma                 | Adrenal cortex                     | Carcinoma      | 11   | 0.856 | 0.860 |
| NCI-H3122   | Bronchioalveolar Carcinoma               | Lung; Bronchiole                   | Carcinoma      | 57   | 0.982 | 0.982 |
| NCI-H322M   | Non-small cell lung carcinoma            | Lung                               | Carcinoma      | 634  | 0.881 | 0.881 |
| NCI-H358    | Bronchioalveolar Carcinoma               | Lung; Bronchiole                   | Carcinoma      | 109  | 0.805 | 0.782 |
| NCI-H417    | Small cell lung carcinoma                | Lung                               | Carcinoma      | 22   | 0.985 | 0.985 |
| NCI-H441    | Papillary adenocarcinoma                 | Lung                               | Adenocarcinoma | 69   | 0.813 | 0.802 |
| NCI-H460    | Non-small cell lung carcinoma            | Lung                               | Carcinoma      | 3810 | 0.906 | 0.904 |
| NCI-H508    | Colorectal Adenocarcinoma                | Large intestine; Cecum             | Adenocarcinoma | 10   | 0.991 | 0.991 |
| NCI-H520    | Squamous Cell Carcinoma                  | Lung                               | Carcinoma      | 112  | 0.837 | 0.840 |
| NCI-H522    | Non-small cell lung carcinoma            | Lung                               | Carcinoma      | 1035 | 0.877 | 0.877 |
| NCI-H647    | Adenosquamous lung carcinoma             | Lung                               | Carcinoma      | 10   | 0.889 | 0.890 |
| NCI-H661    | Lung carcinoma                           | Lung                               | Carcinoma      | 120  | 0.831 | 0.823 |
| NCI-H69     | Small cell lung carcinoma                | Lung                               | Carcinoma      | 205  | 0.902 | 0.904 |
| NCI-H727    | Carcinoid                                | Lung; Bronchus                     | Carcinoma      | 107  | 0.828 | 0.812 |
| NCI-H929    | Plasma cell myeloma                      | Bone Marrow                        | Myeloma        | 35   | 0.972 | 0.974 |
| NCI-N87     | Gastric carcinoma                        | Stomach                            | Carcinoma      | 320  | 0.923 | 0.922 |
| NCI/ADR-RES | High grade ovarian serous adenocarcinoma | Ovarium                            | Adenocarcinoma | 98   | 0.914 | 0.911 |
| NHDF        | Fibroblast                               | Skin                               | Normal         | 30   | 0.953 | 0.955 |
| NSCLC       | Non-small cell lung carcinoma            | Lung                               | Carcinoma      | 22   | 0.957 | 0.950 |
| NT2         | Embryonal carcinoma                      | Germ cell. fibroblast              | Carcinoma      | 58   | 0.993 | 0.993 |
| NUGC-3      | Gastric carcinoma                        | Stomach                            | Carcinoma      | 288  | 0.926 | 0.927 |
| OCI-AML-3   | Adult acute myeloid leukemia             | Blood                              | Leukemia       | 14   | 0.982 | 0.982 |
| OCI-AML2    | Adult acute myeloid leukemia             | Blood                              | Leukemia       | 114  | 0.803 | 0.798 |
| OCI-Ly1     | Diffuse large B-cell lymphoma            | Lymphoid tissue                    | Lymphoma       | 5    | 1.000 | 1.000 |

|           |                                                     |                                    |                |      |       |       |
|-----------|-----------------------------------------------------|------------------------------------|----------------|------|-------|-------|
| OCI-Ly10  | Diffuse large B-cell lymphoma activated B-cell type | Lymphoid tissue                    | Lymphoma       | 3    | 0.919 | 0.922 |
| OCI-Ly3   | Diffuse large B-cell lymphoma activated B-cell type | Lymphoid tissue                    | Lymphoma       | 40   | 0.986 | 0.986 |
| OE33      | Barrett adenocarcinoma                              | Esophagus                          | Adenocarcinoma | 56   | 0.805 | 0.802 |
| OPM-2     | Plasma cell myeloma                                 | Bone Marrow                        | Myeloma        | 81   | 0.823 | 0.829 |
| OS-RC-2   | Clear cell renal cell carcinoma                     | Kidney                             | Carcinoma      | 117  | 0.812 | 0.808 |
| OVCAR-3   | Ovarian adenocarcinoma                              | Ovary                              | Adenocarcinoma | 1728 | 0.907 | 0.907 |
| OVCAR-4   | Ovarian adenocarcinoma                              | Ovary                              | Adenocarcinoma | 715  | 0.859 | 0.854 |
| OVCAR-5   | Ovarian adenocarcinoma                              | Ovary                              | Adenocarcinoma | 617  | 0.866 | 0.863 |
| OVCAR-8   | Ovarian adenocarcinoma                              | Ovary                              | Adenocarcinoma | 973  | 0.885 | 0.883 |
| OVXF1023  | Ovarian adenocarcinoma                              | Ovary                              | Adenocarcinoma | 3    | 1.000 | 1.000 |
| OVXF1353  | Ovarian adenocarcinoma                              | Ovary                              | Adenocarcinoma | 3    | 1.000 | 1.000 |
| PA-1      | Ovarian carcinoma                                   | Ovary                              | Carcinoma      | 159  | 0.854 | 0.843 |
| PANC-1    | Pancreatic carcinoma                                | Pancreas                           | Carcinoma      | 728  | 0.933 | 0.933 |
| PBMC      | Peripheral blood mononuclear cell                   | Blood                              | Normal         | 69   | 0.932 | 0.934 |
| PC-12     | Rat adrenal gland pheochromocytoma                  | Adrenal gland                      | Carcinoma      | 21   | 0.943 | 0.943 |
| PC-14     | Lung adenocarcinoma                                 | Lung                               | Carcinoma      | 252  | 0.932 | 0.928 |
| PC-3      | Prostate carcinoma                                  | Prostate                           | Carcinoma      | 5760 | 0.883 | 0.882 |
| PC-3M     | Prostate carcinoma                                  | Prostate                           | Carcinoma      | 7    | 0.870 | 0.871 |
| PC-9      | Lung adenocarcinoma                                 | Lung                               | Adenocarcinoma | 130  | 0.951 | 0.952 |
| PLC-PRF-5 | Adult hepatocellular carcinoma                      | Liver                              | Carcinoma      | 50   | 0.827 | 0.830 |
| PNT1A     | Human prostate epithelium cell line                 | Prostate                           | Normal         | 8    | 0.881 | 0.881 |
| PT-45     | Pancreatic carcinoma                                | Pancreas                           | Carcinoma      | 20   | 0.938 | 0.939 |
| Panc203   | Pancreatic carcinoma                                | Pancreas                           | Carcinoma      | 6    | 1.000 | 1.000 |
| Panc430   | Pancreatic carcinoma                                | Pancreas                           | Carcinoma      | 8    | 1.000 | 1.000 |
| Pfeiffer  | Diffuse Large Cell Lymphoma                         | Blood                              | Lymphoma       | 35   | 0.993 | 0.993 |
| QG-56     | Squamous cell lung carcinoma                        | Lung                               | Carcinoma      | 90   | 1.000 | 1.000 |
| QGY-7703  | Hepatocellular carcinoma                            | Liver                              | Carcinoma      | 48   | 0.976 | 0.976 |
| RCC4      | Clear cell renal cell carcinoma                     | Kidney                             | Carcinoma      | 3    | 0.845 | 0.848 |
| RD        | Rhabdomyosarcoma                                    | Muscle                             | Normal         | 104  | 0.828 | 0.832 |
| RKO       | Colon carcinoma                                     | Colon                              | Carcinoma      | 343  | 0.879 | 0.877 |
| RL        | Non-Hodgkin's Lymphoma                              | Ascites                            | Lymphoma       | 43   | 0.833 | 0.836 |
| RPMI-7951 | Malignant Melanoma                                  | Skin                               | Melanoma       | 130  | 0.854 | 0.847 |
| RPMI-8226 | Multiple myeloma                                    | Haematopoietic and lymphoid tissue | Myeloma        | 1013 | 0.883 | 0.881 |
| RS4-11    | Adult B acute lymphoblastic leukemia                | Bone Marrow                        | Leukemia       | 198  | 0.835 | 0.831 |
| RWLeu4    | Chronic myelogenous leukemia                        | Blood                              | Leukemia       | 9    | 1.000 | 1.000 |
| RWPE-1    | Prostatic epithelial cell line                      | Prostate                           | Normal         | 28   | 0.922 | 0.924 |
| RXF393    | Renal cell carcinoma                                | Kidney                             | Carcinoma      | 795  | 0.873 | 0.869 |
| RXF944    | Renal cell carcinoma                                | Kidney                             | Carcinoma      | 8    | 0.989 | 0.989 |
| Raji      | B-lymphoblastic cells                               | Haematopoietic and lymphoid tissue | Leukemia       | 430  | 0.938 | 0.938 |
| Ramos     | Burkitts lymphoma B-cells                           | Blood                              | Leukemia       | 189  | 0.958 | 0.959 |
| Rec1      | Lymphoma; Mantle Cell                               | Lymph node                         | Lymphoma       | 22   | 1.000 | 1.000 |
| S1B1-20   | Colon carcinoma                                     | Colon                              | Carcinoma      | 38   | 1.000 | 1.000 |
| SEM       | Childhood B acute lymphoblastic leukemia            | Blood                              | Leukemia       | 21   | 0.999 | 0.999 |
| SF-268    | Glioblastoma                                        | Brain                              | Glioblastoma   | 1287 | 0.890 | 0.889 |
| SF-295    | Glioblastoma                                        | Brain                              | Glioblastoma   | 1016 | 0.884 | 0.882 |



|            |                                                           |                                    |                |      |       |       |
|------------|-----------------------------------------------------------|------------------------------------|----------------|------|-------|-------|
| SF-539     | Glioblastoma                                              | Brain                              | Glioblastoma   | 1104 | 0.888 | 0.888 |
| SGC-7901   | Gastric carcinoma                                         | Stomach                            | Carcinoma      | 128  | 0.963 | 0.963 |
| SH-SY5Y    | Bone marrow neuroblastoma                                 | Brain                              | Neuroblastoma  | 380  | 0.930 | 0.926 |
| SISO       | Uterine cervical adenocarcinoma                           | Cervix                             | Adenocarcinoma | 28   | 0.950 | 0.950 |
| SJSA-1     | Osteosarcoma                                              | Bone                               | Sarcoma        | 398  | 0.940 | 0.940 |
| SK-BR-3    | Breast adenocarcinoma                                     | Breast                             | Adenocarcinoma | 1479 | 0.950 | 0.949 |
| SK-HEP1    | Hepatocellular carcinoma                                  | Liver                              | Carcinoma      | 234  | 0.912 | 0.911 |
| SK-LU-1    | Adenocarcinoma                                            | Lung                               | Carcinoma      | 80   | 0.810 | 0.806 |
| SK-MEL-1   | Metastatic melanoma                                       | Skin                               | Melanoma       | 64   | 0.808 | 0.808 |
| SK-MEL-103 | Melanoma                                                  | Skin                               | Melanoma       | 3    | 0.999 | 0.999 |
| SK-MEL-2   | Melanoma                                                  | Skin                               | Melanoma       | 1048 | 0.885 | 0.885 |
| SK-MEL-28  | Melanoma                                                  | Skin                               | Melanoma       | 1160 | 0.879 | 0.879 |
| SK-MEL-5   | Melanoma                                                  | Skin                               | Melanoma       | 1037 | 0.903 | 0.902 |
| SK-MES-1   | Squamous cell lung carcinoma                              | Lung                               | Carcinoma      | 127  | 0.834 | 0.831 |
| SK-N-SH    | Neuroblastoma                                             | Nervous system                     | Neuroblastoma  | 213  | 0.950 | 0.950 |
| SK-OV-3    | Ovarian carcinoma                                         | Ovarium                            | Carcinoma      | 2424 | 0.896 | 0.894 |
| SKM-1      | Adult acute myeloid leukemia                              | Blood                              | Leukemia       | 66   | 0.917 | 0.918 |
| SKW6.4     | Blastoid B-Cell                                           | Lymphocytes                        | Normal         | 40   | 1.000 | 1.000 |
| SMMC-7721  | Hepatocellular carcinoma                                  | Liver                              | Carcinoma      | 298  | 0.959 | 0.956 |
| SN12C      | Renal carcinoma                                           | Kidney                             | Carcinoma      | 1176 | 0.896 | 0.895 |
| SNB-19     | Astrocytoma                                               | Brain                              | Astrocytoma    | 76   | 0.948 | 0.949 |
| SNB-7      | Glioblastoma                                              | Brain                              | Glioblastoma   | 4    | 0.999 | 0.999 |
| SNB-75     | Glioblastoma                                              | Nervous system                     | Glioblastoma   | 871  | 0.877 | 0.874 |
| SNU-16     | Gastric Carcinoma                                         | Stomach                            | Carcinoma      | 65   | 0.850 | 0.847 |
| SNU-398    | Hepatocellular carcinoma                                  | Liver                              | Carcinoma      | 74   | 0.970 | 0.970 |
| SNU-475    | Hepatocellular carcinoma                                  | Liver                              | Carcinoma      | 22   | 0.819 | 0.814 |
| SNU-5      | Gastric Carcinoma                                         | Stomach                            | Carcinoma      | 97   | 0.828 | 0.831 |
| SNU-638    | Gastric carcinoma                                         | Stomach                            | Carcinoma      | 170  | 0.969 | 0.959 |
| SPC-A4     | Lung Adenocarcinoma                                       | Lung                               | Adenocarcinoma | 10   | 1.000 | 1.000 |
| SQ20B      | Head and neck Squamous carcinoma                          | Head and neck                      | Carcinoma      | 33   | 0.958 | 0.960 |
| SR         | Adult immunoblastic lymphoma                              | Haematopoietic and lymphoid tissue | Lymphoma       | 944  | 0.877 | 0.875 |
| SU-DHL-6   | Large Cell Lymphoma                                       | Peritoneal effusion                | Lymphoma       | 71   | 0.986 | 0.986 |
| SU-DHL-8   | Large Cell Lymphoma                                       | Lymph node                         | Lymphoma       | 4    | 0.847 | 0.850 |
| SUD4       | Diffuse large B-cell lymphoma germinal center B-cell type | Lymphocytes                        | Lymphoma       | 14   | 0.811 | 0.814 |
| SUM-159-PT | Breast pleomorphic carcinoma                              | Breast                             | Carcinoma      | 31   | 0.982 | 0.981 |
| SUM149PT   | Breast inflammatory carcinoma                             | Breast                             | Carcinoma      | 3    | 0.983 | 0.984 |
| SUM185PE   | Breast ductal carcinoma                                   | Breast                             | Carcinoma      | 11   | 0.957 | 0.957 |
| SUNE1      | Nasopharyngeal carcinoma                                  | Nasopharynx                        | Carcinoma      | 3    | 1.000 | 1.000 |
| SW-1736    | Thyroid gland undifferentiated (anaplastic) carcinoma     | Thyroid                            | Carcinoma      | 80   | 0.987 | 0.987 |
| SW-620     | Colon adenocarcinoma                                      | Colon                              | Adenocarcinoma | 1845 | 0.887 | 0.887 |
| SW1116     | Colorectal Adenocarcinoma                                 | Colon                              | Adenocarcinoma | 46   | 0.864 | 0.867 |
| SW1353     | Bone chondrosarcoma                                       | Bone                               | Sarcoma        | 41   | 0.938 | 0.938 |
| SW1573     | Lung carcinoma                                            | Lung                               | Carcinoma      | 228  | 0.919 | 0.917 |
| SW1990     | Pancreatic adenocarcinoma                                 | Pancreas                           | Adenocarcinoma | 108  | 0.876 | 0.875 |
| SW48       | Colorectal Adenocarcinoma                                 | Colon                              | Adenocarcinoma | 101  | 0.806 | 0.809 |
| SW480      | Colon adenocarcinoma                                      | Colon                              | Adenocarcinoma | 846  | 0.932 | 0.932 |

|           |                                                     |                                    |             |      |       |       |
|-----------|-----------------------------------------------------|------------------------------------|-------------|------|-------|-------|
| SiHa      | Cervical squamous cell carcinoma                    | Cervix                             | Carcinoma   | 28   | 0.859 | 0.851 |
| Sku1B     | Rb positive uterine leiomyosarcoma                  | Uterus                             | Sarcoma     | 6    | 1.000 | 1.000 |
| T-24      | Bladder carcinoma                                   | Urinary tract                      | Carcinoma   | 297  | 0.925 | 0.923 |
| T47D      | Breast carcinoma                                    | Breast                             | Carcinoma   | 461  | 0.936 | 0.934 |
| T98       | Glioblastoma                                        | Brain                              | Blastoma    | 5    | 1.000 | 1.000 |
| T98G      | Glioblastoma                                        | Brain                              | Carcinoma   | 21   | 0.912 | 0.912 |
| TERT-RPE1 | Retinal pigmented epithelial cell                   | Retina                             | Normal      | 31   | 0.942 | 0.942 |
| TF-1      | Bone marrow erythroleukemic                         | Haematopoietic and lymphoid tissue | Leukemia    | 34   | 0.972 | 0.972 |
| THP-1     | Acute monocytic leukemia                            | Blood                              | Leukemia    | 1482 | 0.937 | 0.934 |
| TK-10     | Renal carcinoma                                     | Kidney                             | Carcinoma   | 731  | 0.854 | 0.851 |
| TMD8      | Diffuse large B-cell lymphoma activated B-cell type | Lymphocytes                        | Lymphoma    | 7    | 0.811 | 0.816 |
| TOV112D   | Ovarian endometrioid adenocarcinoma                 | Ovary                              | Carcinoma   | 4    | 0.998 | 0.998 |
| TSGH9201  | Gastric signet ring cell adenocarcinoma             | Stomach                            | Carcinoma   | 18   | 1.000 | 1.000 |
| TSU       | Prostatic carcinoma                                 | Prostate                           | Carcinoma   | 15   | 0.947 | 0.948 |
| U-251     | Astrocytoma                                         | Brain                              | Astrocytoma | 1478 | 0.883 | 0.882 |
| U-266     | Plasma cell myeloma                                 | Blood                              | Myeloma     | 147  | 0.870 | 0.864 |
| U-87MG    | Glioblastoma                                        | Brain                              | Blastoma    | 622  | 0.921 | 0.919 |
| U-937     | Histiocytic lymphoma                                | Haematopoietic and lymphoid tissue | Lymphoma    | 138  | 0.926 | 0.920 |
| U-937/GTB | Histiocytic lymphoma                                | Blood                              | Lymphoma    | 10   | 0.846 | 0.852 |
| U2OS      | Osteosarcoma                                        | Bone                               | Sarcoma     | 299  | 0.885 | 0.883 |
| UACC-257  | Melanoma                                            | Skin                               | Melanoma    | 571  | 0.861 | 0.858 |
| UACC-375  | Melanoma                                            | Skin                               | Melanoma    | 86   | 0.994 | 0.994 |
| UACC-62   | Melanoma                                            | Skin                               | Melanoma    | 1217 | 0.904 | 0.902 |
| UACC-903  | Malignant melanoma                                  | Skin                               | Melanoma    | 38   | 0.954 | 0.953 |
| UCLAP-3   | Lung squamous cell carcinoma                        | Lung                               | Carcinoma   | 5    | 1.000 | 1.000 |
| UMSCC22B  | Hypopharyngeal squamous cell carcinoma              | Upper aerodigestive tract          | Carcinoma   | 4    | 1.000 | 1.000 |
| UMUC3     | Bladder Carcinoma                                   | Urinary tract                      | Carcinoma   | 86   | 0.810 | 0.806 |
| UO-31     | Renal carcinoma                                     | Kidney                             | Carcinoma   | 745  | 0.879 | 0.879 |
| VCaP      | Prostate carcinoma                                  | Prostate                           | Carcinoma   | 86   | 0.980 | 0.980 |
| WI-38     | Embryonic lung fibroblast                           | Lung                               | Normal      | 288  | 0.943 | 0.941 |
| WIL2      | Lymphoblastoid cell                                 | Haematopoietic, lymphoid tissue    | Normal      | 39   | 1.000 | 1.000 |
| WIL2-NS   | Lymphoblastoid cell                                 | Haematopoietic, lymphoid tissue    | Normal      | 49   | 0.979 | 0.979 |
| WM 266-4  | Melanoma                                            | skin                               | Melanoma    | 17   | 0.977 | 0.977 |
| WM164     | Cutaneous melanoma                                  | skin                               | Melanoma    | 18   | 0.964 | 0.964 |
| WiDr      | Adenocarcinoma; Colorectal                          | Colon                              | Carcinoma   | 23   | 0.893 | 0.896 |
| XF498     | Glioma                                              | Brain                              | Glioma      | 98   | 0.965 | 0.964 |
| Y79       | Retinoblastoma                                      | Eye; Retina                        | Blastoma    | 14   | 0.963 | 0.964 |
| YAPC      | Pancreatic carcinoma                                | Pancreas                           | Carcinoma   | 50   | 0.817 | 0.810 |
| Z-138     | Lymphoma; Mantle Cell                               | lymph nodes                        | Lymphoma    | 51   | 0.925 | 0.922 |
| ZR-75-1   | Breast carcinoma                                    | Breast                             | Carcinoma   | 242  | 0.965 | 0.966 |

**Number** – number of active compounds; **LOO CV** – leave-one-out cross-validation; **20-Fold CV** – 20-fold cross-validation.
