# Supplementary material for: CLC-Pred 2.0: A Freely Available Web Application for In Silico Prediction of Human Cell Line Cytotoxicity and Molecular Mechanisms of Action for Druglike Compounds
Source: MDPI journal article supplement (doi:10.3390/ijms24021689), 2023-01-14
Supplement: s1 [file s1]

**Table S3:** The information related with description of the training set based on ChEMBL and PubChem data and accuracy of prediction for 2170 molecular mechanisms of action.

| Activity Type                                                                            | UniProt ID | Number | IAP, LOO | IAP, 20-Fold | ChEMBL protein family level 1 | ChEMBL protein family level 2       |
|------------------------------------------------------------------------------------------|------------|--------|----------|--------------|-------------------------------|-------------------------------------|
| [Pyruvate dehydrogenase (acetyl-transferring)] kinase isozyme 1, mitochondrial inhibitor | Q15118     | 598    | 0.9787   | 0.979        | Enzyme                        | Kinase                              |
| [Pyruvate dehydrogenase (acetyl-transferring)] kinase isozyme 2, mitochondrial inhibitor | Q15119     | 769    | 0.9967   | 0.997        | Enzyme                        | Kinase                              |
| [Pyruvate dehydrogenase (acetyl-transferring)] kinase isozyme 3, mitochondrial inhibitor | Q15120     | 28     | 0.9168   | 0.915        | Enzyme                        | Kinase                              |
| [Pyruvate dehydrogenase (acetyl-transferring)] kinase isozyme 4, mitochondrial inhibitor | Q16654     | 39     | 0.9712   | 0.972        | Enzyme                        | Kinase                              |
| 1,25-dihydroxyvitamin D(3) 24-hydroxylase, mitochondrial inhibitor                       | Q07973     | 63     | 0.9993   | 0.999        | Enzyme                        | Cytochrome P450                     |
| 10 kDa heat shock protein, mitochondrial inhibitor                                       | P61604     | 49     | 0.9583   | 0.958        | Unclassified protein          | NA                                  |
| 11-beta-hydroxysteroid dehydrogenase 1 inhibitor                                         | P28845     | 2295   | 0.9926   | 0.993        | Enzyme                        | Oxidoreductase                      |
| 11-beta-hydroxysteroid dehydrogenase type 2 inhibitor                                    | P80365     | 102    | 0.9934   | 0.993        | Enzyme                        | NA                                  |
| 14-3-3 protein sigma inhibitor                                                           | P31947     | 6      | 0.9987   | 0.999        | Unclassified protein          | NA                                  |
| 15-hydroxyprostaglandin dehydrogenase [NAD(+)] inhibitor                                 | P15428     | 3044   | 0.901    | 0.901        | Enzyme                        | NA                                  |
| 17-beta-hydroxysteroid dehydrogenase 14 inhibitor                                        | Q9BPX1     | 47     | 1.000    | 1.000        | Enzyme                        | Oxidoreductase                      |
| 17-beta-hydroxysteroid dehydrogenase type 1 inhibitor                                    | P14061     | 373    | 0.9938   | 0.994        | Enzyme                        | Oxidoreductase                      |
| 17-beta-hydroxysteroid dehydrogenase type 2 inhibitor                                    | P37059     | 470    | 0.9957   | 0.995        | Enzyme                        | Oxidoreductase                      |
| 17-beta-hydroxysteroid dehydrogenase type 3 inhibitor                                    | P37058     | 176    | 0.998    | 0.998        | Enzyme                        | Oxidoreductase                      |
| 1-acyl-sn-glycerol-3-phosphate acyltransferase beta inhibitor                            | O15120     | 102    | 1.000    | 1.000        | Enzyme                        | Transferase                         |
| 1-phosphatidylinositol 4,5-bisphosphate phosphodiesterase gamma-2 inhibitor              | P16885     | 12     | 0.9134   | 0.916        | Enzyme                        | Hydrolase                           |
| 2-5A-dependent ribonuclease activator                                                    | Q05823     | 3      | 1.000    | 1.000        | Enzyme                        | Hydrolase                           |
| 2-5A-dependent ribonuclease inhibitor                                                    | Q05823     | 8      | 1.000    | 1.000        | Enzyme                        | Hydrolase                           |
| 25-hydroxyvitamin D-1 alpha hydroxylase, mitochondrial inhibitor                         | O15528     | 10     | 0.9967   | 0.997        | Enzyme                        | Cytochrome P450                     |
| 26S proteasome non-ATPase regulatory subunit 14 inhibitor                                | O00487     | 91     | 0.9246   | 0.925        | Enzyme                        | Protease                            |
| 2-acylglycerol O-acyltransferase 2 inhibitor                                             | Q3SYC2     | 176    | 0.9999   | 1.000        | Enzyme                        | Transferase                         |
| 2-amino-3-carboxymuconate-6-semialdehyde decarboxylase inhibitor                         | Q8TDX5     | 37     | 1.000    | 1.000        | Enzyme                        | Lyase                               |
| 2'-deoxynucleoside 5'-phosphate N-hydrolase 1 inhibitor                                  | O43598     | 20     | 1.000    | 1.000        | Enzyme                        | Hydrolase                           |
| 2-Hydroxyacid oxidase 1 inhibitor                                                        | Q9UJM8     | 15     | 0.9984   | 0.998        | Enzyme                        | Oxidoreductase                      |
| 2-oxoglutarate receptor 1 antagonist                                                     | Q96P68     | 3      | 1.000    | 1.000        | Membrane receptor             | Family A G protein-coupled receptor |
| 3 beta-hydroxysteroid dehydrogenase/Delta 5-->4-isomerase type 1 inhibitor               | P14060     | 14     | 1.000    | 1.000        | Enzyme                        | NA                                  |
| 3-beta-hydroxysteroid-Delta(8),Delta(7)-isomerase inhibitor                              | Q15125     | 7      | 0.992    | 0.992        | Enzyme                        | Isomerase                           |
| 3-hydroxy-3-methylglutaryl-coenzyme A reductase inhibitor                                | P04035     | 191    | 0.9979   | 0.998        | Enzyme                        | Oxidoreductase                      |
| 3-hydroxyacyl-CoA dehydrogenase type-2 inhibitor                                         | Q99714     | 2234   | 0.878    | 0.877        | Enzyme                        | Oxidoreductase                      |

|                                                                                |        |      |        |       |                      |                                     |
|--------------------------------------------------------------------------------|--------|------|--------|-------|----------------------|-------------------------------------|
| 3-keto-steroid reductase inhibitor                                             | P56937 | 3    | 1.000  | 1.000 | Enzyme               | Oxidoreductase                      |
| 3-keto-steroid reductase/17-beta-hydroxysteroid dehydrogenase 7 inhibitor      | P56937 | 4    | 1.000  | 1.000 | Enzyme               | Oxidoreductase                      |
| 3-oxo-5-alpha-steroid 4-dehydrogenase 1 inhibitor                              | P18405 | 365  | 0.9965 | 0.996 | Enzyme               | Oxidoreductase                      |
| 3-oxo-5-alpha-steroid 4-dehydrogenase 2 inhibitor                              | P31213 | 371  | 0.9973 | 0.997 | Enzyme               | Oxidoreductase                      |
| 3-phosphoinositide-dependent protein kinase 1 inhibitor                        | O15530 | 615  | 0.9905 | 0.989 | Enzyme               | Kinase                              |
| 40S ribosomal protein S27 inhibitor                                            | P42677 | 7    | 1.000  | 1.000 | Unclassified protein | NA                                  |
| 4-galactosyl-N-acetylglucosaminide 3-alpha-L-fucosyltransferase FUT6 inhibitor | P51993 | 5    | 1.000  | 1.000 | Enzyme               | Transferase                         |
| 4-hydroxyphenylpyruvate dioxygenase inhibitor                                  | P32754 | 220  | 0.9999 | 1.000 | Enzyme               | Oxidoreductase                      |
| 5'-AMP-activated protein kinase catalytic subunit alpha-1 inhibitor            | Q13131 | 36   | 0.9293 | 0.931 | Enzyme               | Kinase                              |
| 5'-AMP-activated protein kinase subunit beta-1 inhibitor                       | Q9Y478 | 16   | 0.9013 | 0.89  | Enzyme               | Kinase                              |
| 5-hydroxytryptamine receptor 1A agonist                                        | P08908 | 334  | 0.9927 | 0.992 | Membrane receptor    | Family A G protein-coupled receptor |
| 5-hydroxytryptamine receptor 1A antagonist                                     | P08908 | 1717 | 0.9837 | 0.984 | Membrane receptor    | Family A G protein-coupled receptor |
| 5-hydroxytryptamine receptor 1B agonist                                        | P28222 | 56   | 0.9824 | 0.983 | Membrane receptor    | Family A G protein-coupled receptor |
| 5-hydroxytryptamine receptor 1B antagonist                                     | P28222 | 698  | 0.9868 | 0.987 | Membrane receptor    | Family A G protein-coupled receptor |
| 5-hydroxytryptamine receptor 1D agonist                                        | P28221 | 88   | 0.9992 | 0.999 | Membrane receptor    | Family A G protein-coupled receptor |
| 5-hydroxytryptamine receptor 1D antagonist                                     | P28221 | 830  | 0.9877 | 0.988 | Membrane receptor    | Family A G protein-coupled receptor |
| 5-hydroxytryptamine receptor 1E antagonist                                     | P28566 | 53   | 0.9261 | 0.928 | Membrane receptor    | Family A G protein-coupled receptor |
| 5-hydroxytryptamine receptor 1F agonist                                        | P30939 | 3    | 1.000  | 1.000 | Membrane receptor    | Family A G protein-coupled receptor |
| 5-hydroxytryptamine receptor 1F antagonist                                     | P30939 | 122  | 0.9919 | 0.992 | Membrane receptor    | Family A G protein-coupled receptor |
| 5-hydroxytryptamine receptor 2A agonist                                        | P28223 | 304  | 0.99   | 0.99  | Membrane receptor    | Family A G protein-coupled receptor |
| 5-hydroxytryptamine receptor 2A antagonist                                     | P28223 | 2073 | 0.9841 | 0.984 | Membrane receptor    | Family A G protein-coupled receptor |
| 5-hydroxytryptamine receptor 2B agonist                                        | P41595 | 293  | 0.9946 | 0.995 | Membrane receptor    | Family A G protein-coupled receptor |
| 5-hydroxytryptamine receptor 2B antagonist                                     | P41595 | 766  | 0.9557 | 0.956 | Membrane receptor    | Family A G protein-coupled receptor |
| 5-hydroxytryptamine receptor 2C agonist                                        | P28335 | 596  | 0.9957 | 0.995 | Membrane receptor    | Family A G protein-coupled receptor |
| 5-hydroxytryptamine receptor 2C antagonist                                     | P28335 | 1241 | 0.982  | 0.982 | Membrane receptor    | Family A G protein-coupled receptor |

|                                                                            |        |      |        |       |                   |                                     |
|----------------------------------------------------------------------------|--------|------|--------|-------|-------------------|-------------------------------------|
| 5-hydroxytryptamine receptor 3A agonist                                    | P46098 | 24   | 0.9793 | 0.98  | Ion channel       | Ligand-gated ion channel            |
| 5-hydroxytryptamine receptor 3A antagonist                                 | P46098 | 489  | 0.9862 | 0.986 | Ion channel       | Ligand-gated ion channel            |
| 5-hydroxytryptamine receptor 3D antagonist                                 | Q70Z44 | 186  | 0.9848 | 0.985 | Ion channel       | Ligand-gated ion channel            |
| 5-hydroxytryptamine receptor 4 agonist                                     | Q13639 | 243  | 0.9975 | 0.996 | Membrane receptor | Family A G protein-coupled receptor |
| 5-hydroxytryptamine receptor 4 antagonist                                  | Q13639 | 189  | 0.9832 | 0.984 | Membrane receptor | Family A G protein-coupled receptor |
| 5-hydroxytryptamine receptor 5A antagonist                                 | P47898 | 188  | 0.9781 | 0.978 | Membrane receptor | Family A G protein-coupled receptor |
| 5-hydroxytryptamine receptor 6 agonist                                     | P50406 | 123  | 0.9996 | 1.000 | Membrane receptor | Family A G protein-coupled receptor |
| 5-hydroxytryptamine receptor 6 antagonist                                  | P50406 | 1741 | 0.9914 | 0.992 | Membrane receptor | Family A G protein-coupled receptor |
| 5-hydroxytryptamine receptor 7 agonist                                     | P34969 | 14   | 0.9833 | 0.984 | Membrane receptor | Family A G protein-coupled receptor |
| 5-hydroxytryptamine receptor 7 antagonist                                  | P34969 | 645  | 0.9799 | 0.98  | Membrane receptor | Family A G protein-coupled receptor |
| 5'-nucleotidase inhibitor                                                  | P21589 | 90   | 0.9997 | 1.000 | Enzyme            | Phosphatase                         |
| 6-phosphofructo-2-kinase/fructose-2,6-bisphosphatase 1 inhibitor           | P16118 | 17   | 1.000  | 1.000 | Enzyme            | NA                                  |
| 6-phosphofructo-2-kinase/fructose-2,6-bisphosphatase 2 inhibitor           | O60825 | 20   | 1.000  | 1.000 | Enzyme            | NA                                  |
| 6-phosphofructo-2-kinase/fructose-2,6-bisphosphatase 3 inhibitor           | Q16875 | 281  | 0.9992 | 0.999 | Enzyme            | NA                                  |
| 6-phosphofructo-2-kinase/fructose-2,6-bisphosphatase 4 inhibitor           | Q16877 | 32   | 1.000  | 1.000 | Enzyme            | NA                                  |
| 6-phosphogluconate dehydrogenase, decarboxylating inhibitor                | P52209 | 11   | 1.000  | 1.000 | Enzyme            | Oxidoreductase                      |
| 72 kDa type IV collagenase inhibitor                                       | P08253 | 2855 | 0.9835 | 0.983 | Enzyme            | Protease                            |
| 7-alpha-hydroxycholest-4-en-3-one 12-alpha-hydroxylase inhibitor           | Q9UNU6 | 88   | 0.9916 | 0.992 | Enzyme            | Oxidoreductase                      |
| 7-dehydrocholesterol reductase inhibitor                                   | Q9UBM7 | 17   | 0.9977 | 0.998 | Enzyme            | Oxidoreductase                      |
| A disintegrin and metalloproteinase with thrombospondin motifs 1 inhibitor | Q9UHI8 | 4    | 0.9971 | 0.997 | Enzyme            | Protease                            |
| A disintegrin and metalloproteinase with thrombospondin motifs 4 inhibitor | O75173 | 239  | 0.9864 | 0.987 | Enzyme            | Protease                            |
| A disintegrin and metalloproteinase with thrombospondin motifs 5 inhibitor | Q9UNA0 | 397  | 0.9963 | 0.996 | Enzyme            | Protease                            |
| Acetylcholine receptor subunit alpha antagonist                            | P02708 | 10   | 0.9157 | 0.774 | Ion channel       | Ligand-gated ion channel            |
| Acetylcholine receptor subunit beta antagonist                             | P11230 | 4    | 1.000  | 1.000 | Ion channel       | Ligand-gated ion channel            |
| Acetylcholine receptor subunit epsilon antagonist                          | Q04844 | 14   | 0.9278 | 0.928 | Ion channel       | Ligand-gated ion channel            |
| Acetylcholine receptor subunit gamma antagonist                            | P07510 | 66   | 0.9975 | 0.998 | Ion channel       | Ligand-gated ion                    |

|                                                     |        |      |        |       |                         |                                     |
|-----------------------------------------------------|--------|------|--------|-------|-------------------------|-------------------------------------|
|                                                     |        |      |        |       |                         | channel                             |
| Acetylcholinesterase activator                      | P22303 | 8    | 0.9997 | 1.000 | Enzyme                  | Hydrolase                           |
| Acetylcholinesterase inhibitor                      | P22303 | 3083 | 0.9828 | 0.983 | Enzyme                  | Hydrolase                           |
| Acetyl-CoA carboxylase 1 inhibitor                  | Q13085 | 379  | 0.9961 | 0.996 | Enzyme                  | NA                                  |
| Acetyl-CoA carboxylase 2 inhibitor                  | O00763 | 882  | 0.9983 | 0.998 | Enzyme                  | Ligase                              |
| Acetyl-coenzyme A synthetase, cytoplasmic inhibitor | Q9NR19 | 319  | 1.000  | 1.000 | Enzyme                  | Ligase                              |
| Acetyl-coenzyme A transporter 1 inhibitor           | O00400 | 130  | 1.000  | 1.000 | Transporter             | Electrochemical transporter         |
| Acid ceramidase inhibitor                           | Q13510 | 119  | 1.000  | 1.000 | Enzyme                  | Hydrolase                           |
| Acidic mammalian chitinase inhibitor                | Q9BZP6 | 110  | 0.9865 | 0.977 | Enzyme                  | NA                                  |
| Acid-sensing ion channel 3 blocker                  | Q9UHC3 | 30   | 0.9954 | 0.996 | Ion channel             | Ligand-gated ion channel            |
| Acrosin inhibitor                                   | P10323 | 60   | 0.9999 | 1.000 | Enzyme                  | Protease                            |
| Activated CDC42 kinase 1 inhibitor                  | Q07912 | 498  | 0.9924 | 0.992 | Enzyme                  | Kinase                              |
| Activin receptor type-1 antagonist                  | Q04771 | 139  | 0.9826 | 0.982 | Enzyme                  | Kinase                              |
| Activin receptor type-1B antagonist                 | P36896 | 48   | 0.9348 | 0.935 | Enzyme                  | Kinase                              |
| Acyl-CoA (8-3)-desaturase inhibitor                 | O60427 | 39   | 0.9736 | 0.974 | Enzyme                  | NA                                  |
| Acyl-protein thioesterase 1 inhibitor               | O75608 | 8    | 0.8876 | 0.89  | Enzyme                  | Hydrolase                           |
| Acyl-protein thioesterase 2 inhibitor               | O95372 | 7    | 0.9916 | 0.992 | Enzyme                  | Hydrolase                           |
| Adenomatous polyposis coli protein inhibitor        | P25054 | 19   | 0.9665 | 0.967 | Other cytosolic protein | NA                                  |
| Adenosine deaminase inhibitor                       | P00813 | 46   | 0.9965 | 0.997 | Enzyme                  | Hydrolase                           |
| Adenosine kinase inhibitor                          | P55263 | 405  | 0.9989 | 0.999 | Enzyme                  | NA                                  |
| Adenosine receptor A1 agonist                       | P30542 | 220  | 0.9935 | 0.994 | Membrane receptor       | Family A G protein-coupled receptor |
| Adenosine receptor A1 antagonist                    | P30542 | 1169 | 0.9862 | 0.986 | Membrane receptor       | Family A G protein-coupled receptor |
| Adenosine receptor A2a agonist                      | P29274 | 266  | 0.9984 | 0.998 | Membrane receptor       | Family A G protein-coupled receptor |
| Adenosine receptor A2a antagonist                   | P29274 | 1568 | 0.9885 | 0.989 | Membrane receptor       | Family A G protein-coupled receptor |
| Adenosine receptor A2b agonist                      | P29275 | 197  | 0.9966 | 0.997 | Membrane receptor       | Family A G protein-coupled receptor |
| Adenosine receptor A2b antagonist                   | P29275 | 1146 | 0.9917 | 0.992 | Membrane receptor       | Family A G protein-coupled receptor |
| Adenosine receptor A3 agonist                       | P0DMS8 | 172  | 0.9924 | 0.992 | Membrane receptor       | Family A G protein-coupled receptor |
| Adenosine receptor A3 antagonist                    | P0DMS8 | 1193 | 0.9842 | 0.984 | Membrane receptor       | Family A G protein-                 |

|                                                                                  |        |       |        |       |                      |                                     |
|----------------------------------------------------------------------------------|--------|-------|--------|-------|----------------------|-------------------------------------|
|                                                                                  |        |       |        |       |                      | coupled receptor                    |
| Adenosylhomocysteinase inhibitor                                                 | P23526 | 133   | 0.9998 | 1.000 | Enzyme               | Hydrolase                           |
| Adenylate cyclase type 1 inhibitor                                               | Q08828 | 92    | 0.9953 | 0.995 | Enzyme               | NA                                  |
| Adenylate cyclase type 5 inhibitor                                               | O95622 | 24    | 0.9996 | 1.000 | Enzyme               | Lyase                               |
| Adenylate cyclase type 8 inhibitor                                               | P40145 | 17    | 0.9999 | 1.000 | Enzyme               | Lyase                               |
| Adenylosuccinate synthetase isozyme 2 inhibitor                                  | P30520 | 3     | 1.000  | 1.000 | Enzyme               | Ligase                              |
| ADP-ribosyl cyclase/cyclic ADP-ribose hydrolase 1 inhibitor                      | P28907 | 143   | 0.997  | 0.996 | Enzyme               | NA                                  |
| Advanced glycosylation end product-specific receptor antagonist                  | Q15109 | 24    | 0.9984 | 0.998 | Unclassified protein | NA                                  |
| Alcohol dehydrogenase 1A inhibitor                                               | P07327 | 16    | 0.9997 | 0.98  | Enzyme               | Oxidoreductase                      |
| Alcohol dehydrogenase 1C inhibitor                                               | P00326 | 6     | 1.000  | 1.000 | Enzyme               | Oxidoreductase                      |
| Alcohol dehydrogenase class-3 inhibitor                                          | P11766 | 64    | 0.9999 | 1.000 | Enzyme               | Oxidoreductase                      |
| Aldehyde dehydrogenase 1A1 inhibitor                                             | P00352 | 12507 | 0.8857 | 0.886 | Enzyme               | Oxidoreductase                      |
| Aldehyde dehydrogenase family 1 member A3 inhibitor                              | P47895 | 38    | 0.9864 | 0.987 | Enzyme               | Oxidoreductase                      |
| Aldehyde dehydrogenase X, mitochondrial inhibitor                                | P30837 | 7     | 0.9857 | 0.986 | Enzyme               | Oxidoreductase                      |
| Aldehyde dehydrogenase, dimeric NADP-preferring inhibitor                        | P30838 | 37    | 0.9806 | 0.977 | Enzyme               | Oxidoreductase                      |
| Aldehyde dehydrogenase, mitochondrial inhibitor                                  | P05091 | 74    | 0.9736 | 0.974 | Enzyme               | Oxidoreductase                      |
| Aldehyde oxidase inhibitor                                                       | Q06278 | 14    | 0.9398 | 0.933 | Enzyme               | Oxidoreductase                      |
| Aldo-keto reductase family 1 member A1 inhibitor                                 | P14550 | 27    | 0.9982 | 0.998 | Enzyme               | Oxidoreductase                      |
| Aldo-keto reductase family 1 member B1 inhibitor                                 | P15121 | 715   | 0.9964 | 0.996 | Enzyme               | Oxidoreductase                      |
| Aldo-keto reductase family 1 member B10 inhibitor                                | O60218 | 99    | 0.9936 | 0.994 | Enzyme               | Oxidoreductase                      |
| Aldo-keto reductase family 1 member C1 inhibitor                                 | Q04828 | 83    | 0.9881 | 0.988 | Enzyme               | Oxidoreductase                      |
| Aldo-keto reductase family 1 member C2 inhibitor                                 | P52895 | 134   | 0.9917 | 0.992 | Enzyme               | Oxidoreductase                      |
| Aldo-keto reductase family 1 member C3 inhibitor                                 | P42330 | 527   | 0.9911 | 0.991 | Enzyme               | NA                                  |
| Aldo-keto reductase family 1 member C4 inhibitor                                 | P17516 | 14    | 0.9729 | 0.973 | Enzyme               | Oxidoreductase                      |
| ALK tyrosine kinase receptor antagonist                                          | Q9UM73 | 1724  | 0.9896 | 0.99  | Enzyme               | Kinase                              |
| Alkaline phosphatase, germ cell type inhibitor                                   | P10696 | 77    | 0.9345 | 0.932 | Enzyme               | Phosphatase                         |
| Alkaline phosphatase, tissue-nonspecific isozyme inhibitor                       | P05186 | 182   | 0.9836 | 0.984 | Enzyme               | NA                                  |
| All-trans-retinol dehydrogenase [NAD(+)] ADH1B inhibitor                         | P00325 | 7     | 1.000  | 1.000 | Enzyme               | Oxidoreductase                      |
| Alpha-(1,3)-fucosyltransferase 7 inhibitor                                       | Q11130 | 5     | 0.9998 | 1.000 | Enzyme               | Transferase                         |
| Alpha-1,3-mannosyl-glycoprotein 2-beta-N-acetylglucosaminyltransferase inhibitor | P26572 | 6     | 1.000  | 1.000 | Enzyme               | Transferase                         |
| Alpha-1,6-mannosyl-glycoprotein 2-beta-N-acetylglucosaminyltransferase inhibitor | Q10469 | 196   | 0.9966 | 0.996 | Enzyme               | Transferase                         |
| Alpha-1A adrenergic receptor agonist                                             | P35348 | 193   | 0.9955 | 0.996 | Membrane receptor    | Family A G protein-coupled receptor |

|                                                                                 |        |      |        |       |                      |                                     |
|---------------------------------------------------------------------------------|--------|------|--------|-------|----------------------|-------------------------------------|
| Alpha-1A adrenergic receptor antagonist                                         | P35348 | 884  | 0.982  | 0.982 | Membrane receptor    | Family A G protein-coupled receptor |
| Alpha-1B adrenergic receptor agonist                                            | P35368 | 46   | 0.9766 | 0.977 | Membrane receptor    | Family A G protein-coupled receptor |
| Alpha-1B adrenergic receptor antagonist                                         | P35368 | 1030 | 0.9845 | 0.984 | Membrane receptor    | Family A G protein-coupled receptor |
| Alpha-1D adrenergic receptor agonist                                            | P25100 | 44   | 0.9992 | 0.999 | Membrane receptor    | Family A G protein-coupled receptor |
| Alpha-1D adrenergic receptor antagonist                                         | P25100 | 603  | 0.9896 | 0.99  | Membrane receptor    | Family A G protein-coupled receptor |
| Alpha-2A adrenergic receptor agonist                                            | P08913 | 94   | 0.9998 | 1.000 | Membrane receptor    | Family A G protein-coupled receptor |
| Alpha-2A adrenergic receptor antagonist                                         | P08913 | 502  | 0.9747 | 0.974 | Membrane receptor    | Family A G protein-coupled receptor |
| Alpha-2B adrenergic receptor agonist                                            | P18089 | 61   | 0.9991 | 0.999 | Membrane receptor    | Family A G protein-coupled receptor |
| Alpha-2B adrenergic receptor antagonist                                         | P18089 | 237  | 0.9679 | 0.968 | Membrane receptor    | Family A G protein-coupled receptor |
| Alpha-2C adrenergic receptor agonist                                            | P18825 | 111  | 0.9989 | 0.999 | Membrane receptor    | Family A G protein-coupled receptor |
| Alpha-2C adrenergic receptor antagonist                                         | P18825 | 381  | 0.9788 | 0.979 | Membrane receptor    | Family A G protein-coupled receptor |
| Alpha-amylase 1A inhibitor                                                      | P0DUB6 | 5    | 0.9988 | 0.999 | Enzyme               | Hydrolase                           |
| Alpha-crystallin B chain inhibitor                                              | P02511 | 6    | 1.000  | 1.000 | Unclassified protein | NA                                  |
| Alpha-enolase inhibitor                                                         | P06733 | 5    | 0.8748 | 0.866 | Enzyme               | NA                                  |
| Alpha-galactosidase A inhibitor                                                 | P06280 | 359  | 0.8163 | 0.814 | Enzyme               | Hydrolase                           |
| Alpha-ketoglutarate-dependent dioxygenase alkB homolog 3 inhibitor              | Q96Q83 | 38   | 0.9995 | 1.000 | Enzyme               | Oxidoreductase                      |
| Alpha-ketoglutarate-dependent dioxygenase FTO inhibitor                         | Q9C0B1 | 105  | 0.9992 | 0.999 | Enzyme               | Oxidoreductase                      |
| Alpha-mannosidase 2 inhibitor                                                   | Q16706 | 4    | 1.000  | 1.000 | Enzyme               | Hydrolase                           |
| Alpha-synuclein inhibitor                                                       | P37840 | 140  | 0.9943 | 0.994 | Unclassified protein | NA                                  |
| Amiloride-sensitive amine oxidase [copper-containing] inhibitor                 | P19801 | 30   | 0.999  | 0.999 | Enzyme               | NA                                  |
| Amiloride-sensitive sodium channel subunit alpha blocker                        | P37088 | 37   | 1.000  | 1.000 | Ion channel          | Ligand-gated ion channel            |
| Amine oxidase [flavin-containing] A inhibitor                                   | P21397 | 1329 | 0.9834 | 0.983 | Enzyme               | Oxidoreductase                      |
| Amine oxidase [flavin-containing] B inhibitor                                   | P27338 | 2519 | 0.9833 | 0.983 | Enzyme               | Oxidoreductase                      |
| Aminoacyl tRNA synthase complex-interacting multifunctional protein 2 inhibitor | Q13155 | 4    | 0.9997 | 1.000 | Unclassified protein | NA                                  |
| Aminopeptidase B inhibitor                                                      | Q9H4A4 | 7    | 0.9995 | 1.000 | Enzyme               | Protease                            |
| Aminopeptidase N inhibitor                                                      | P15144 | 236  | 0.9898 | 0.99  | Enzyme               | Protease                            |

|                                                          |        |      |        |       |                         |                                     |
|----------------------------------------------------------|--------|------|--------|-------|-------------------------|-------------------------------------|
| AMP deaminase 1 inhibitor                                | P23109 | 3    | 1.000  | 1.000 | Enzyme                  | Hydrolase                           |
| AMP deaminase 2 inhibitor                                | Q01433 | 21   | 1.000  | 1.000 | Enzyme                  | NA                                  |
| AMP deaminase 3 inhibitor                                | Q01432 | 44   | 0.9999 | 1.000 | Enzyme                  | Hydrolase                           |
| Amphiregulin inhibitor                                   | P15514 | 5    | 1.000  | 1.000 | Secreted protein        | NA                                  |
| Amyloid-beta precursor protein inhibitor                 | P05067 | 575  | 0.9801 | 0.98  | Membrane receptor       | NA                                  |
| Androgen receptor agonist                                | P10275 | 352  | 0.9984 | 0.999 | Transcription factor    | Nuclear receptor                    |
| Androgen receptor antagonist                             | P10275 | 1364 | 0.9937 | 0.993 | Transcription factor    | Nuclear receptor                    |
| Angiopoietin-1 receptor antagonist                       | Q02763 | 774  | 0.9851 | 0.984 | Enzyme                  | Kinase                              |
| Angiotensin-converting enzyme 2 inhibitor                | Q9BYF1 | 107  | 0.9994 | 0.999 | Enzyme                  | Protease                            |
| Angiotensin-converting enzyme inhibitor                  | P12821 | 464  | 0.9973 | 0.997 | Enzyme                  | Protease                            |
| Anoctamin-1 inhibitor                                    | Q5XXA6 | 51   | 0.9889 | 0.989 | Ion channel             | Other ion channel                   |
| Anoctamin-2 inhibitor                                    | Q9NQ90 | 7    | 0.9177 | 0.919 | Ion channel             | Other ion channel                   |
| Anthrax toxin receptor 2 antagonist                      | P58335 | 6    | 0.9979 | 0.998 | Unclassified protein    | NA                                  |
| AP2-associated protein kinase 1 inhibitor                | Q2M2I8 | 72   | 0.9783 | 0.979 | Enzyme                  | Kinase                              |
| Apelin receptor agonist                                  | P35414 | 183  | 0.9926 | 0.993 | Membrane receptor       | Family A G protein-coupled receptor |
| Apelin receptor antagonist                               | P35414 | 13   | 0.9337 | 0.934 | Membrane receptor       | Family A G protein-coupled receptor |
| Apolipoprotein B-100 inhibitor                           | P04114 | 42   | 1.000  | 1.000 | Secreted protein        | NA                                  |
| Apoptosis regulator Bcl-2 inhibitor                      | P10415 | 1172 | 0.9906 | 0.99  | Ion channel             | Other ion channel                   |
| Appetite-regulating hormone inhibitor                    | Q9UBU3 | 40   | 1.000  | 1.000 | Secreted protein        | NA                                  |
| Arachidonate 5-lipoxygenase-activating protein inhibitor | P20292 | 1911 | 0.9988 | 0.999 | Other cytosolic protein | NA                                  |
| Arginase-1 inhibitor                                     | P05089 | 95   | 1.000  | 1.000 | Enzyme                  | Hydrolase                           |
| Arginase-2, mitochondrial inhibitor                      | P78540 | 41   | 1.000  | 1.000 | Enzyme                  | Hydrolase                           |
| Aromatase inhibitor                                      | P11511 | 1558 | 0.9931 | 0.993 | Enzyme                  | Cytochrome P450                     |
| Arsenite methyltransferase inhibitor                     | Q9HBK9 | 8    | 1.000  | 1.000 | Enzyme                  | Transferase                         |
| Aryl hydrocarbon receptor agonist                        | P35869 | 15   | 0.9905 | 0.983 | Transcription factor    | NA                                  |
| Aryl hydrocarbon receptor antagonist                     | P35869 | 9    | 0.9962 | 0.996 | Transcription factor    | NA                                  |
| Arylamine N-acetyltransferase 1 inhibitor                | P18440 | 26   | 0.9999 | 1.000 | Enzyme                  | Transferase                         |
| Asparagine synthetase [glutamine-hydrolyzing] inhibitor  | P08243 | 3    | 1.000  | 1.000 | Enzyme                  | NA                                  |
| Aspartyl aminopeptidase inhibitor                        | Q9ULA0 | 4    | 1.000  | 1.000 | Enzyme                  | Protease                            |
| ATPase family AAA domain-containing protein 2 inhibitor  | Q6PL18 | 28   | 0.9777 | 0.978 | Epigenetic regulator    | Reader                              |
| ATP-binding cassette sub-family C member 8 inhibitor     | Q09428 | 19   | 0.9734 | 0.975 | Transporter             | Primary active transporter          |

|                                                                         |        |      |        |       |                                              |                                     |
|-------------------------------------------------------------------------|--------|------|--------|-------|----------------------------------------------|-------------------------------------|
| ATP-binding cassette sub-family C member 9 inhibitor                    | O60706 | 14   | 0.9798 | 0.981 | Transporter                                  | Primary active transporter          |
| ATP-citrate synthase inhibitor                                          | P53396 | 44   | 0.9952 | 0.996 | Enzyme                                       | Transferase                         |
| ATP-dependent Clp protease proteolytic subunit, mitochondrial inhibitor | Q16740 | 3    | 0.8476 | 0.852 | Enzyme                                       | Hydrolase                           |
| ATP-dependent DNA helicase Q1 inhibitor                                 | P46063 | 1431 | 0.8322 | 0.831 | Enzyme                                       | NA                                  |
| ATP-dependent RNA helicase DDX3X inhibitor                              | O00571 | 26   | 0.9723 | 0.973 | Enzyme                                       | NA                                  |
| ATP-dependent translocase ABCB1 inhibitor                               | P08183 | 967  | 0.9758 | 0.975 | Transporter                                  | Primary active transporter          |
| ATP-sensitive inward rectifier potassium channel 1 blocker              | P48048 | 441  | 0.9958 | 0.996 | Ion channel                                  | Voltage-gated ion channel           |
| ATP-sensitive inward rectifier potassium channel 11 blocker             | Q14654 | 93   | 0.9999 | 1.000 | Ion channel                                  | Voltage-gated ion channel           |
| Atrial natriuretic peptide receptor 1 agonist                           | P16066 | 40   | 0.9961 | 0.996 | Enzyme                                       | Lyase                               |
| Atrial natriuretic peptide receptor 3 antagonist                        | P17342 | 4    | 1.000  | 1.000 | Membrane receptor                            | NA                                  |
| Atypical chemokine receptor 3 agonist                                   | P25106 | 485  | 0.9971 | 0.997 | Membrane receptor                            | Family A G protein-coupled receptor |
| Atypical chemokine receptor 3 antagonist                                | P25106 | 11   | 0.8401 | 0.844 | Membrane receptor                            | Family A G protein-coupled receptor |
| Atypical kinase COQ8B, mitochondrial inhibitor                          | Q96D53 | 3    | 0.983  | 0.983 | Enzyme                                       | Kinase                              |
| Aurora kinase A inhibitor                                               | O14965 | 2229 | 0.9801 | 0.98  | Enzyme                                       | Kinase                              |
| Aurora kinase B inhibitor                                               | Q96GD4 | 1545 | 0.9797 | 0.98  | Enzyme                                       | Kinase                              |
| Aurora kinase C inhibitor                                               | Q9UQB9 | 47   | 0.9219 | 0.915 | Enzyme                                       | Kinase                              |
| B1 bradykinin receptor antagonist                                       | P46663 | 660  | 0.998  | 0.998 | Membrane receptor                            | Family A G protein-coupled receptor |
| B2 bradykinin receptor antagonist                                       | P30411 | 332  | 0.9989 | 0.999 | Membrane receptor                            | Family A G protein-coupled receptor |
| Baculoviral IAP repeat-containing protein 2 activator                   | Q13490 | 44   | 1.000  | 1.000 | Enzyme                                       | NA                                  |
| Baculoviral IAP repeat-containing protein 2 inhibitor                   | Q13490 | 462  | 0.9998 | 1.000 | Enzyme                                       | NA                                  |
| Baculoviral IAP repeat-containing protein 3 inhibitor                   | Q13489 | 102  | 0.9999 | 1.000 | Enzyme                                       | NA                                  |
| B-cell CLL/lymphoma 9 protein inhibitor                                 | O00512 | 11   | 0.9505 | 0.951 | Unclassified protein                         | NA                                  |
| B-cell lymphoma 3 protein inhibitor                                     | P20749 | 8    | 1.000  | 1.000 | Unclassified protein                         | NA                                  |
| B-cell lymphoma 6 protein inhibitor                                     | P41182 | 95   | 0.9906 | 0.99  | Transcription factor                         | NA                                  |
| B-cell receptor CD22 antagonist                                         | P20273 | 21   | 1.000  | 1.000 | Surface antigen; Adhesion; Membrane receptor | NA                                  |
| Bcl-2 homologous antagonist/killer inhibitor                            | Q16611 | 25   | 0.9992 | 0.998 | Unclassified protein                         | NA                                  |
| Bcl2-associated agonist of cell death inhibitor                         | Q92934 | 48   | 0.9704 | 0.971 | Other cytosolic protein                      | NA                                  |
| Bcl-2-like protein 1 inhibitor                                          | Q07817 | 804  | 0.9941 | 0.994 | Ion channel                                  | Other ion channel                   |



|                                                                                                                            |        |      |        |       |                         |                                     |
|----------------------------------------------------------------------------------------------------------------------------|--------|------|--------|-------|-------------------------|-------------------------------------|
| Bcl-2-like protein 11 inhibitor                                                                                            | O43521 | 19   | 0.9994 | 0.999 | Unclassified protein    | NA                                  |
| Bcl-2-like protein 2 inhibitor                                                                                             | Q92843 | 16   | 0.8823 | 0.879 | Other cytosolic protein | NA                                  |
| Bcl-2-related protein A1 inhibitor                                                                                         | Q16548 | 56   | 0.9841 | 0.985 | Unclassified protein    | NA                                  |
| BCL-6 corepressor inhibitor                                                                                                | Q6W2J9 | 11   | 1.000  | 1.000 | Unclassified protein    | NA                                  |
| BDNF/NT-3 growth factors receptor agonist                                                                                  | Q16620 | 16   | 0.9977 | 0.998 | Enzyme                  | Kinase                              |
| BDNF/NT-3 growth factors receptor antagonist                                                                               | Q16620 | 244  | 0.9684 | 0.96  | Enzyme                  | Kinase                              |
| Beta-1 adrenergic receptor agonist                                                                                         | P08588 | 528  | 0.9981 | 0.998 | Membrane receptor       | Family A G protein-coupled receptor |
| Beta-1 adrenergic receptor antagonist                                                                                      | P08588 | 382  | 0.9872 | 0.987 | Membrane receptor       | Family A G protein-coupled receptor |
| Beta-1,4-mannosyl-glycoprotein 4-beta-N-acetylglucosaminyltransferase inhibitor                                            | Q09327 | 14   | 1.000  | 1.000 | Enzyme                  | Transferase                         |
| Beta-2 adrenergic receptor agonist                                                                                         | P07550 | 623  | 0.9988 | 0.999 | Membrane receptor       | Family A G protein-coupled receptor |
| Beta-2 adrenergic receptor antagonist                                                                                      | P07550 | 483  | 0.99   | 0.99  | Membrane receptor       | Family A G protein-coupled receptor |
| Beta-3 adrenergic receptor agonist                                                                                         | P13945 | 960  | 0.9991 | 0.999 | Membrane receptor       | Family A G protein-coupled receptor |
| Beta-3 adrenergic receptor antagonist                                                                                      | P13945 | 194  | 0.9844 | 0.984 | Membrane receptor       | Family A G protein-coupled receptor |
| Beta-adrenergic receptor kinase 1 antagonist                                                                               | P25098 | 325  | 0.9731 | 0.972 | Enzyme                  | Kinase                              |
| Beta-adrenergic receptor kinase 2 antagonist                                                                               | P35626 | 33   | 0.9339 | 0.935 | Enzyme                  | Kinase                              |
| Beta-galactosidase inhibitor                                                                                               | P16278 | 16   | 0.9996 | 1.000 | Enzyme                  | Hydrolase                           |
| Beta-galactoside alpha-2,6-sialyltransferase 1 inhibitor                                                                   | P15907 | 18   | 0.9915 | 0.989 | Enzyme                  | Transferase                         |
| Beta-glucuronidase inhibitor                                                                                               | P08236 | 185  | 0.9677 | 0.968 | Enzyme                  | Hydrolase                           |
| Beta-hexosaminidase subunit alpha inhibitor                                                                                | P06865 | 20   | 0.9501 | 0.951 | Enzyme                  | Hydrolase                           |
| Beta-hexosaminidase subunit beta inhibitor                                                                                 | P07686 | 21   | 0.9943 | 0.994 | Enzyme                  | Hydrolase                           |
| Betaine--homocysteine S-methyltransferase 1 inhibitor                                                                      | Q93088 | 14   | 1.000  | 1.000 | Enzyme                  | Transferase                         |
| Beta-secretase 1 inhibitor                                                                                                 | P56817 | 6537 | 0.9868 | 0.987 | Enzyme                  | Protease                            |
| Beta-secretase 2 inhibitor                                                                                                 | Q9Y5Z0 | 1595 | 0.9964 | 0.997 | Enzyme                  | Protease                            |
| Bifunctional 3'-5' exonuclease/ATP-dependent helicase WRN inhibitor                                                        | Q14191 | 7    | 1.000  | 1.000 | Enzyme                  | NA                                  |
| Bifunctional epoxide hydrolase 2 inhibitor                                                                                 | P34913 | 1650 | 0.9901 | 0.99  | Enzyme                  | Protease                            |
| Bifunctional methylenetetrahydrofolate dehydrogenase/cyclohydrolase, mitochondrial inhibitor                               | P13995 | 37   | 0.9999 | 1.000 | Enzyme                  | Oxidoreductase                      |
| Bifunctional phosphoribosylaminoimidazole carboxylase/phosphoribosylaminoimidazole succinocarboxamide synthetase inhibitor | P22234 | 38   | 1.000  | 1.000 | Enzyme                  | NA                                  |
| Bifunctional purine biosynthesis protein ATIC inhibitor                                                                    | P31939 | 28   | 0.9694 | 0.97  | Enzyme                  | NA                                  |

|                                                                              |        |      |        |       |                      |                                     |
|------------------------------------------------------------------------------|--------|------|--------|-------|----------------------|-------------------------------------|
| Bile acid receptor agonist                                                   | Q96RI1 | 446  | 0.9925 | 0.993 | Transcription factor | Nuclear receptor                    |
| Bile acid receptor antagonist                                                | Q96RI1 | 202  | 0.9726 | 0.973 | Transcription factor | Nuclear receptor                    |
| Bile salt export pump inhibitor                                              | O95342 | 153  | 0.8378 | 0.837 | Transporter          | Primary active transporter          |
| Bile salt-activated lipase inhibitor                                         | P19835 | 6    | 1.000  | 1.000 | Enzyme               | Hydrolase                           |
| Bis(5'-adenosyl)-triphosphatase inhibitor                                    | P49789 | 8    | 1.000  | 1.000 | Enzyme               | Hydrolase                           |
| BMP-2-inducible protein kinase inhibitor                                     | Q9NSY1 | 19   | 0.9527 | 0.955 | Enzyme               | Kinase                              |
| Bombesin receptor subtype-3 agonist                                          | P32247 | 305  | 0.9987 | 0.999 | Membrane receptor    | Family A G protein-coupled receptor |
| Bombesin receptor subtype-3 antagonist                                       | P32247 | 40   | 0.9991 | 0.999 | Membrane receptor    | Family A G protein-coupled receptor |
| Bone morphogenetic protein 1 inhibitor                                       | P13497 | 757  | 0.9999 | 1.000 | Enzyme               | Protease                            |
| Bone morphogenetic protein 4 inhibitor                                       | P12644 | 20   | 1.000  | 1.000 | Enzyme               | Protease                            |
| Bone morphogenetic protein receptor type-1A antagonist                       | P36894 | 26   | 0.8888 | 0.89  | Enzyme               | Kinase                              |
| Bone morphogenetic protein receptor type-1B antagonist                       | O00238 | 18   | 0.8879 | 0.89  | Enzyme               | Kinase                              |
| Bone morphogenetic protein receptor type-2 antagonist                        | Q13873 | 13   | 0.9179 | 0.918 | Enzyme               | Kinase                              |
| Branched-chain-amino-acid aminotransferase, cytosolic inhibitor              | P54687 | 16   | 0.9999 | 1.000 | Enzyme               | Transferase                         |
| Branched-chain-amino-acid aminotransferase, mitochondrial inhibitor          | O15382 | 117  | 0.9961 | 0.996 | Enzyme               | Transferase                         |
| Breakpoint cluster region protein inhibitor                                  | P11274 | 378  | 0.9915 | 0.992 | Enzyme               | Kinase                              |
| Breast cancer type 1 susceptibility protein inhibitor                        | P38398 | 66   | 0.9417 | 0.925 | Enzyme               | NA                                  |
| Broad substrate specificity ATP-binding cassette transporter ABCG2 inhibitor | Q9UNQ0 | 736  | 0.9896 | 0.99  | Transporter          | Primary active transporter          |
| Bromodomain adjacent to zinc finger domain protein 2A inhibitor              | Q9UIF9 | 33   | 0.9917 | 0.992 | Epigenetic regulator | Reader                              |
| Bromodomain adjacent to zinc finger domain protein 2B inhibitor              | Q9UIF8 | 23   | 0.9601 | 0.961 | Epigenetic regulator | Reader                              |
| Bromodomain and PHD finger-containing protein 3 inhibitor                    | Q9ULD4 | 21   | 0.97   | 0.97  | Epigenetic regulator | Reader                              |
| Bromodomain testis-specific protein inhibitor                                | Q58F21 | 61   | 0.9661 | 0.965 | Epigenetic regulator | Reader                              |
| Bromodomain-containing protein 1 inhibitor                                   | O95696 | 72   | 0.9979 | 0.998 | Epigenetic regulator | Reader                              |
| Bromodomain-containing protein 2 inhibitor                                   | P25440 | 268  | 0.9958 | 0.996 | Epigenetic regulator | Reader                              |
| Bromodomain-containing protein 3 inhibitor                                   | Q15059 | 271  | 0.9965 | 0.997 | Epigenetic regulator | Reader                              |
| Bromodomain-containing protein 4 inhibitor                                   | O60885 | 1975 | 0.9884 | 0.988 | Epigenetic regulator | Reader                              |
| Bromodomain-containing protein 7 inhibitor                                   | Q9NPI1 | 18   | 0.9999 | 1.000 | Epigenetic regulator | Reader                              |
| Bromodomain-containing protein 9 inhibitor                                   | Q9H8M2 | 141  | 0.9926 | 0.993 | Epigenetic regulator | Reader                              |
| BTB/POZ domain-containing protein KCTD12 inhibitor                           | Q96CX2 | 17   | 1.000  | 1.000 | Unclassified protein | NA                                  |
| Butyrophilin subfamily 3 member A1 inhibitor                                 | O00481 | 17   | 0.9996 | 1.000 | Unclassified protein | NA                                  |

|                                                                             |                   |      |        |       |                      |                                     |
|-----------------------------------------------------------------------------|-------------------|------|--------|-------|----------------------|-------------------------------------|
| C-1-tetrahydrofolate synthase, cytoplasmic inhibitor                        | P11586            | 13   | 1.000  | 1.000 | Enzyme               | NA                                  |
| C3a anaphylatoxin chemotactic receptor agonist                              | A8K2H7,<br>Q16581 | 131  | 0.9924 | 0.992 | Membrane receptor    | Family A G protein-coupled receptor |
| C3a anaphylatoxin chemotactic receptor antagonist                           | A8K2H7,<br>Q16581 | 108  | 0.9987 | 0.999 | Membrane receptor    | Family A G protein-coupled receptor |
| C5a anaphylatoxin chemotactic receptor 1 antagonist                         | P21730            | 326  | 0.9957 | 0.996 | Membrane receptor    | Family A G protein-coupled receptor |
| CAAX prenyl protease 2 inhibitor                                            | Q9Y256            | 17   | 0.9991 | 0.999 | Enzyme               | Protease                            |
| CAD protein inhibitor                                                       | P27708            | 6    | 0.9911 | 0.991 | Enzyme               | NA                                  |
| Calcitonin gene-related peptide 1 inhibitor                                 | P06881            | 14   | 0.9828 | 0.981 | Secreted protein     | NA                                  |
| Calcitonin gene-related peptide type 1 receptor antagonist                  | Q16602            | 478  | 0.9973 | 0.997 | Membrane receptor    | Family B G protein-coupled receptor |
| Calcitonin receptor agonist                                                 | P30988            | 63   | 1.000  | 1.000 | Membrane receptor    | Family B G protein-coupled receptor |
| Calcitonin receptor antagonist                                              | P30988            | 12   | 1.000  | 1.000 | Membrane receptor    | Family B G protein-coupled receptor |
| Calcium release-activated calcium channel protein 1 blocker                 | Q96D31            | 18   | 0.9881 | 0.987 | Ion channel          | Other ion channel                   |
| Calcium/calmodulin-dependent protein kinase kinase 2 inhibitor              | Q96RR4            | 75   | 0.9728 | 0.973 | Enzyme               | Kinase                              |
| Calcium/calmodulin-dependent protein kinase type 1D inhibitor               | Q8IU85            | 24   | 0.9136 | 0.915 | Enzyme               | Kinase                              |
| Calcium/calmodulin-dependent protein kinase type II subunit alpha inhibitor | Q9UQM7            | 20   | 0.8624 | 0.868 | Enzyme               | Kinase                              |
| Calcium/calmodulin-dependent protein kinase type II subunit delta inhibitor | Q13557            | 141  | 0.9875 | 0.987 | Enzyme               | Kinase                              |
| Calcium/calmodulin-dependent protein kinase type II subunit gamma inhibitor | Q13555            | 56   | 0.9499 | 0.949 | Enzyme               | Kinase                              |
| Calcium-activated potassium channel subunit alpha-1 blocker                 | Q12791            | 45   | 0.9675 | 0.967 | Ion channel          | Voltage-gated ion channel           |
| Calmodulin-1 inhibitor                                                      | P0DP23            | 6    | 0.9293 | 0.931 | Unclassified protein | NA                                  |
| Calpain small subunit 1 inhibitor                                           | P04632            | 66   | 0.9999 | 1.000 | Enzyme               | Protease                            |
| Calpain-1 catalytic subunit inhibitor                                       | P07384            | 580  | 0.9982 | 0.998 | Enzyme               | Protease                            |
| Calpain-2 catalytic subunit inhibitor                                       | P17655            | 157  | 0.9999 | 1.000 | Enzyme               | Protease                            |
| Calpain-9 inhibitor                                                         | O14815            | 8    | 0.9998 | 1.000 | Enzyme               | Hydrolase                           |
| cAMP and cAMP-inhibited cGMP 3',5'-cyclic phosphodiesterase 10A inhibitor   | Q9Y233            | 3653 | 0.9937 | 0.994 | Enzyme               | Phosphodiesterase                   |
| cAMP-dependent protein kinase catalytic subunit alpha inhibitor             | P17612            | 95   | 0.9631 | 0.962 | Enzyme               | Kinase                              |
| cAMP-dependent protein kinase catalytic subunit gamma inhibitor             | P22612            | 169  | 0.9815 | 0.981 | Enzyme               | Kinase                              |
| cAMP-specific 3',5'-cyclic phosphodiesterase 4A activator                   | P27815            | 13   | 0.9934 | 0.985 | Enzyme               | Phosphodiesterase                   |
| cAMP-specific 3',5'-cyclic phosphodiesterase 4A inhibitor                   | P27815            | 1765 | 0.991  | 0.991 | Enzyme               | Phosphodiesterase                   |
| cAMP-specific 3',5'-cyclic phosphodiesterase 4B inhibitor                   | Q07343            | 1366 | 0.9859 | 0.986 | Enzyme               | Phosphodiesterase                   |
| cAMP-specific 3',5'-cyclic phosphodiesterase 4C inhibitor                   | Q08493            | 108  | 0.9865 | 0.986 | Enzyme               | Phosphodiesterase                   |

|                                                                            |        |      |        |       |                   |                                     |
|----------------------------------------------------------------------------|--------|------|--------|-------|-------------------|-------------------------------------|
| cAMP-specific 3',5'-cyclic phosphodiesterase 4D inhibitor                  | Q08499 | 787  | 0.9813 | 0.98  | Enzyme            | Phosphodiesterase                   |
| cAMP-specific 3',5'-cyclic phosphodiesterase 7B inhibitor                  | Q9NP56 | 44   | 0.968  | 0.969 | Enzyme            | Phosphodiesterase                   |
| Cannabinoid receptor 1 agonist                                             | P21554 | 910  | 0.989  | 0.989 | Membrane receptor | Family A G protein-coupled receptor |
| Cannabinoid receptor 1 antagonist                                          | P21554 | 1708 | 0.9858 | 0.986 | Membrane receptor | Family A G protein-coupled receptor |
| Cannabinoid receptor 2 agonist                                             | P34972 | 2010 | 0.9922 | 0.992 | Membrane receptor | Family A G protein-coupled receptor |
| Cannabinoid receptor 2 antagonist                                          | P34972 | 1210 | 0.9918 | 0.992 | Membrane receptor | Family A G protein-coupled receptor |
| Carbamoyl-phosphate synthase [ammonia], mitochondrial allosteric inhibitor | P31327 | 15   | 0.9583 | 0.959 | Enzyme            | Ligase                              |
| Carbamoyl-phosphate synthase [ammonia], mitochondrial inhibitor            | P31327 | 15   | 0.9583 | 0.959 | Enzyme            | Ligase                              |
| Carbonic anhydrase 1 inhibitor                                             | P00915 | 5137 | 0.9935 | 0.994 | Enzyme            | Lyase                               |
| Carbonic anhydrase 12 inhibitor                                            | O43570 | 3217 | 0.9914 | 0.991 | Enzyme            | Lyase                               |
| Carbonic anhydrase 13 inhibitor                                            | Q8N1Q1 | 90   | 0.9767 | 0.977 | Enzyme            | Lyase                               |
| Carbonic anhydrase 14 inhibitor                                            | Q9ULX7 | 519  | 0.9892 | 0.989 | Enzyme            | Lyase                               |
| Carbonic anhydrase 2 inhibitor                                             | P00918 | 6015 | 0.9935 | 0.994 | Enzyme            | Lyase                               |
| Carbonic anhydrase 3 inhibitor                                             | P07451 | 87   | 0.9608 | 0.961 | Enzyme            | Lyase                               |
| Carbonic anhydrase 4 inhibitor                                             | P22748 | 926  | 0.993  | 0.993 | Enzyme            | Lyase                               |
| Carbonic anhydrase 5A, mitochondrial inhibitor                             | P35218 | 343  | 0.9807 | 0.981 | Enzyme            | Lyase                               |
| Carbonic anhydrase 5B, mitochondrial inhibitor                             | Q9Y2D0 | 274  | 0.9917 | 0.992 | Enzyme            | Lyase                               |
| Carbonic anhydrase 6 inhibitor                                             | P23280 | 171  | 0.9737 | 0.974 | Enzyme            | Lyase                               |
| Carbonic anhydrase 7 inhibitor                                             | P43166 | 857  | 0.9916 | 0.992 | Enzyme            | Lyase                               |
| Carbonic anhydrase 9 inhibitor                                             | Q16790 | 4225 | 0.992  | 0.992 | Enzyme            | Lyase                               |
| Carbonic anhydrase-related protein 11 inhibitor                            | O75493 | 26   | 0.9997 | 1.000 | Enzyme            | NA                                  |
| Carbonyl reductase [NADPH] 1 inhibitor                                     | P16152 | 17   | 0.9916 | 0.99  | Enzyme            | Oxidoreductase                      |
| Carboxypeptidase A1 inhibitor                                              | P15085 | 48   | 0.9996 | 1.000 | Enzyme            | Protease                            |
| Carboxypeptidase A2 inhibitor                                              | P48052 | 11   | 1.000  | 1.000 | Enzyme            | Protease                            |
| Carboxypeptidase A4 inhibitor                                              | Q9UI42 | 11   | 1.000  | 1.000 | Enzyme            | Protease                            |
| Carboxypeptidase B inhibitor                                               | P15086 | 63   | 0.9849 | 0.985 | Enzyme            | Protease                            |
| Carboxypeptidase B2 inhibitor                                              | Q96IY4 | 198  | 0.9999 | 1.000 | Enzyme            | Protease                            |
| Carboxypeptidase N catalytic chain inhibitor                               | P15169 | 20   | 1.000  | 1.000 | Enzyme            | Protease                            |
| Carnitine O-palmitoyltransferase 1, liver isoform inhibitor                | P50416 | 490  | 0.997  | 0.997 | Enzyme            | Transferase                         |
| Carnitine O-palmitoyltransferase 1, muscle isoform inhibitor               | Q92523 | 166  | 0.9855 | 0.986 | Transporter       | Group translocator                  |

|                                                             |        |      |        |       |                      |             |
|-------------------------------------------------------------|--------|------|--------|-------|----------------------|-------------|
| Carnitine O-palmitoyltransferase 2, mitochondrial inhibitor | P23786 | 113  | 0.9959 | 0.996 | Enzyme               | Transferase |
| Casein kinase I isoform alpha inhibitor                     | P48729 | 83   | 0.962  | 0.962 | Enzyme               | Kinase      |
| Casein kinase I isoform delta inhibitor                     | P48730 | 447  | 0.9853 | 0.985 | Enzyme               | Kinase      |
| Casein kinase I isoform epsilon inhibitor                   | P49674 | 298  | 0.996  | 0.996 | Enzyme               | Kinase      |
| Casein kinase I isoform gamma-1 inhibitor                   | Q9HCP0 | 12   | 0.8218 | 0.825 | Enzyme               | Kinase      |
| Casein kinase I isoform gamma-2 inhibitor                   | P78368 | 30   | 0.929  | 0.929 | Enzyme               | Kinase      |
| Casein kinase II subunit alpha 3 inhibitor                  | Q8NEV1 | 34   | 0.9675 | 0.968 | Enzyme               | Kinase      |
| Casein kinase II subunit alpha inhibitor                    | P68400 | 696  | 0.9848 | 0.983 | Enzyme               | Kinase      |
| Casein kinase II subunit alpha' inhibitor                   | P19784 | 160  | 0.9895 | 0.99  | Enzyme               | Kinase      |
| Casein kinase II subunit beta inhibitor                     | P67870 | 349  | 0.9992 | 0.999 | Enzyme               | Kinase      |
| Caspase-1 inhibitor                                         | P29466 | 601  | 0.9896 | 0.989 | Enzyme               | Protease    |
| Caspase-10 inhibitor                                        | Q92851 | 8    | 0.9886 | 0.989 | Enzyme               | Protease    |
| Caspase-2 inhibitor                                         | P42575 | 33   | 0.999  | 0.999 | Enzyme               | Protease    |
| Caspase-3 activator                                         | P42574 | 6    | 0.9996 | 1.000 | Enzyme               | Protease    |
| Caspase-3 inhibitor                                         | P42574 | 962  | 0.9969 | 0.997 | Enzyme               | Protease    |
| Caspase-4 inhibitor                                         | P49662 | 24   | 0.9454 | 0.944 | Enzyme               | Protease    |
| Caspase-5 inhibitor                                         | P51878 | 20   | 0.9114 | 0.913 | Enzyme               | Protease    |
| Caspase-6 inhibitor                                         | P55212 | 193  | 0.9981 | 0.995 | Enzyme               | Protease    |
| Caspase-7 inhibitor                                         | P55210 | 420  | 0.9962 | 0.996 | Enzyme               | Protease    |
| Caspase-8 inhibitor                                         | Q14790 | 297  | 0.9961 | 0.996 | Enzyme               | Protease    |
| Caspase-9 inhibitor                                         | P55211 | 28   | 0.9893 | 0.99  | Enzyme               | Protease    |
| Cat eye syndrome critical region protein 2 inhibitor        | Q9BXF3 | 59   | 0.9729 | 0.967 | Epigenetic regulator | Reader      |
| Catechol O-methyltransferase inhibitor                      | P21964 | 114  | 0.9981 | 0.998 | Enzyme               | Transferase |
| Catenin beta-1 inhibitor                                    | P35222 | 53   | 0.9629 | 0.96  | Unclassified protein | NA          |
| Cathepsin B inhibitor                                       | P07858 | 942  | 0.9917 | 0.992 | Enzyme               | Protease    |
| Cathepsin D inhibitor                                       | P07339 | 1117 | 0.9911 | 0.991 | Enzyme               | Protease    |
| Cathepsin E inhibitor                                       | P14091 | 87   | 0.9719 | 0.972 | Enzyme               | Protease    |
| Cathepsin F inhibitor                                       | Q9UBX1 | 28   | 0.9942 | 0.994 | Enzyme               | Protease    |
| Cathepsin G inhibitor                                       | P08311 | 157  | 0.9764 | 0.977 | Enzyme               | Protease    |
| Cathepsin K inhibitor                                       | P43235 | 1647 | 0.9955 | 0.995 | Enzyme               | Protease    |
| Cathepsin L2 inhibitor                                      | O60911 | 131  | 0.9966 | 0.997 | Enzyme               | Protease    |
| Cathepsin S inhibitor                                       | P25774 | 1930 | 0.9968 | 0.997 | Enzyme               | Protease    |

|                                                         |        |      |        |       |                      |                                     |
|---------------------------------------------------------|--------|------|--------|-------|----------------------|-------------------------------------|
| Cathepsin Z inhibitor                                   | Q9UBR2 | 5    | 0.8002 | 0.801 | Enzyme               | Protease                            |
| C-C chemokine receptor type 1 antagonist                | P32246 | 483  | 0.9965 | 0.997 | Membrane receptor    | Family A G protein-coupled receptor |
| C-C chemokine receptor type 10 antagonist               | P46092 | 33   | 1.000  | 1.000 | Membrane receptor    | Family A G protein-coupled receptor |
| C-C chemokine receptor type 2 antagonist                | P41597 | 1041 | 0.9964 | 0.996 | Membrane receptor    | Family A G protein-coupled receptor |
| C-C chemokine receptor type 3 antagonist                | P51677 | 846  | 0.9951 | 0.995 | Membrane receptor    | Family A G protein-coupled receptor |
| C-C chemokine receptor type 4 antagonist                | P51679 | 326  | 0.9916 | 0.992 | Membrane receptor    | Family A G protein-coupled receptor |
| C-C chemokine receptor type 5 agonist                   | P51681 | 8    | 0.9139 | 0.915 | Membrane receptor    | Family A G protein-coupled receptor |
| C-C chemokine receptor type 5 antagonist                | P51681 | 1451 | 0.9919 | 0.992 | Membrane receptor    | Family A G protein-coupled receptor |
| C-C chemokine receptor type 6 agonist                   | P51684 | 25   | 1.000  | 1.000 | Membrane receptor    | Family A G protein-coupled receptor |
| C-C chemokine receptor type 6 antagonist                | P51684 | 11   | 0.9098 | 0.91  | Membrane receptor    | Family A G protein-coupled receptor |
| C-C chemokine receptor type 8 antagonist                | P51685 | 148  | 0.9966 | 0.997 | Membrane receptor    | Family A G protein-coupled receptor |
| C-C chemokine receptor type 9 antagonist                | P51686 | 302  | 0.9975 | 0.998 | Membrane receptor    | Family A G protein-coupled receptor |
| C-C chemokine receptor-like 2 antagonist                | O00421 | 150  | 1.000  | 1.000 | Membrane receptor    | Family A G protein-coupled receptor |
| C-C motif chemokine 2 inhibitor                         | P13500 | 3    | 0.9678 | 0.809 | Membrane receptor    | Family A G protein-coupled receptor |
| C-C motif chemokine 5 inhibitor                         | P13501 | 27   | 1.000  | 1.000 | Membrane receptor    | Family A G protein-coupled receptor |
| CCR4-NOT transcription complex subunit 7 inhibitor      | Q9UIV1 | 10   | 1.000  | 1.000 | Enzyme               | Hydrolase                           |
| CD40 ligand inhibitor                                   | P29965 | 6    | 0.9997 | 1.000 | Secreted protein     | NA                                  |
| CD63 antigen inhibitor                                  | P08962 | 11   | 1.000  | 1.000 | Surface antigen      | NA                                  |
| CDK-activating kinase assembly factor MAT1 inhibitor    | P51948 | 69   | 0.9168 | 0.92  | Unclassified protein | NA                                  |
| Cell division control protein 42 homolog inhibitor      | P60953 | 10   | 0.8351 | 0.837 | Enzyme               | Hydrolase                           |
| Cell division cycle 7-related protein kinase inhibitor  | O00311 | 406  | 0.9988 | 0.999 | Enzyme               | Kinase                              |
| Cellular tumor antigen p53 inhibitor                    | P04637 | 764  | 0.9923 | 0.992 | Transcription factor | NA                                  |
| Centromere-associated protein E inhibitor               | Q02224 | 22   | 1.000  | 1.000 | Unclassified protein | NA                                  |
| Ceramide glucosyltransferase inhibitor                  | Q16739 | 91   | 0.9999 | 1.000 | Enzyme               | Transferase                         |
| cGMP-dependent 3',5'-cyclic phosphodiesterase inhibitor | O00408 | 708  | 0.9915 | 0.99  | Enzyme               | Phosphodiesterase                   |

|                                                                                    |        |      |        |       |                      |                                     |
|------------------------------------------------------------------------------------|--------|------|--------|-------|----------------------|-------------------------------------|
| cGMP-dependent protein kinase 2 inhibitor                                          | Q13237 | 6    | 0.8759 | 0.879 | Enzyme               | Kinase                              |
| cGMP-inhibited 3',5'-cyclic phosphodiesterase 3A inhibitor                         | Q14432 | 240  | 0.9695 | 0.969 | Enzyme               | Phosphodiesterase                   |
| cGMP-inhibited 3',5'-cyclic phosphodiesterase 3B inhibitor                         | Q13370 | 112  | 0.9859 | 0.986 | Enzyme               | Phosphodiesterase                   |
| cGMP-specific 3',5'-cyclic phosphodiesterase inhibitor                             | O76074 | 1709 | 0.9893 | 0.989 | Enzyme               | Phosphodiesterase                   |
| Chemerin-like receptor 1 agonist                                                   | Q99788 | 14   | 1.000  | 1.000 | Membrane receptor    | Family A G protein-coupled receptor |
| Chemokine-like receptor 1 antagonist                                               | Q99788 | 22   | 1.000  | 1.000 | Membrane receptor    | Family A G protein-coupled receptor |
| Chitotriosidase-1 inhibitor                                                        | Q13231 | 99   | 0.9997 | 1.000 | Enzyme               | NA                                  |
| Cholecystokinin receptor type A agonist                                            | P32238 | 164  | 0.9998 | 1.000 | Membrane receptor    | Family A G protein-coupled receptor |
| Cholecystokinin receptor type A antagonist                                         | P32238 | 143  | 0.9839 | 0.984 | Membrane receptor    | Family A G protein-coupled receptor |
| Cholesteryl ester transfer protein inhibitor                                       | P11597 | 768  | 0.9982 | 0.998 | Ion channel          | Other ion channel                   |
| Choline kinase alpha inhibitor                                                     | P35790 | 73   | 0.9955 | 0.996 | Enzyme               | Transferase                         |
| Choline O-acetyltransferase inhibitor                                              | P28329 | 20   | 0.942  | 0.942 | Enzyme               | Transferase                         |
| Choline/ethanolaminephosphotransferase 1 inhibitor                                 | Q9Y6K0 | 39   | 1.000  | 1.000 | Enzyme               | Transferase                         |
| Cholinesterase inhibitor                                                           | P06276 | 1612 | 0.989  | 0.989 | Enzyme               | Hydrolase                           |
| Chromobox protein homolog 7 inhibitor                                              | O95931 | 8    | 0.9501 | 0.951 | Epigenetic regulator | Reader                              |
| Chymase inhibitor                                                                  | P23946 | 433  | 0.9979 | 0.998 | Enzyme               | Protease                            |
| Chymotrypsin-C inhibitor                                                           | Q99895 | 73   | 0.9511 | 0.952 | Enzyme               | Protease                            |
| Chymotrypsin-like elastase family member 1 inhibitor                               | Q9UNI1 | 17   | 0.9897 | 0.99  | Enzyme               | Protease                            |
| Chymotrypsin-like protease CTRL-1 inhibitor                                        | P40313 | 11   | 1.000  | 1.000 | Enzyme               | Protease                            |
| Chymotrypsinogen B inhibitor                                                       | P17538 | 72   | 0.9694 | 0.97  | Enzyme               | Protease                            |
| Citron Rho-interacting kinase inhibitor                                            | O14578 | 6    | 0.8323 | 0.836 | Enzyme               | Kinase                              |
| Clathrin heavy chain 1 inhibitor                                                   | Q00610 | 3    | 1.000  | 1.000 | Structural protein   | NA                                  |
| CMP-N-acetylneuraminate-beta-galactosamide-alpha-2,3-sialyltransferase 1 inhibitor | Q11201 | 4    | 0.9324 | 0.93  | Enzyme               | Transferase                         |
| Coagulation factor IX inhibitor                                                    | P00740 | 393  | 0.995  | 0.995 | Enzyme               | Protease                            |
| Coagulation factor V inhibitor                                                     | P12259 | 7    | 0.8854 | 0.888 | Secreted protein     | NA                                  |
| Coagulation factor VII inhibitor                                                   | P08709 | 491  | 0.9936 | 0.994 | Enzyme               | Protease                            |
| Coagulation factor X inhibitor                                                     | P00742 | 5178 | 0.9944 | 0.994 | Enzyme               | Protease                            |
| Coagulation factor XI inhibitor                                                    | P03951 | 1000 | 0.9977 | 0.998 | Enzyme               | Protease                            |
| Coagulation factor XII inhibitor                                                   | P00748 | 123  | 0.985  | 0.985 | Enzyme               | Protease                            |
| Coagulation factor XIII A chain inhibitor                                          | P00488 | 95   | 0.9964 | 0.997 | Enzyme               | Aminoacyltransferase                |

|                                                                            |        |      |        |       |                      |                                     |
|----------------------------------------------------------------------------|--------|------|--------|-------|----------------------|-------------------------------------|
| Cocaine esterase inhibitor                                                 | O00748 | 131  | 0.9881 | 0.988 | Enzyme               | Hydrolase                           |
| Coiled-coil domain-containing protein 6 inhibitor                          | Q16204 | 13   | 0.8685 | 0.87  | Unclassified protein | NA                                  |
| Collagenase 3 inhibitor                                                    | P45452 | 2412 | 0.9902 | 0.99  | Enzyme               | Protease                            |
| Complement C1r subcomponent inhibitor                                      | P00736 | 47   | 0.993  | 0.994 | Enzyme               | Protease                            |
| Complement C1s subcomponent inhibitor                                      | P09871 | 105  | 0.9875 | 0.988 | Enzyme               | Protease                            |
| Complement C3 inhibitor                                                    | P01024 | 26   | 1.000  | 1.000 | Secreted protein     | NA                                  |
| Complement component C9 inhibitor                                          | P02748 | 3    | 1.000  | 1.000 | Unclassified protein | NA                                  |
| Complement factor B inhibitor                                              | P00751 | 39   | 0.9804 | 0.98  | Enzyme               | Protease                            |
| Complement factor D inhibitor                                              | P00746 | 897  | 0.9974 | 0.997 | Enzyme               | Protease                            |
| Cone cGMP-specific 3',5'-cyclic phosphodiesterase subunit alpha' inhibitor | P51160 | 35   | 0.9463 | 0.935 | Enzyme               | Phosphodiesterase                   |
| COP9 signalosome complex subunit 5 inhibitor                               | Q92905 | 12   | 0.9218 | 0.923 | Enzyme               | Hydrolase                           |
| Core-binding factor subunit beta inhibitor                                 | Q13951 | 32   | 1.000  | 1.000 | Unclassified protein | NA                                  |
| Corticosteroid-binding globulin inhibitor                                  | P08185 | 29   | 0.9999 | 1.000 | Secreted protein     | NA                                  |
| Corticotropin-releasing factor receptor 1 agonist                          | P34998 | 21   | 1.000  | 1.000 | Membrane receptor    | Family B G protein-coupled receptor |
| Corticotropin-releasing factor receptor 1 antagonist                       | P34998 | 1207 | 0.9968 | 0.997 | Membrane receptor    | Family B G protein-coupled receptor |
| Corticotropin-releasing factor receptor 2 agonist                          | Q13324 | 26   | 1.000  | 1.000 | Membrane receptor    | Family B G protein-coupled receptor |
| Corticotropin-releasing factor receptor 2 antagonist                       | Q13324 | 18   | 0.9935 | 0.994 | Membrane receptor    | Family B G protein-coupled receptor |
| CREB-binding protein inhibitor                                             | Q92793 | 297  | 0.9752 | 0.975 | Epigenetic regulator | Reader; Writer                      |
| C-terminal-binding protein 2 inhibitor                                     | P56545 | 13   | 1.000  | 1.000 | Unclassified protein | NA                                  |
| Cullin-4A inhibitor                                                        | Q13619 | 24   | 0.9824 | 0.984 | Unclassified protein | NA                                  |
| CX3C chemokine receptor 1 antagonist                                       | P49238 | 9    | 1.000  | 1.000 | Membrane receptor    | Family A G protein-coupled receptor |
| C-X-C chemokine receptor type 1 antagonist                                 | P25024 | 174  | 0.9814 | 0.982 | Membrane receptor    | Family A G protein-coupled receptor |
| C-X-C chemokine receptor type 2 antagonist                                 | P25025 | 576  | 0.9951 | 0.995 | Membrane receptor    | Family A G protein-coupled receptor |
| C-X-C chemokine receptor type 3 agonist                                    | P49682 | 253  | 0.9987 | 0.999 | Membrane receptor    | Family A G protein-coupled receptor |
| C-X-C chemokine receptor type 3 antagonist                                 | P49682 | 637  | 0.9997 | 1.000 | Membrane receptor    | Family A G protein-coupled receptor |
| C-X-C chemokine receptor type 4 agonist                                    | P61073 | 115  | 0.9992 | 0.999 | Membrane receptor    | Family A G protein-coupled receptor |
| C-X-C chemokine receptor type 4 antagonist                                 | P61073 | 397  | 0.9937 | 0.994 | Membrane receptor    | Family A G protein-coupled receptor |



|                                                           |        |      |        |       |                         |                                     |
|-----------------------------------------------------------|--------|------|--------|-------|-------------------------|-------------------------------------|
| C-X-C chemokine receptor type 5 antagonist                | P32302 | 39   | 1.000  | 1.000 | Membrane receptor       | Family A G protein-coupled receptor |
| C-X-C chemokine receptor type 6 antagonist                | O00574 | 41   | 1.000  | 1.000 | Membrane receptor       | Family A G protein-coupled receptor |
| C-X-C motif chemokine 10 inhibitor                        | P02778 | 165  | 1.000  | 1.000 | Secreted protein        | NA                                  |
| Cyclic AMP-dependent transcription factor ATF-1 inhibitor | P18846 | 17   | 1.000  | 1.000 | Transcription factor    | NA                                  |
| Cyclic GMP-AMP synthase inhibitor                         | Q8N884 | 120  | 0.9924 | 0.993 | Enzyme                  | Transferase                         |
| Cyclin-A1 inhibitor                                       | P78396 | 53   | 0.9782 | 0.979 | Other cytosolic protein | NA                                  |
| Cyclin-A2 inhibitor                                       | P20248 | 1433 | 0.9838 | 0.984 | Other cytosolic protein | NA                                  |
| Cyclin-C inhibitor                                        | P24863 | 245  | 0.9755 | 0.975 | Other cytosolic protein | NA                                  |
| Cyclin-dependent kinase 1 inhibitor                       | P06493 | 1727 | 0.9817 | 0.982 | Enzyme                  | Kinase                              |
| Cyclin-dependent kinase 10 inhibitor                      | Q15131 | 5    | 0.9351 | 0.936 | Enzyme                  | NA                                  |
| Cyclin-dependent kinase 12 inhibitor                      | Q9NYV4 | 27   | 0.9884 | 0.988 | Enzyme                  | Kinase                              |
| Cyclin-dependent kinase 13 inhibitor                      | Q14004 | 3    | 0.9128 | 0.915 | Enzyme                  | NA                                  |
| Cyclin-dependent kinase 14 inhibitor                      | O94921 | 64   | 0.958  | 0.959 | Enzyme                  | Kinase                              |
| Cyclin-dependent kinase 18 inhibitor                      | Q07002 | 5    | 0.9094 | 0.912 | Enzyme                  | Kinase                              |
| Cyclin-dependent kinase 19 inhibitor                      | Q9BWU1 | 60   | 0.9926 | 0.993 | Enzyme                  | Kinase                              |
| Cyclin-dependent kinase 2 inhibitor                       | P24941 | 1533 | 0.9816 | 0.981 | Enzyme                  | Kinase                              |
| Cyclin-dependent kinase 2-associated protein 1 inhibitor  | O14519 | 17   | 1.000  | 1.000 | Unclassified protein    | NA                                  |
| Cyclin-dependent kinase 3 inhibitor                       | Q00526 | 7    | 0.8666 | 0.829 | Enzyme                  | Kinase                              |
| Cyclin-dependent kinase 4 inhibitor                       | P11802 | 1659 | 0.9854 | 0.985 | Enzyme                  | Kinase                              |
| Cyclin-dependent kinase 5 activator 1 inhibitor           | Q15078 | 4    | 1.000  | 1.000 | Enzyme                  | Kinase                              |
| Cyclin-dependent kinase 5 inhibitor                       | Q00535 | 137  | 0.9765 | 0.977 | Enzyme                  | Kinase                              |
| Cyclin-dependent kinase 6 inhibitor                       | Q00534 | 316  | 0.9916 | 0.991 | Enzyme                  | Kinase                              |
| Cyclin-dependent kinase 7 inhibitor                       | P50613 | 120  | 0.9786 | 0.978 | Enzyme                  | Kinase                              |
| Cyclin-dependent kinase 8 inhibitor                       | P49336 | 294  | 0.9915 | 0.992 | Enzyme                  | Kinase                              |
| Cyclin-dependent kinase 9 inhibitor                       | P50750 | 723  | 0.9794 | 0.979 | Enzyme                  | Kinase                              |
| Cyclin-dependent kinase inhibitor 1 inhibitor             | P38936 | 7    | 0.8446 | 0.847 | Other cytosolic protein | NA                                  |
| Cyclin-dependent kinase-like 1 inhibitor                  | Q00532 | 4    | 0.8498 | 0.853 | Enzyme                  | Kinase                              |
| Cyclin-dependent kinases regulatory subunit 1 inhibitor   | P61024 | 22   | 1.000  | 1.000 | Unclassified protein    | NA                                  |
| Cyclin-G-associated kinase inhibitor                      | O14976 | 56   | 0.9681 | 0.968 | Enzyme                  | Kinase                              |
| Cyclin-H inhibitor                                        | P51946 | 147  | 0.9788 | 0.979 | Other cytosolic protein | NA                                  |
| Cyclin-K inhibitor                                        | O75909 | 63   | 0.9645 | 0.965 | Enzyme                  | Kinase                              |

|                                                               |        |      |        |       |                         |                                            |
|---------------------------------------------------------------|--------|------|--------|-------|-------------------------|--------------------------------------------|
| Cyclin-T1 inhibitor                                           | O60563 | 311  | 0.9986 | 0.999 | Other cytosolic protein | NA                                         |
| Cystathionine beta-synthase inhibitor                         | P35520 | 10   | 0.9945 | 0.995 | Enzyme                  | NA                                         |
| Cystathionine gamma-lyase inhibitor                           | P32929 | 28   | 0.9845 | 0.985 | Enzyme                  | Lyase                                      |
| Cysteine protease ATG4B inhibitor                             | Q9Y4P1 | 177  | 0.9123 | 0.911 | Enzyme                  | NA                                         |
| Cysteinyl leukotriene receptor 1 antagonist                   | Q9Y271 | 477  | 0.9973 | 0.997 | Membrane receptor       | Family A G protein-coupled receptor        |
| Cysteinyl leukotriene receptor 2 antagonist                   | Q9NS75 | 71   | 0.9809 | 0.98  | Membrane receptor       | Family A G protein-coupled receptor        |
| Cystic fibrosis transmembrane conductance regulator inhibitor | P13569 | 61   | 0.9938 | 0.994 | Ion channel             | Other ion channel                          |
| Cystine/glutamate transporter inhibitor                       | Q9UPY5 | 15   | 0.9537 | 0.955 | Transporter             | Electrochemical transporter                |
| Cytidine deaminase inhibitor                                  | P32320 | 12   | 1.000  | 1.000 | Enzyme                  | Hydrolase                                  |
| Cytochrome b-245 heavy chain inhibitor                        | P04839 | 6    | 1.000  | 1.000 | Transporter             | Transmembrane 1-electron transfer carriers |
| Cytochrome b-c1 complex subunit 7 inhibitor                   | P14927 | 5    | 1.000  | 1.000 | Transporter             | Transmembrane 1-electron transfer carriers |
| Cytochrome c oxidase subunit 2 inhibitor                      | P00403 | 8    | 0.955  | 0.956 | Transporter             | Primary active transporter                 |
| Cytochrome P450 11B1, mitochondrial inhibitor                 | P15538 | 919  | 0.9983 | 0.998 | Enzyme                  | Cytochrome P450                            |
| Cytochrome P450 11B2, mitochondrial inhibitor                 | P19099 | 1228 | 0.9976 | 0.998 | Enzyme                  | Cytochrome P450                            |
| Cytochrome P450 1A1 inhibitor                                 | P04798 | 285  | 0.9884 | 0.988 | Enzyme                  | Cytochrome P450                            |
| Cytochrome P450 1A2 inhibitor                                 | P05177 | 1040 | 0.9344 | 0.934 | Enzyme                  | Cytochrome P450                            |
| Cytochrome P450 1B1 inhibitor                                 | Q16678 | 300  | 0.9941 | 0.994 | Enzyme                  | Cytochrome P450                            |
| Cytochrome P450 26A1 inhibitor                                | O43174 | 136  | 0.9998 | 1.000 | Enzyme                  | Cytochrome P450                            |
| Cytochrome P450 26B1 inhibitor                                | Q9NR63 | 14   | 0.9208 | 0.922 | Enzyme                  | Cytochrome P450                            |
| Cytochrome P450 2A13 inhibitor                                | Q16696 | 5    | 0.9595 | 0.962 | Enzyme                  | Cytochrome P450                            |
| Cytochrome P450 2A6 inhibitor                                 | P11509 | 177  | 0.9979 | 0.998 | Enzyme                  | Cytochrome P450                            |
| Cytochrome P450 2B6 activator                                 | P20813 | 3    | 0.9901 | 0.99  | Enzyme                  | Cytochrome P450                            |
| Cytochrome P450 2B6 inhibitor                                 | P20813 | 104  | 0.9408 | 0.942 | Enzyme                  | Cytochrome P450                            |
| Cytochrome P450 2C18 inhibitor                                | P33260 | 12   | 1.000  | 1.000 | Enzyme                  | Cytochrome P450                            |
| Cytochrome P450 2C19 inhibitor                                | P33261 | 3228 | 0.8894 | 0.888 | Enzyme                  | Cytochrome P450                            |
| Cytochrome P450 2C8 inhibitor                                 | P10632 | 206  | 0.8699 | 0.866 | Enzyme                  | Cytochrome P450                            |
| Cytochrome P450 2C9 inhibitor                                 | P11712 | 3615 | 0.8839 | 0.883 | Enzyme                  | Cytochrome P450                            |
| Cytochrome P450 2D6 inhibitor                                 | P10635 | 3516 | 0.9069 | 0.906 | Enzyme                  | Cytochrome P450                            |

|                                                   |        |      |        |       |                      |                                     |
|---------------------------------------------------|--------|------|--------|-------|----------------------|-------------------------------------|
| Cytochrome P450 2E1 inhibitor                     | P05181 | 42   | 0.9557 | 0.957 | Enzyme               | Cytochrome P450                     |
| Cytochrome P450 2J2 inhibitor                     | P51589 | 36   | 0.9125 | 0.915 | Enzyme               | NA                                  |
| Cytochrome P450 3A4 inhibitor                     | P08684 | 7098 | 0.9003 | 0.9   | Enzyme               | Cytochrome P450                     |
| Cytochrome P450 3A7 inhibitor                     | P24462 | 12   | 0.9294 | 0.933 | Enzyme               | Oxidoreductase                      |
| Cytochrome P450 4Z1 inhibitor                     | Q86W10 | 3    | 1.000  | 1.000 | Enzyme               | Oxidoreductase                      |
| Cytoplasmic tyrosine-protein kinase BMX inhibitor | P51813 | 123  | 0.9666 | 0.965 | Enzyme               | Kinase                              |
| Cytosol aminopeptidase inhibitor                  | P28838 | 32   | 0.9993 | 0.999 | Enzyme               | Protease                            |
| Cytosolic carboxypeptidase 2 inhibitor            | Q5U5Z8 | 4    | 0.9991 | 0.999 | Enzyme               | Protease                            |
| Cytosolic phospholipase A2 beta inhibitor         | P0C869 | 31   | 0.9999 | 1.000 | Enzyme               | Hydrolase                           |
| Cytosolic phospholipase A2 gamma inhibitor        | Q9UP65 | 3    | 0.9832 | 0.984 | Enzyme               | Hydrolase                           |
| Cytosolic phospholipase A2 inhibitor              | P47712 | 238  | 0.9988 | 0.999 | Enzyme               | NA                                  |
| D(1A) dopamine receptor agonist                   | P21728 | 237  | 0.993  | 0.993 | Membrane receptor    | Family A G protein-coupled receptor |
| D(1A) dopamine receptor antagonist                | P21728 | 359  | 0.978  | 0.978 | Membrane receptor    | Family A G protein-coupled receptor |
| D(1B) dopamine receptor agonist                   | P21918 | 6    | 0.9992 | 0.999 | Membrane receptor    | Family A G protein-coupled receptor |
| D(1B) dopamine receptor antagonist                | P21918 | 111  | 0.9812 | 0.981 | Membrane receptor    | Family A G protein-coupled receptor |
| D(2) dopamine receptor agonist                    | P14416 | 473  | 0.9936 | 0.994 | Membrane receptor    | Family A G protein-coupled receptor |
| D(2) dopamine receptor antagonist                 | P14416 | 3226 | 0.9875 | 0.987 | Membrane receptor    | Family A G protein-coupled receptor |
| D(3) dopamine receptor agonist                    | P35462 | 312  | 0.9967 | 0.997 | Membrane receptor    | Family A G protein-coupled receptor |
| D(3) dopamine receptor antagonist                 | P35462 | 2277 | 0.9899 | 0.99  | Membrane receptor    | Family A G protein-coupled receptor |
| D(4) dopamine receptor agonist                    | P21917 | 118  | 0.9881 | 0.988 | Membrane receptor    | Family A G protein-coupled receptor |
| D(4) dopamine receptor antagonist                 | P21917 | 1126 | 0.9898 | 0.99  | Membrane receptor    | Family A G protein-coupled receptor |
| D-3-phosphoglycerate dehydrogenase inhibitor      | O43175 | 271  | 0.997  | 0.997 | Enzyme               | Oxidoreductase                      |
| D-amino-acid oxidase inhibitor                    | P14920 | 332  | 0.9994 | 0.999 | Enzyme               | Oxidoreductase                      |
| D-aspartate oxidase inhibitor                     | Q99489 | 3    | 0.9834 | 0.944 | Enzyme               | Oxidoreductase                      |
| DCN1-like protein 1 inhibitor                     | Q96GG9 | 123  | 0.9977 | 0.998 | Unclassified protein | NA                                  |
| dCTP pyrophosphatase 1 inhibitor                  | Q9H773 | 203  | 0.9974 | 0.997 | Enzyme               | Hydrolase                           |
| Death-associated protein kinase 1 inhibitor       | P53355 | 35   | 0.9457 | 0.945 | Enzyme               | Kinase                              |

|                                                                           |                   |      |        |       |                      |                                     |
|---------------------------------------------------------------------------|-------------------|------|--------|-------|----------------------|-------------------------------------|
| Death-associated protein kinase 2 inhibitor                               | Q9UIK4            | 18   | 0.9048 | 0.91  | Enzyme               | Kinase                              |
| Death-associated protein kinase 3 inhibitor                               | O43293            | 44   | 0.9162 | 0.911 | Enzyme               | Kinase                              |
| Dedicator of cytokinesis protein 2 inhibitor                              | Q92608            | 5    | 1.000  | 1.000 | Unclassified protein | NA                                  |
| Delta(24)-sterol reductase inhibitor                                      | Q15392            | 12   | 1.000  | 1.000 | Enzyme               | Oxidoreductase                      |
| Delta-type opioid receptor agonist                                        | P41143            | 618  | 0.9893 | 0.989 | Membrane receptor    | Family A G protein-coupled receptor |
| Delta-type opioid receptor antagonist                                     | P41143            | 1530 | 0.9889 | 0.989 | Membrane receptor    | Family A G protein-coupled receptor |
| Deoxycytidine kinase inhibitor                                            | P27707            | 96   | 1.000  | 1.000 | Enzyme               | Transferase                         |
| Deoxyhypusine hydroxylase inhibitor                                       | Q9BU89            | 5    | 0.9556 | 0.958 | Enzyme               | Oxidoreductase                      |
| Deoxyhypusine synthase inhibitor                                          | P49366            | 8    | 0.9886 | 0.989 | Enzyme               | Transferase                         |
| Deoxyuridine 5'-triphosphate nucleotidohydrolase, mitochondrial inhibitor | P33316            | 173  | 1.000  | 1.000 | Enzyme               | NA                                  |
| DEP domain-containing mTOR-interacting protein inhibitor                  | Q8TB45            | 7    | 1.000  | 1.000 | Unclassified protein | NA                                  |
| DGAT1 protein inhibitor                                                   | Q9BRH5            | 15   | 0.999  | 0.999 | Enzyme               | Transferase                         |
| Diacylglycerol kinase alpha inhibitor                                     | P23743            | 12   | 0.9774 | 0.813 | Enzyme               | Transferase                         |
| Diacylglycerol kinase zeta inhibitor                                      | Q13574            | 7    | 1.000  | 1.000 | Enzyme               | Transferase                         |
| Diacylglycerol lipase-alpha inhibitor                                     | Q9Y4D2            | 135  | 0.9992 | 0.999 | Enzyme               | Hydrolase                           |
| Diacylglycerol lipase-beta inhibitor                                      | Q8NCG7            | 8    | 0.9969 | 0.997 | Enzyme               | NA                                  |
| Diacylglycerol O-acyltransferase 1 inhibitor                              | Q9BRH5,<br>O75907 | 1118 | 0.9988 | 0.999 | Enzyme               | Transferase                         |
| Diacylglycerol O-acyltransferase 2 inhibitor                              | Q96PD7            | 49   | 0.9873 | 0.987 | Enzyme               | Transferase                         |
| Dickkopf-related protein 1 inhibitor                                      | O94907            | 31   | 0.9975 | 0.998 | Secreted protein     | NA                                  |
| Dihydrofolate reductase inhibitor                                         | P00374            | 888  | 0.9964 | 0.996 | Enzyme               | Oxidoreductase                      |
| Dihydroorotate dehydrogenase (quinone), mitochondrial inhibitor           | Q02127            | 708  | 0.9964 | 0.996 | Enzyme               | Oxidoreductase                      |
| Dihydropteridine reductase inhibitor                                      | P09417            | 11   | 1.000  | 1.000 | Enzyme               | Oxidoreductase                      |
| Dihydropyrimidine dehydrogenase [NADP(+)] inhibitor                       | Q12882            | 11   | 1.000  | 1.000 | Enzyme               | NA                                  |
| Dihydroxyacetone phosphate acyltransferase inhibitor                      | O15228            | 3    | 1.000  | 1.000 | Enzyme               | Transferase                         |
| Dipeptidase 1 inhibitor                                                   | P16444            | 10   | 1.000  | 1.000 | Enzyme               | Protease                            |
| Dipeptidyl peptidase 1 inhibitor                                          | P53634            | 659  | 0.9985 | 0.998 | Enzyme               | Protease                            |
| Dipeptidyl peptidase 2 inhibitor                                          | Q9UHL4            | 517  | 0.9988 | 0.999 | Enzyme               | Protease                            |
| Dipeptidyl peptidase 4 inhibitor                                          | P27487            | 3394 | 0.9948 | 0.995 | Enzyme               | Protease                            |
| Dipeptidyl peptidase 8 inhibitor                                          | Q6V1X1            | 574  | 0.9986 | 0.999 | Enzyme               | Protease                            |
| Dipeptidyl peptidase 9 inhibitor                                          | Q86TI2            | 401  | 0.9965 | 0.997 | Enzyme               | Protease                            |
| Diphosphomevalonate decarboxylase inhibitor                               | P53602            | 5    | 1.000  | 1.000 | Enzyme               | Lyase                               |

|                                                                          |        |      |        |       |                       |                |
|--------------------------------------------------------------------------|--------|------|--------|-------|-----------------------|----------------|
| Disabled homolog 2-interacting protein inhibitor                         | Q5VWQ8 | 6    | 0.9583 | 0.959 | Unclassified protein  | NA             |
| Discoidin domain-containing receptor 2 antagonist                        | Q16832 | 193  | 0.9726 | 0.973 | Enzyme                | Kinase         |
| Disintegrin and metalloproteinase domain-containing protein 10 inhibitor | O14672 | 133  | 0.9968 | 0.997 | Enzyme                | Protease       |
| Disintegrin and metalloproteinase domain-containing protein 12 inhibitor | O43184 | 5    | 0.9736 | 0.974 | Enzyme                | Protease       |
| Disintegrin and metalloproteinase domain-containing protein 17 inhibitor | P78536 | 1641 | 0.9971 | 0.997 | Enzyme                | Protease       |
| Disintegrin and metalloproteinase domain-containing protein 33 inhibitor | Q9BZ11 | 12   | 1.000  | 1.000 | Enzyme                | Protease       |
| Disintegrin and metalloproteinase domain-containing protein 8 inhibitor  | P78325 | 27   | 0.9822 | 0.982 | Enzyme                | Protease       |
| Disintegrin and metalloproteinase domain-containing protein 9 inhibitor  | Q13443 | 41   | 0.9868 | 0.986 | Enzyme                | Protease       |
| Disks large homolog 4 inhibitor                                          | P78352 | 33   | 1.000  | 1.000 | Unclassified protein  | NA             |
| DNA (cytosine-5)-methyltransferase 1 inhibitor                           | P26358 | 111  | 0.9888 | 0.989 | Epigenetic regulator  | Writer         |
| DNA (cytosine-5)-methyltransferase 3A inhibitor                          | Q9Y6K1 | 29   | 0.9542 | 0.954 | Epigenetic regulator  | Reader; Writer |
| DNA (cytosine-5)-methyltransferase 3B inhibitor                          | Q9UBC3 | 23   | 0.9726 | 0.973 | Epigenetic regulator  | Reader; Writer |
| DNA (cytosine-5)-methyltransferase 3-like inhibitor                      | Q9UJW3 | 4    | 0.9674 | 0.97  | Epigenetic regulator  | Writer         |
| DNA dC->dU-editing enzyme APOBEC-3A inhibitor                            | P31941 | 209  | 0.9302 | 0.929 | Enzyme                | Hydrolase      |
| DNA dC->dU-editing enzyme APOBEC-3G inhibitor                            | Q9HC16 | 469  | 0.9512 | 0.952 | Enzyme                | Hydrolase      |
| DNA ligase 1 inhibitor                                                   | P18858 | 10   | 0.8219 | 0.826 | Enzyme                | Ligase         |
| DNA nucleotidylexotransferase inhibitor                                  | P04053 | 5    | 1.000  | 1.000 | Enzyme                | Transferase    |
| DNA polymerase alpha catalytic subunit inhibitor                         | P09884 | 33   | 0.9724 | 0.973 | Enzyme                | Transferase    |
| DNA polymerase beta inhibitor                                            | P06746 | 5111 | 0.8611 | 0.861 | Enzyme                | NA             |
| DNA polymerase eta inhibitor                                             | Q9Y253 | 4    | 0.9976 | 0.998 | Enzyme                | Transferase    |
| DNA polymerase kappa inhibitor                                           | Q9UBT6 | 6    | 0.841  | 0.83  | Enzyme                | NA             |
| DNA polymerase lambda inhibitor                                          | Q9UGP5 | 19   | 0.9992 | 0.999 | Enzyme                | NA             |
| DNA polymerase subunit gamma-1 inhibitor                                 | P54098 | 5    | 0.9276 | 0.935 | Enzyme                | Transferase    |
| DNA repair endonuclease XPF inhibitor                                    | Q92889 | 55   | 0.9992 | 0.999 | Enzyme                | Hydrolase      |
| DNA repair protein complementing XP-A cells inhibitor                    | P23025 | 12   | 1.000  | 1.000 | Other nuclear protein | NA             |
| DNA repair protein complementing XP-G cells inhibitor                    | P28715 | 46   | 1.000  | 1.000 | Other nuclear protein | NA             |
| DNA repair protein RAD51 homolog 1 inhibitor                             | Q06609 | 26   | 0.9898 | 0.99  | Unclassified protein  | NA             |
| DNA repair protein RAD52 homolog inhibitor                               | P43351 | 33   | 0.9593 | 0.958 | Other nuclear protein | NA             |
| DNA topoisomerase 1 inhibitor                                            | P11387 | 173  | 0.9914 | 0.992 | Enzyme                | Isomerase      |
| DNA topoisomerase 2-alpha inhibitor                                      | P11388 | 145  | 0.9775 | 0.978 | Enzyme                | Isomerase      |
| DNA topoisomerase 2-beta inhibitor                                       | Q02880 | 108  | 0.9791 | 0.979 | Enzyme                | Isomerase      |
| DNA-(apurinic or apyrimidinic site) endonuclease inhibitor               | P27695 | 102  | 0.9588 | 0.957 | Enzyme                | NA             |

|                                                                                                      |        |      |        |       |                            |                   |
|------------------------------------------------------------------------------------------------------|--------|------|--------|-------|----------------------------|-------------------|
| DNA-3-methyladenine glycosylase inhibitor                                                            | P29372 | 4    | 0.9757 | 0.978 | Enzyme                     | NA                |
| DNA-dependent protein kinase catalytic subunit inhibitor                                             | P78527 | 926  | 0.9892 | 0.989 | Enzyme                     | Kinase            |
| DNA-directed RNA polymerase I subunit RPA1 activator                                                 | O95602 | 19   | 1.000  | 1.000 | Enzyme                     | Transferase       |
| Dolichyl-diphosphooligosaccharide--protein glycosyltransferase 48 kDa subunit inhibitor              | P39656 | 12   | 1.000  | 1.000 | Enzyme                     | NA                |
| Dopamine beta-hydroxylase inhibitor                                                                  | P09172 | 13   | 1.000  | 1.000 | Enzyme                     | Oxidoreductase    |
| Dual 3',5'-cyclic-AMP and -GMP phosphodiesterase 11A inhibitor                                       | Q9HCR9 | 161  | 0.9792 | 0.979 | Enzyme                     | Phosphodiesterase |
| Dual specificity calcium/calmodulin-dependent 3',5'-cyclic nucleotide phosphodiesterase 1A inhibitor | P54750 | 24   | 0.8991 | 0.889 | Enzyme                     | Phosphodiesterase |
| Dual specificity calcium/calmodulin-dependent 3',5'-cyclic nucleotide phosphodiesterase 1B inhibitor | Q01064 | 64   | 0.955  | 0.956 | Enzyme                     | Phosphodiesterase |
| Dual specificity calcium/calmodulin-dependent 3',5'-cyclic nucleotide phosphodiesterase 1C inhibitor | Q14123 | 56   | 0.9967 | 0.997 | Enzyme                     | Phosphodiesterase |
| Dual specificity mitogen-activated protein kinase kinase 1 inhibitor                                 | Q02750 | 887  | 0.9801 | 0.98  | Enzyme                     | Kinase            |
| Dual specificity mitogen-activated protein kinase kinase 2 inhibitor                                 | P36507 | 91   | 0.951  | 0.935 | Enzyme                     | Kinase            |
| Dual specificity mitogen-activated protein kinase kinase 3 inhibitor                                 | P46734 | 11   | 0.8884 | 0.887 | Enzyme                     | Kinase            |
| Dual specificity mitogen-activated protein kinase kinase 4 inhibitor                                 | P45985 | 9    | 0.811  | 0.814 | Enzyme                     | Kinase            |
| Dual specificity mitogen-activated protein kinase kinase 5 inhibitor                                 | Q13163 | 10   | 0.8092 | 0.807 | Enzyme                     | Kinase            |
| Dual specificity mitogen-activated protein kinase kinase 7 inhibitor                                 | O14733 | 141  | 0.9758 | 0.976 | Enzyme                     | Kinase            |
| Dual specificity protein kinase CLK1 inhibitor                                                       | P49759 | 288  | 0.9624 | 0.962 | Enzyme                     | Kinase            |
| Dual specificity protein kinase CLK2 inhibitor                                                       | P49760 | 107  | 0.9546 | 0.955 | Enzyme                     | Kinase            |
| Dual specificity protein kinase CLK3 inhibitor                                                       | P49761 | 47   | 0.9305 | 0.931 | Enzyme                     | Kinase            |
| Dual specificity protein kinase CLK4 inhibitor                                                       | Q9HAZ1 | 341  | 0.9856 | 0.986 | Enzyme                     | Kinase            |
| Dual specificity protein kinase TTK inhibitor                                                        | P33981 | 1034 | 0.9973 | 0.997 | Enzyme                     | Kinase            |
| Dual specificity protein phosphatase 1 inhibitor                                                     | P28562 | 11   | 1.000  | 1.000 | Enzyme                     | Phosphatase       |
| Dual specificity protein phosphatase 22 inhibitor                                                    | Q9NRW4 | 17   | 0.9999 | 1.000 | Enzyme                     | Phosphatase       |
| Dual specificity protein phosphatase 23 inhibitor                                                    | Q9BVJ7 | 3    | 0.9977 | 0.998 | Enzyme                     | Phosphatase       |
| Dual specificity protein phosphatase 3 inhibitor                                                     | P51452 | 179  | 0.9443 | 0.945 | Enzyme                     | Phosphatase       |
| Dual specificity protein phosphatase CDC14A inhibitor                                                | Q9UNH5 | 3    | 0.9999 | 1.000 | Enzyme                     | NA                |
| Dual specificity testis-specific protein kinase 2 inhibitor                                          | Q96S53 | 6    | 1.000  | 1.000 | Enzyme                     | Kinase            |
| Dual specificity tyrosine-phosphorylation-regulated kinase 1A inhibitor                              | Q13627 | 674  | 0.9797 | 0.98  | Enzyme                     | Kinase            |
| Dual specificity tyrosine-phosphorylation-regulated kinase 1B inhibitor                              | Q9Y463 | 289  | 0.9833 | 0.983 | Enzyme                     | Kinase            |
| Dual specificity tyrosine-phosphorylation-regulated kinase 2 inhibitor                               | Q92630 | 168  | 0.9757 | 0.976 | Enzyme                     | Kinase            |
| Dual specificity tyrosine-phosphorylation-regulated kinase 3 inhibitor                               | O43781 | 65   | 0.9589 | 0.938 | Enzyme                     | Kinase            |
| Dynamin-1 inhibitor                                                                                  | Q05193 | 18   | 0.9999 | 1.000 | Enzyme; Structural protein | NA                |

|                                                                                |        |      |        |       |                         |                                     |
|--------------------------------------------------------------------------------|--------|------|--------|-------|-------------------------|-------------------------------------|
| Dynamin-1-like protein inhibitor                                               | O00429 | 41   | 1.000  | 1.000 | Enzyme                  | Hydrolase                           |
| Dynamin-2 inhibitor                                                            | P50570 | 12   | 1.000  | 1.000 | Enzyme                  | NA                                  |
| E3 ubiquitin-protein ligase Mdm2 inhibitor                                     | Q00987 | 1703 | 0.9961 | 0.996 | Other nuclear protein   | NA                                  |
| E3 ubiquitin-protein ligase SMURF1 inhibitor                                   | Q9HCE7 | 78   | 1.000  | 1.000 | Enzyme                  | Transferase                         |
| E3 ubiquitin-protein ligase SMURF2 inhibitor                                   | Q9HAU4 | 26   | 1.000  | 1.000 | Enzyme                  | Transferase                         |
| E3 ubiquitin-protein ligase TRIM33 inhibitor                                   | Q9UPN9 | 34   | 0.9616 | 0.961 | Epigenetic regulator    | Reader                              |
| E3 ubiquitin-protein ligase XIAP inhibitor                                     | P98170 | 713  | 0.9997 | 1.000 | Other cytosolic protein | NA                                  |
| Early activation antigen CD69 inhibitor                                        | Q07108 | 7    | 0.9992 | 0.999 | Membrane receptor       | NA                                  |
| Ectonucleotide pyrophosphatase/phosphodiesterase family member 1 inhibitor     | P22413 | 129  | 0.9945 | 0.994 | Enzyme                  | NA                                  |
| Ectonucleotide pyrophosphatase/phosphodiesterase family member 2 inhibitor     | Q13822 | 701  | 0.9824 | 0.982 | Enzyme                  | NA                                  |
| Ectonucleotide pyrophosphatase/phosphodiesterase family member 3 inhibitor     | O14638 | 46   | 0.9996 | 1.000 | Enzyme                  | Hydrolase                           |
| EF-hand calcium-binding domain-containing protein 4B inhibitor                 | Q9BSW2 | 56   | 1.000  | 1.000 | Unclassified protein    | NA                                  |
| Egl nine homolog 1 inhibitor                                                   | Q9GZT9 | 447  | 0.999  | 0.999 | Enzyme                  | Oxidoreductase                      |
| eIF-2-alpha kinase GCN2 inhibitor                                              | Q9P2K8 | 27   | 0.9969 | 0.997 | Enzyme                  | Kinase                              |
| ELAV-like protein 1 inhibitor                                                  | Q15717 | 16   | 0.9989 | 0.999 | Unclassified protein    | NA                                  |
| ELAV-like protein 3 inhibitor                                                  | Q14576 | 6    | 0.9999 | 1.000 | Unclassified protein    | NA                                  |
| Elongation of very long chain fatty acids protein 3 inhibitor                  | Q9HB03 | 9    | 0.8776 | 0.879 | Enzyme                  | Transferase                         |
| Elongation of very long chain fatty acids protein 6 inhibitor                  | Q9H5J4 | 98   | 1.000  | 1.000 | Enzyme                  | Transferase                         |
| Elongin-B inhibitor                                                            | Q15370 | 5    | 1.000  | 1.000 | Unclassified protein    | NA                                  |
| Emopamil-binding protein-like inhibitor                                        | Q9BY08 | 4    | 0.9343 | 0.937 | Unclassified protein    | NA                                  |
| Endoplasmic reticulum aminopeptidase 1 inhibitor                               | Q9NZ08 | 61   | 0.9879 | 0.985 | Enzyme                  | Protease                            |
| Endoplasmic reticulum aminopeptidase 2 inhibitor                               | Q6P179 | 81   | 0.9974 | 0.997 | Enzyme                  | Protease                            |
| Endoplasmic reticulum chaperone BiP inhibitor                                  | P11021 | 3    | 0.8946 | 0.898 | Unclassified protein    | NA                                  |
| Endoplasmic reticulum mannosyl-oligosaccharide 1,2-alpha-mannosidase inhibitor | Q9UKM7 | 11   | 1.000  | 1.000 | Enzyme                  | Hydrolase                           |
| Endoplasmin inhibitor                                                          | P14625 | 22   | 0.9325 | 0.937 | Other membrane protein  | NA                                  |
| Endothelial lipase inhibitor                                                   | Q9Y5X9 | 210  | 0.9942 | 0.994 | Enzyme                  | Hydrolase                           |
| Endothelial PAS domain-containing protein 1 inhibitor                          | Q99814 | 277  | 0.9836 | 0.984 | Transcription factor    | NA                                  |
| Endothelin receptor type B antagonist                                          | P24530 | 742  | 0.9984 | 0.999 | Membrane receptor       | Family A G protein-coupled receptor |
| Endothelin-1 receptor antagonist                                               | P25101 | 1149 | 0.9988 | 0.999 | Membrane receptor       | Family A G protein-coupled receptor |
| Endothelin-converting enzyme 1 inhibitor                                       | P42892 | 275  | 0.9939 | 0.994 | Enzyme                  | Protease                            |
| Enteropeptidase inhibitor                                                      | P98073 | 226  | 1.000  | 1.000 | Enzyme                  | Protease                            |

|                                                                         |        |      |        |       |                       |                             |
|-------------------------------------------------------------------------|--------|------|--------|-------|-----------------------|-----------------------------|
| Eosinophil peroxidase inhibitor                                         | P11678 | 3    | 0.997  | 0.953 | Enzyme                | Oxidoreductase              |
| Ephrin type-A receptor 1 antagonist                                     | P21709 | 10   | 0.8316 | 0.842 | Enzyme                | Kinase                      |
| Ephrin type-A receptor 2 agonist                                        | P29317 | 4    | 1.000  | 1.000 | Enzyme                | Kinase                      |
| Ephrin type-A receptor 2 antagonist                                     | P29317 | 405  | 0.9785 | 0.978 | Enzyme                | Kinase                      |
| Ephrin type-A receptor 3 antagonist                                     | P29320 | 21   | 0.8616 | 0.863 | Enzyme                | Kinase                      |
| Ephrin type-A receptor 4 antagonist                                     | P54764 | 36   | 0.9087 | 0.911 | Enzyme                | Kinase                      |
| Ephrin type-B receptor 1 antagonist                                     | P54762 | 7    | 0.8654 | 0.79  | Enzyme                | Kinase                      |
| Ephrin type-B receptor 2 antagonist                                     | P29323 | 37   | 0.9149 | 0.905 | Enzyme                | Kinase                      |
| Ephrin type-B receptor 3 antagonist                                     | P54753 | 27   | 0.921  | 0.918 | Enzyme                | Kinase                      |
| Ephrin type-B receptor 4 antagonist                                     | P54760 | 756  | 0.9877 | 0.987 | Enzyme                | Kinase                      |
| Epidermal growth factor receptor antagonist                             | P00533 | 6496 | 0.9753 | 0.975 | Enzyme                | Kinase                      |
| Epithelial discoidin domain-containing receptor 1 antagonist            | Q08345 | 180  | 0.9732 | 0.973 | Enzyme                | Kinase                      |
| Epoxide hydrolase 1 inhibitor                                           | P07099 | 103  | 0.9952 | 0.995 | Enzyme                | Protease                    |
| Equilibrative nucleoside transporter 1 inhibitor                        | Q99808 | 176  | 0.9985 | 0.999 | Transporter           | Electrochemical transporter |
| Erythropoietin receptor agonist                                         | P19235 | 10   | 1.000  | 1.000 | Membrane receptor     | NA                          |
| Erythropoietin receptor antagonist                                      | P19235 | 8    | 0.9761 | 0.976 | Membrane receptor     | NA                          |
| E-selectin inhibitor                                                    | P16581 | 100  | 0.9993 | 0.999 | Adhesion              | NA                          |
| Estrogen receptor agonist                                               | P03372 | 284  | 0.9979 | 0.998 | Transcription factor  | Nuclear receptor            |
| Estrogen receptor antagonist                                            | P03372 | 1369 | 0.9891 | 0.989 | Transcription factor  | Nuclear receptor            |
| Estrogen receptor beta agonist                                          | Q92731 | 263  | 0.9976 | 0.998 | Transcription factor  | Nuclear receptor            |
| Estrogen receptor beta antagonist                                       | Q92731 | 1321 | 0.9947 | 0.995 | Transcription factor  | Nuclear receptor            |
| Estrogen-related receptor gamma agonist                                 | P62508 | 51   | 0.9999 | 1.000 | Transcription factor  | Nuclear receptor            |
| Estrogen-related receptor gamma antagonist                              | P62508 | 55   | 0.9863 | 0.986 | Transcription factor  | Nuclear receptor            |
| Eukaryotic elongation factor 2 kinase inhibitor                         | O00418 | 39   | 0.9768 | 0.948 | Enzyme                | Kinase                      |
| Eukaryotic initiation factor 4A-I inhibitor                             | P60842 | 29   | 0.9961 | 0.996 | Enzyme                | Hydrolase                   |
| Eukaryotic initiation factor 4A-III inhibitor                           | P38919 | 39   | 1.000  | 1.000 | Enzyme                | Hydrolase                   |
| Eukaryotic translation initiation factor 2-alpha kinase 1 inhibitor     | Q9BQI3 | 34   | 0.992  | 0.992 | Enzyme                | Kinase                      |
| Eukaryotic translation initiation factor 2-alpha kinase 3 inhibitor     | Q9NZJ5 | 109  | 0.999  | 0.999 | Enzyme                | Kinase                      |
| Eukaryotic translation initiation factor 4E inhibitor                   | P06730 | 121  | 1.000  | 1.000 | Other nuclear protein | NA                          |
| Eukaryotic translation initiation factor 4E-binding protein 1 inhibitor | Q13541 | 7    | 0.9999 | 1.000 | Other nuclear protein | NA                          |
| Excitatory amino acid transporter 1 inhibitor                           | P43003 | 65   | 0.9999 | 1.000 | Transporter           | Electrochemical transporter |



|                                                      |        |      |        |       |                             |                                     |
|------------------------------------------------------|--------|------|--------|-------|-----------------------------|-------------------------------------|
| Excitatory amino acid transporter 2 inhibitor        | P43004 | 63   | 0.9997 | 1.000 | Transporter                 | Electrochemical transporter         |
| Excitatory amino acid transporter 3 inhibitor        | P43005 | 64   | 0.9999 | 1.000 | Transporter                 | Electrochemical transporter         |
| Exportin-1 inhibitor                                 | O14980 | 34   | 0.9967 | 0.997 | Unclassified protein        | NA                                  |
| Extracellular calcium-sensing receptor agonist       | P41180 | 60   | 0.9999 | 1.000 | Membrane receptor           | Family C G protein-coupled receptor |
| Extracellular calcium-sensing receptor antagonist    | P41180 | 296  | 0.9999 | 1.000 | Membrane receptor           | Family C G protein-coupled receptor |
| Eyes absent homolog 2 inhibitor                      | O00167 | 5    | 0.9993 | 0.999 | Enzyme                      | NA                                  |
| Eyes absent homolog 3 inhibitor                      | Q99504 | 4    | 1.000  | 1.000 | Enzyme                      | Hydrolase                           |
| Farnesyl pyrophosphate synthase allosteric inhibitor | P14324 | 13   | 0.9927 | 0.993 | Enzyme                      | Transferase                         |
| Farnesyl pyrophosphate synthase inhibitor            | P14324 | 239  | 0.9986 | 0.999 | Enzyme                      | Transferase                         |
| Fascin inhibitor                                     | Q16658 | 41   | 0.9938 | 0.994 | Unclassified protein        | NA                                  |
| Fatty acid synthase inhibitor                        | P49327 | 184  | 0.9845 | 0.984 | Enzyme                      | Transferase                         |
| Fatty acid-binding protein 5 inhibitor               | Q01469 | 8    | 0.9921 | 0.992 | Auxiliary transport protein | Fatty acid binding protein family   |
| Fatty acid-binding protein, adipocyte inhibitor      | P15090 | 62   | 0.9984 | 0.998 | Auxiliary transport protein | Fatty acid binding protein family   |
| Fatty acid-binding protein, heart inhibitor          | P05413 | 22   | 0.9874 | 0.987 | Auxiliary transport protein | Fatty acid binding protein family   |
| Fatty-acid amide hydrolase 1 inhibitor               | O00519 | 1073 | 0.9925 | 0.993 | Enzyme                      | Hydrolase                           |
| Fibroblast growth factor 2 inhibitor                 | P09038 | 5    | 0.8921 | 0.894 | Secreted protein            | NA                                  |
| Fibroblast growth factor receptor 1 agonist          | P11362 | 5    | 1.000  | 1.000 | Enzyme                      | Kinase                              |
| Fibroblast growth factor receptor 1 antagonist       | P11362 | 2215 | 0.9878 | 0.988 | Enzyme                      | Kinase                              |
| Fibroblast growth factor receptor 2 antagonist       | P21802 | 970  | 0.9864 | 0.986 | Enzyme                      | Kinase                              |
| Fibroblast growth factor receptor 3 antagonist       | P22607 | 1294 | 0.9918 | 0.992 | Enzyme                      | Kinase                              |
| Fibroblast growth factor receptor 4 antagonist       | P22455 | 918  | 0.9885 | 0.989 | Enzyme                      | Kinase                              |
| Flap endonuclease 1 inhibitor                        | P39748 | 62   | 1.000  | 1.000 | Enzyme                      | Hydrolase                           |
| fMet-Leu-Phe receptor agonist                        | P21462 | 83   | 0.9996 | 1.000 | Membrane receptor           | Family A G protein-coupled receptor |
| fMet-Leu-Phe receptor antagonist                     | P21462 | 123  | 0.9892 | 0.99  | Membrane receptor           | Family A G protein-coupled receptor |
| Focal adhesion kinase 1 allosteric inhibitor         | Q05397 | 12   | 1.000  | 1.000 | Enzyme                      | Kinase                              |
| Focal adhesion kinase 1 inhibitor                    | Q05397 | 1226 | 0.9869 | 0.986 | Enzyme                      | Kinase                              |
| Folate receptor alpha antagonist                     | P15328 | 43   | 1.000  | 1.000 | Membrane receptor           | NA                                  |
| Folate receptor beta antagonist                      | P14207 | 29   | 0.9999 | 1.000 | Membrane receptor           | NA                                  |

|                                                                  |        |      |        |       |                         |                                            |
|------------------------------------------------------------------|--------|------|--------|-------|-------------------------|--------------------------------------------|
| Follicle-stimulating hormone receptor agonist                    | P23945 | 24   | 0.9958 | 0.996 | Membrane receptor       | Family A G protein-coupled receptor        |
| Follicle-stimulating hormone receptor antagonist                 | P23945 | 20   | 0.9927 | 0.993 | Membrane receptor       | Family A G protein-coupled receptor        |
| Folylpolyglutamate synthase, mitochondrial inhibitor             | Q05932 | 28   | 1.000  | 1.000 | Enzyme                  | Ligase                                     |
| Free fatty acid receptor 1 agonist                               | O14842 | 1226 | 0.9992 | 0.999 | Membrane receptor       | Family A G protein-coupled receptor        |
| Free fatty acid receptor 1 antagonist                            | O14842 | 106  | 0.9972 | 0.995 | Membrane receptor       | Family A G protein-coupled receptor        |
| Free fatty acid receptor 2 agonist                               | O15552 | 78   | 0.9993 | 0.999 | Membrane receptor       | Family A G protein-coupled receptor        |
| Free fatty acid receptor 2 antagonist                            | O15552 | 74   | 0.9969 | 0.997 | Membrane receptor       | Family A G protein-coupled receptor        |
| Free fatty acid receptor 3 agonist                               | O14843 | 42   | 1.000  | 1.000 | Membrane receptor       | Family A G protein-coupled receptor        |
| Free fatty acid receptor 3 antagonist                            | O14843 | 13   | 1.000  | 1.000 | Membrane receptor       | Family A G protein-coupled receptor        |
| Free fatty acid receptor 4 agonist                               | Q5NUL3 | 347  | 0.9994 | 0.999 | Membrane receptor       | Family A G protein-coupled receptor        |
| Frizzled-7 inhibitor                                             | O75084 | 5    | 1.000  | 1.000 | Membrane receptor       | Frizzled family G protein-coupled receptor |
| Fructose-1,6-bisphosphatase 1 inhibitor                          | P09467 | 378  | 0.9992 | 0.999 | Enzyme                  | NA                                         |
| Furin inhibitor                                                  | P09958 | 347  | 0.9999 | 1.000 | Enzyme                  | Protease                                   |
| G protein-activated inward rectifier potassium channel 2 blocker | P48051 | 144  | 1.000  | 1.000 | Ion channel             | Voltage-gated ion channel                  |
| G protein-activated inward rectifier potassium channel 4 blocker | P48544 | 175  | 0.992  | 0.992 | Ion channel             | Voltage-gated ion channel                  |
| G protein-coupled receptor kinase 4 antagonist                   | P32298 | 6    | 0.8103 | 0.804 | Enzyme                  | Kinase                                     |
| G protein-coupled receptor kinase 5 antagonist                   | P34947 | 108  | 0.9743 | 0.975 | Enzyme                  | Kinase                                     |
| G protein-coupled receptor kinase 6 antagonist                   | P43250 | 120  | 0.9719 | 0.96  | Enzyme                  | Kinase                                     |
| G1/S-specific cyclin-D3 inhibitor                                | P30281 | 407  | 0.9924 | 0.992 | Other cytosolic protein | NA                                         |
| G1/S-specific cyclin-E1 inhibitor                                | P24864 | 722  | 0.9835 | 0.983 | Other cytosolic protein | NA                                         |
| G1/S-specific cyclin-E2 inhibitor                                | O96020 | 587  | 0.9947 | 0.994 | Other cytosolic protein | NA                                         |
| Galactokinase inhibitor                                          | P51570 | 74   | 0.9849 | 0.985 | Enzyme                  | Transferase                                |
| Galanin receptor type 1 antagonist                               | P47211 | 13   | 0.9999 | 1.000 | Membrane receptor       | Family A G protein-coupled receptor        |
| Galanin receptor type 2 antagonist                               | O43603 | 19   | 0.9374 | 0.94  | Membrane receptor       | Family A G protein-coupled receptor        |

|                                                              |        |      |        |       |                      |                                     |
|--------------------------------------------------------------|--------|------|--------|-------|----------------------|-------------------------------------|
| Galanin receptor type 3 antagonist                           | O60755 | 145  | 0.846  | 0.836 | Membrane receptor    | Family A G protein-coupled receptor |
| Gamma-aminobutyric acid receptor subunit alpha-1 antagonist  | P14867 | 26   | 0.9355 | 0.937 | Ion channel          | Ligand-gated ion channel            |
| Gamma-aminobutyric acid receptor subunit alpha-2 antagonist  | P47869 | 421  | 0.9972 | 0.997 | Ion channel          | Ligand-gated ion channel            |
| Gamma-aminobutyric acid receptor subunit alpha-3 antagonist  | P34903 | 20   | 0.9235 | 0.925 | Ion channel          | Ligand-gated ion channel            |
| Gamma-aminobutyric acid receptor subunit alpha-4 antagonist  | P48169 | 12   | 0.9964 | 0.997 | Ion channel          | Ligand-gated ion channel            |
| Gamma-aminobutyric acid receptor subunit alpha-5 antagonist  | P31644 | 384  | 0.9938 | 0.994 | Ion channel          | Ligand-gated ion channel            |
| Gamma-aminobutyric acid receptor subunit alpha-6 antagonist  | Q16445 | 61   | 0.9939 | 0.994 | Ion channel          | Ligand-gated ion channel            |
| Gamma-aminobutyric acid receptor subunit beta-2 agonist      | P47870 | 68   | 0.9808 | 0.981 | Ion channel          | Ligand-gated ion channel            |
| Gamma-aminobutyric acid receptor subunit beta-2 antagonist   | P47870 | 308  | 0.9897 | 0.99  | Ion channel          | Ligand-gated ion channel            |
| Gamma-aminobutyric acid receptor subunit gamma-2 antagonist  | P18507 | 584  | 0.9969 | 0.997 | Ion channel          | Ligand-gated ion channel            |
| Gamma-aminobutyric acid receptor subunit rho-1 agonist       | P24046 | 15   | 0.999  | 0.999 | Ion channel          | Ligand-gated ion channel            |
| Gamma-aminobutyric acid receptor subunit rho-1 antagonist    | P24046 | 6    | 1.000  | 1.000 | Ion channel          | Ligand-gated ion channel            |
| Gamma-aminobutyric acid type B receptor subunit 1 agonist    | Q9UBS5 | 5    | 0.9815 | 0.98  | Membrane receptor    | Family C G protein-coupled receptor |
| Gamma-aminobutyric acid type B receptor subunit 1 antagonist | Q9UBS5 | 27   | 0.9956 | 0.996 | Membrane receptor    | Family C G protein-coupled receptor |
| Gamma-butyrobetaine dioxygenase inhibitor                    | O75936 | 29   | 0.9969 | 0.997 | Enzyme               | Oxidoreductase                      |
| Gamma-secretase subunit APH-1B inhibitor                     | Q8WW43 | 1673 | 0.9957 | 0.996 | Enzyme               | NA                                  |
| Gap junction beta-2 protein inhibitor                        | P29033 | 9    | 1.000  | 1.000 | Unclassified protein | NA                                  |
| Gastric inhibitory polypeptide inhibitor                     | P09681 | 7    | 1.000  | 1.000 | Secreted protein     | NA                                  |
| Gastric inhibitory polypeptide receptor agonist              | P48546 | 15   | 0.9999 | 1.000 | Membrane receptor    | Family B G protein-coupled receptor |
| Gastric inhibitory polypeptide receptor antagonist           | P48546 | 92   | 0.9999 | 1.000 | Membrane receptor    | Family B G protein-coupled receptor |
| Gastricsin inhibitor                                         | P20142 | 28   | 0.9998 | 1.000 | Enzyme               | Protease                            |
| Gastrin/cholecystokinin type B receptor agonist              | P32239 | 30   | 0.997  | 0.997 | Membrane receptor    | Family A G protein-coupled receptor |
| Gastrin/cholecystokinin type B receptor antagonist           | P32239 | 765  | 0.9987 | 0.999 | Membrane receptor    | Family A G protein-coupled receptor |

|                                                           |        |      |        |       |                      |                                     |
|-----------------------------------------------------------|--------|------|--------|-------|----------------------|-------------------------------------|
| Gastrin-releasing peptide receptor antagonist             | P30550 | 31   | 0.9992 | 0.999 | Membrane receptor    | Family A G protein-coupled receptor |
| Geranylgeranyl pyrophosphate synthase inhibitor           | O95749 | 65   | 0.9873 | 0.987 | Enzyme               | Transferase                         |
| Geranylgeranyl transferase type-1 subunit beta inhibitor  | P53609 | 411  | 0.9957 | 0.996 | Enzyme               | Transferase                         |
| Geranylgeranyl transferase type-2 subunit alpha inhibitor | Q92696 | 8    | 1.000  | 1.000 | Enzyme               | Transferase                         |
| Ghrelin O-acyltransferase inhibitor                       | Q96T53 | 4    | 0.8276 | 0.829 | Enzyme               | Transferase                         |
| Glucagon inhibitor                                        | P01275 | 82   | 1.000  | 1.000 | Secreted protein     | NA                                  |
| Glucagon receptor agonist                                 | P47871 | 49   | 0.9999 | 1.000 | Membrane receptor    | Family B G protein-coupled receptor |
| Glucagon receptor antagonist                              | P47871 | 907  | 0.9957 | 0.996 | Membrane receptor    | Family B G protein-coupled receptor |
| Glucagon-like peptide 1 receptor agonist                  | P43220 | 451  | 0.9995 | 1.000 | Membrane receptor    | Family B G protein-coupled receptor |
| Glucagon-like peptide 1 receptor antagonist               | P43220 | 64   | 0.9742 | 0.975 | Membrane receptor    | Family B G protein-coupled receptor |
| Glucagon-like peptide 2 receptor agonist                  | O95838 | 37   | 1.000  | 1.000 | Membrane receptor    | Family B G protein-coupled receptor |
| Glucocorticoid receptor agonist                           | P04150 | 433  | 0.9995 | 1.000 | Transcription factor | Nuclear receptor                    |
| Glucocorticoid receptor antagonist                        | P04150 | 1679 | 0.9971 | 0.997 | Transcription factor | Nuclear receptor                    |
| Glucokinase regulatory protein inhibitor                  | Q14397 | 103  | 1.000  | 1.000 | Enzyme               | NA                                  |
| Glucose-6-phosphatase catalytic subunit 1 inhibitor       | P35575 | 13   | 1.000  | 1.000 | Enzyme               | Phosphatase                         |
| Glucose-6-phosphatase inhibitor                           | P35575 | 13   | 1.000  | 1.000 | Enzyme               | Phosphatase                         |
| Glucose-6-phosphate 1-dehydrogenase inhibitor             | P11413 | 20   | 1.000  | 1.000 | Enzyme               | Oxidoreductase                      |
| Glucose-6-phosphate exchanger SLC37A4 inhibitor           | O43826 | 11   | 0.9999 | 1.000 | Transporter          | Electrochemical transporter         |
| Glucose-dependent insulintropic receptor agonist          | Q8TDV5 | 1044 | 0.9974 | 0.997 | Membrane receptor    | Family A G protein-coupled receptor |
| Glucose-dependent insulintropic receptor antagonist       | Q8TDV5 | 76   | 0.9983 | 0.998 | Membrane receptor    | Family A G protein-coupled receptor |
| Glutamate carboxypeptidase 2 inhibitor                    | Q04609 | 229  | 0.9996 | 1.000 | Enzyme               | Protease                            |
| Glutamate receptor 1 agonist                              | P42261 | 10   | 0.981  | 0.981 | Ion channel          | Ligand-gated ion channel            |
| Glutamate receptor 1 antagonist                           | P42261 | 65   | 0.9612 | 0.962 | Ion channel          | Ligand-gated ion channel            |
| Glutamate receptor 2 agonist                              | P42262 | 8    | 0.9611 | 0.963 | Ion channel          | Ligand-gated ion channel            |
| Glutamate receptor 2 antagonist                           | P42262 | 29   | 0.9986 | 0.999 | Ion channel          | Ligand-gated ion channel            |
| Glutamate receptor 3 antagonist                           | P42263 | 10   | 0.9485 | 0.949 | Ion channel          | Ligand-gated ion                    |

|                                                        |        |     |        |       |             |                          |
|--------------------------------------------------------|--------|-----|--------|-------|-------------|--------------------------|
|                                                        |        |     |        |       |             | channel                  |
| Glutamate receptor 4 antagonist                        | P48058 | 67  | 0.9712 | 0.971 | Ion channel | Ligand-gated ion channel |
| Glutamate receptor ionotropic, kainate 1 agonist       | P39086 | 3   | 0.9992 | 0.999 | Ion channel | Ligand-gated ion channel |
| Glutamate receptor ionotropic, kainate 1 antagonist    | P39086 | 121 | 0.9997 | 1.000 | Ion channel | Ligand-gated ion channel |
| Glutamate receptor ionotropic, kainate 2 antagonist    | Q13002 | 70  | 0.9999 | 1.000 | Ion channel | Ligand-gated ion channel |
| Glutamate receptor ionotropic, kainate 3 antagonist    | Q13003 | 30  | 0.9967 | 0.997 | Ion channel | Ligand-gated ion channel |
| Glutamate receptor ionotropic, kainate 5 antagonist    | Q16478 | 6   | 0.9966 | 0.997 | Ion channel | Ligand-gated ion channel |
| Glutamate receptor ionotropic, NMDA 1 antagonist       | Q05586 | 72  | 1.000  | 1.000 | Ion channel | Ligand-gated ion channel |
| Glutamate receptor ionotropic, NMDA 2A antagonist      | Q12879 | 66  | 0.9814 | 0.982 | Ion channel | Ligand-gated ion channel |
| Glutamate receptor ionotropic, NMDA 2B antagonist      | Q13224 | 276 | 0.9953 | 0.992 | Ion channel | Ligand-gated ion channel |
| Glutamate receptor ionotropic, NMDA 2C antagonist      | Q14957 | 254 | 0.9928 | 0.993 | Ion channel | Ligand-gated ion channel |
| Glutamate--cysteine ligase catalytic subunit inhibitor | P48506 | 3   | 1.000  | 1.000 | Enzyme      | Ligase                   |
| Glutaminase kidney isoform, mitochondrial inhibitor    | O94925 | 671 | 0.9979 | 0.998 | Enzyme      | Hydrolase                |
| Glutaminase liver isoform, mitochondrial inhibitor     | Q9UI32 | 16  | 0.9999 | 1.000 | Enzyme      | Hydrolase                |
| Glutamine--tRNA ligase inhibitor                       | P47897 | 3   | 0.9998 | 1.000 | Enzyme      | Ligase                   |
| GlutaminyI-peptide cyclotransferase inhibitor          | Q16769 | 401 | 0.9991 | 0.999 | Enzyme      | Aminoacyltransferase     |
| Glutamyl aminopeptidase inhibitor                      | Q07075 | 35  | 0.9999 | 1.000 | Enzyme      | Protease                 |
| Glutathione hydrolase 1 proenzyme inhibitor            | P19440 | 5   | 1.000  | 1.000 | Enzyme      | NA                       |
| Glutathione reductase, mitochondrial inhibitor         | P00390 | 33  | 0.9675 | 0.968 | Enzyme      | Oxidoreductase           |
| Glutathione S-transferase A1 inhibitor                 | P08263 | 17  | 0.9997 | 1.000 | Enzyme      | NA                       |
| Glutathione S-transferase A2 inhibitor                 | P09210 | 3   | 0.9735 | 0.974 | Enzyme      | Transferase              |
| Glutathione S-transferase Mu 1 inhibitor               | P09488 | 3   | 0.9748 | 0.975 | Enzyme      | Transferase              |
| Glutathione S-transferase Mu 2 inhibitor               | P28161 | 36  | 1.000  | 1.000 | Enzyme      | Transferase              |
| Glutathione S-transferase omega-1 inhibitor            | P78417 | 70  | 0.9846 | 0.985 | Enzyme      | NA                       |
| Glutathione S-transferase P inhibitor                  | P09211 | 84  | 0.9903 | 0.99  | Enzyme      | Transferase              |
| Glyceraldehyde-3-phosphate dehydrogenase inhibitor     | P04406 | 69  | 0.9092 | 0.908 | Enzyme      | Oxidoreductase           |
| Glycine receptor subunit alpha-1 antagonist            | P23415 | 25  | 0.9887 | 0.989 | Ion channel | Ligand-gated ion channel |

|                                                      |        |      |        |       |                   |                                     |
|------------------------------------------------------|--------|------|--------|-------|-------------------|-------------------------------------|
| Glycogen [starch] synthase, muscle inhibitor         | P13807 | 4    | 1.000  | 1.000 | Enzyme            | NA                                  |
| Glycogen debranching enzyme inhibitor                | P35573 | 5    | 1.000  | 1.000 | Enzyme            | NA                                  |
| Glycogen phosphorylase, brain form inhibitor         | P11216 | 4    | 0.8135 | 0.815 | Enzyme            | NA                                  |
| Glycogen phosphorylase, liver form inhibitor         | P06737 | 441  | 0.998  | 0.998 | Enzyme            | NA                                  |
| Glycogen phosphorylase, muscle form inhibitor        | P11217 | 97   | 0.9966 | 0.997 | Enzyme            | NA                                  |
| Glycogen synthase kinase-3 alpha inhibitor           | P49840 | 350  | 0.9733 | 0.973 | Enzyme            | Kinase                              |
| Glycogen synthase kinase-3 beta allosteric inhibitor | P49841 | 17   | 1.000  | 1.000 | Enzyme            | Kinase                              |
| Glycogen synthase kinase-3 beta inhibitor            | P49841 | 2817 | 0.9802 | 0.98  | Enzyme            | Kinase                              |
| Glycylpeptide N-tetradecanoyltransferase 1 inhibitor | P30419 | 370  | 0.9987 | 0.999 | Enzyme            | Transferase                         |
| Glycylpeptide N-tetradecanoyltransferase 2 inhibitor | O60551 | 10   | 0.9852 | 0.985 | Enzyme            | Transferase                         |
| Gonadotropin-releasing hormone receptor agonist      | P30968 | 37   | 0.9574 | 0.958 | Membrane receptor | Family A G protein-coupled receptor |
| Gonadotropin-releasing hormone receptor antagonist   | P30968 | 1169 | 0.9989 | 0.999 | Membrane receptor | Family A G protein-coupled receptor |
| G-protein coupled bile acid receptor 1 agonist       | Q8TDU6 | 523  | 0.9986 | 0.999 | Membrane receptor | Family A G protein-coupled receptor |
| G-protein coupled estrogen receptor 1 agonist        | Q99527 | 5    | 0.8729 | 0.875 | Membrane receptor | Family A G protein-coupled receptor |
| G-protein coupled estrogen receptor 1 antagonist     | Q99527 | 3    | 0.9465 | 0.948 | Membrane receptor | Family A G protein-coupled receptor |
| G-protein coupled receptor 183 antagonist            | P32249 | 22   | 0.9996 | 1.000 | Membrane receptor | Family A G protein-coupled receptor |
| G-protein coupled receptor 35 agonist                | Q9HC97 | 194  | 0.9962 | 0.996 | Membrane receptor | Family A G protein-coupled receptor |
| G-protein coupled receptor 35 antagonist             | Q9HC97 | 53   | 0.9857 | 0.986 | Membrane receptor | Family A G protein-coupled receptor |
| G-protein coupled receptor 39 agonist                | O43194 | 65   | 0.9653 | 0.967 | Membrane receptor | Family A G protein-coupled receptor |
| G-protein coupled receptor 4 antagonist              | P46093 | 71   | 1.000  | 1.000 | Membrane receptor | Family A G protein-coupled receptor |
| G-protein coupled receptor 52 agonist                | Q9Y2T5 | 45   | 1.000  | 1.000 | Membrane receptor | Family A G protein-coupled receptor |
| G-protein coupled receptor 55 agonist                | Q9Y2T6 | 82   | 0.9905 | 0.991 | Membrane receptor | Family A G protein-coupled receptor |
| G-protein coupled receptor 55 antagonist             | Q9Y2T6 | 66   | 0.9991 | 0.999 | Membrane receptor | Family A G protein-coupled receptor |
| G-protein coupled receptor 6 agonist                 | P46095 | 32   | 1.000  | 1.000 | Membrane receptor | Family A G protein-coupled receptor |
| G-protein coupled receptor 6 antagonist              | P46095 | 600  | 1.000  | 1.000 | Membrane receptor | Family A G protein-coupled receptor |

|                                                                            |        |      |        |       |                         |                                     |
|----------------------------------------------------------------------------|--------|------|--------|-------|-------------------------|-------------------------------------|
| G-protein coupled receptor 84 agonist                                      | Q9NQ55 | 66   | 0.9998 | 1.000 | Membrane receptor       | Family A G protein-coupled receptor |
| G-protein coupled receptor 84 antagonist                                   | Q9NQ55 | 328  | 0.9999 | 1.000 | Membrane receptor       | Family A G protein-coupled receptor |
| Granzyme B inhibitor                                                       | P10144 | 22   | 0.9974 | 0.997 | Enzyme                  | Protease                            |
| Group 10 secretory phospholipase A2 inhibitor                              | O15496 | 93   | 0.9931 | 0.993 | Enzyme                  | Hydrolase                           |
| Group IID secretory phospholipase A2 inhibitor                             | Q9UNK4 | 15   | 0.9987 | 0.999 | Enzyme                  | Hydrolase                           |
| Group IIE secretory phospholipase A2 inhibitor                             | Q9NZK7 | 14   | 1.000  | 1.000 | Enzyme                  | Hydrolase                           |
| Group IIF secretory phospholipase A2 inhibitor                             | Q9BZM2 | 9    | 1.000  | 1.000 | Enzyme                  | Hydrolase                           |
| Growth factor receptor-bound protein 2 antagonist                          | P62993 | 155  | 0.9975 | 0.998 | Other cytosolic protein | NA                                  |
| Growth hormone secretagogue receptor type 1 agonist                        | Q92847 | 674  | 0.9978 | 0.997 | Membrane receptor       | Family A G protein-coupled receptor |
| Growth hormone secretagogue receptor type 1 antagonist                     | Q92847 | 561  | 0.9931 | 0.993 | Membrane receptor       | Family A G protein-coupled receptor |
| Growth/differentiation factor 8 inhibitor                                  | O14793 | 7    | 0.9991 | 0.999 | Secreted protein        | NA                                  |
| GTPase HRas inhibitor                                                      | P01112 | 29   | 0.9681 | 0.968 | Other cytosolic protein | NA                                  |
| GTPase KRas inhibitor                                                      | P01116 | 162  | 0.9934 | 0.994 | Enzyme                  | Hydrolase                           |
| Guanine deaminase inhibitor                                                | Q9Y2T3 | 12   | 1.000  | 1.000 | Enzyme                  | Hydrolase                           |
| Guanine nucleotide-binding protein G(i) subunit alpha inhibitor            | P08754 | 6    | 0.9999 | 1.000 | Other membrane protein  | NA                                  |
| Guanine nucleotide-binding protein G(i) subunit alpha-1 inhibitor          | P63096 | 6    | 0.9999 | 1.000 | Other membrane protein  | NA                                  |
| Guanine nucleotide-binding protein G(I)/G(S)/G(T) subunit beta-1 inhibitor | P62873 | 19   | 0.9889 | 0.978 | Unclassified protein    | NA                                  |
| Guanine nucleotide-binding protein G(o) subunit alpha inhibitor            | P09471 | 7    | 1.000  | 1.000 | Other membrane protein  | NA                                  |
| Guanine nucleotide-binding protein subunit alpha-11 inhibitor              | P29992 | 6    | 1.000  | 1.000 | Unclassified protein    | NA                                  |
| Guanylate cyclase soluble subunit beta-2 inhibitor                         | O75343 | 295  | 0.9996 | 1.000 | Enzyme                  | Lyase                               |
| Heat shock factor protein 1 inhibitor                                      | Q00613 | 34   | 0.9455 | 0.946 | Other cytosolic protein | NA                                  |
| Heat shock protein 75 kDa, mitochondrial inhibitor                         | Q12931 | 21   | 0.9514 | 0.954 | Other cytosolic protein | NA                                  |
| Heat shock protein beta-1 inhibitor                                        | P04792 | 10   | 0.8762 | 0.876 | Other cytosolic protein | NA                                  |
| Heat shock protein HSP 90-alpha inhibitor                                  | P07900 | 1169 | 0.993  | 0.993 | Other cytosolic protein | NA                                  |
| Heat shock protein HSP 90-beta inhibitor                                   | P08238 | 359  | 0.994  | 0.993 | Other cytosolic protein | NA                                  |
| Heat shock-related 70 kDa protein 2 inhibitor                              | P54652 | 9    | 0.9294 | 0.93  | Other cytosolic protein | NA                                  |
| Hematopoietic prostaglandin D synthase inhibitor                           | O60760 | 248  | 0.9898 | 0.99  | Enzyme                  | Transferase                         |
| Heme oxygenase 1 inhibitor                                                 | P09601 | 6    | 0.9991 | 0.999 | Enzyme                  | Oxidoreductase                      |
| Heparanase inhibitor                                                       | Q9Y251 | 209  | 0.9941 | 0.994 | Enzyme                  | Hydrolase                           |
| Hepatic triacylglycerol lipase inhibitor                                   | P11150 | 60   | 0.9759 | 0.977 | Enzyme                  | NA                                  |

|                                                                                              |        |      |        |       |                      |                                     |
|----------------------------------------------------------------------------------------------|--------|------|--------|-------|----------------------|-------------------------------------|
| Hepatocyte growth factor activator inhibitor                                                 | Q04756 | 112  | 0.9986 | 0.999 | Enzyme               | Protease                            |
| Hepatocyte growth factor inhibitor                                                           | P14210 | 4    | 1.000  | 1.000 | Unclassified protein | NA                                  |
| Hepatocyte growth factor receptor antagonist                                                 | P08581 | 3153 | 0.9868 | 0.987 | Enzyme               | Kinase                              |
| Hepatocyte growth factor-like protein inhibitor                                              | P26927 | 3    | 1.000  | 1.000 | Secreted protein     | NA                                  |
| Hepatocyte nuclear factor 4-alpha inhibitor                                                  | P41235 | 20   | 0.9999 | 1.000 | Unclassified protein | NA                                  |
| Hexokinase HKDC1 inhibitor                                                                   | Q2TB90 | 99   | 0.9336 | 0.932 | Enzyme               | Transferase                         |
| Hexokinase-1 inhibitor                                                                       | P19367 | 20   | 0.9858 | 0.986 | Enzyme               | NA                                  |
| Hexokinase-2 inhibitor                                                                       | P52789 | 25   | 0.9881 | 0.988 | Enzyme               | NA                                  |
| Hexokinase-4 activator                                                                       | P35557 | 28   | 1.000  | 1.000 | Enzyme               | NA                                  |
| Hexokinase-4 inhibitor                                                                       | P35557 | 88   | 0.9791 | 0.979 | Enzyme               | NA                                  |
| High affinity cAMP-specific 3',5'-cyclic phosphodiesterase 7A inhibitor                      | Q13946 | 540  | 0.9865 | 0.986 | Enzyme               | Phosphodiesterase                   |
| High affinity cAMP-specific and IBMX-insensitive 3',5'-cyclic phosphodiesterase 8A inhibitor | O60658 | 14   | 0.8353 | 0.839 | Enzyme               | Phosphodiesterase                   |
| High affinity cAMP-specific and IBMX-insensitive 3',5'-cyclic phosphodiesterase 8B inhibitor | O95263 | 121  | 0.997  | 0.997 | Enzyme               | Phosphodiesterase                   |
| High affinity cGMP-specific 3',5'-cyclic phosphodiesterase 9A inhibitor                      | O76083 | 395  | 0.9905 | 0.991 | Enzyme               | Phosphodiesterase                   |
| High affinity choline transporter 1 inhibitor                                                | Q9GZV3 | 24   | 1.000  | 1.000 | Transporter          | Electrochemical transporter         |
| High affinity nerve growth factor receptor agonist                                           | P04629 | 702  | 0.9995 | 1.000 | Enzyme               | Kinase                              |
| High affinity nerve growth factor receptor antagonist                                        | P04629 | 1184 | 0.9716 | 0.971 | Enzyme               | Kinase                              |
| Histamine H1 receptor agonist                                                                | P35367 | 17   | 0.9711 | 0.97  | Membrane receptor    | Family A G protein-coupled receptor |
| Histamine H1 receptor antagonist                                                             | P35367 | 807  | 0.9838 | 0.984 | Membrane receptor    | Family A G protein-coupled receptor |
| Histamine H2 receptor agonist                                                                | P25021 | 89   | 0.9999 | 1.000 | Membrane receptor    | Family A G protein-coupled receptor |
| Histamine H2 receptor antagonist                                                             | P25021 | 136  | 0.9615 | 0.962 | Membrane receptor    | Family A G protein-coupled receptor |
| Histamine H3 receptor agonist                                                                | Q9Y5N1 | 388  | 0.9955 | 0.995 | Membrane receptor    | Family A G protein-coupled receptor |
| Histamine H3 receptor antagonist                                                             | Q9Y5N1 | 2048 | 0.9926 | 0.993 | Membrane receptor    | Family A G protein-coupled receptor |
| Histamine H4 receptor agonist                                                                | Q9H3N8 | 245  | 0.9973 | 0.997 | Membrane receptor    | Family A G protein-coupled receptor |
| Histamine H4 receptor antagonist                                                             | Q9H3N8 | 265  | 0.9867 | 0.987 | Membrane receptor    | Family A G protein-coupled receptor |
| Histamine N-methyltransferase inhibitor                                                      | P50135 | 4    | 0.8908 | 0.895 | Enzyme               | Transferase                         |
| Histone acetyltransferase KAT2A inhibitor                                                    | Q92830 | 11   | 0.8398 | 0.841 | Epigenetic regulator | Reader; Writer                      |



|                                                                     |        |      |        |       |                       |                |
|---------------------------------------------------------------------|--------|------|--------|-------|-----------------------|----------------|
| Histone acetyltransferase KAT2B inhibitor                           | Q92831 | 86   | 0.9958 | 0.974 | Epigenetic regulator  | Reader; Writer |
| Histone acetyltransferase KAT6A inhibitor                           | Q92794 | 222  | 1.000  | 1.000 | Enzyme                | NA             |
| Histone acetyltransferase KAT8 inhibitor                            | Q9H7Z6 | 5    | 0.9999 | 1.000 | Epigenetic regulator  | Reader; Writer |
| Histone acetyltransferase p300 inhibitor                            | Q09472 | 247  | 0.9762 | 0.977 | Epigenetic regulator  | Reader; Writer |
| Histone chaperone ASF1A inhibitor                                   | Q9Y294 | 3    | 0.9987 | 0.999 | Other nuclear protein | NA             |
| Histone deacetylase 1 inhibitor                                     | Q13547 | 3501 | 0.9952 | 0.995 | Epigenetic regulator  | Eraser         |
| Histone deacetylase 11 inhibitor                                    | Q96DB2 | 230  | 0.9974 | 0.997 | Epigenetic regulator  | Eraser         |
| Histone deacetylase 2 inhibitor                                     | Q92769 | 1311 | 0.9948 | 0.995 | Epigenetic regulator  | Eraser         |
| Histone deacetylase 3 inhibitor                                     | O15379 | 938  | 0.9955 | 0.996 | Epigenetic regulator  | Eraser         |
| Histone deacetylase 4 inhibitor                                     | P56524 | 526  | 0.9949 | 0.995 | Epigenetic regulator  | Eraser         |
| Histone deacetylase 5 inhibitor                                     | Q9UQL6 | 1758 | 0.9936 | 0.994 | Epigenetic regulator  | Eraser         |
| Histone deacetylase 6 inhibitor                                     | Q9UBN7 | 2202 | 0.9958 | 0.996 | Epigenetic regulator  | Eraser         |
| Histone deacetylase 7 inhibitor                                     | Q8WUI4 | 144  | 0.9885 | 0.988 | Epigenetic regulator  | Eraser         |
| Histone deacetylase 8 inhibitor                                     | Q9BY41 | 1294 | 0.9944 | 0.994 | Epigenetic regulator  | Eraser         |
| Histone deacetylase 9 inhibitor                                     | Q9UKV0 | 120  | 0.9747 | 0.975 | Epigenetic regulator  | Eraser         |
| Histone H1.0 inhibitor                                              | P07305 | 7    | 0.9812 | 0.983 | Other nuclear protein | NA             |
| Histone lysine demethylase PHF8 inhibitor                           | Q9UPP1 | 63   | 0.9931 | 0.993 | Epigenetic regulator  | Eraser; Reader |
| Histone-arginine methyltransferase CARM1 inhibitor                  | Q86X55 | 154  | 0.9876 | 0.988 | Epigenetic regulator  | Writer         |
| Histone-lysine N-methyltransferase 2A inhibitor                     | Q03164 | 7    | 0.8102 | 0.814 | Epigenetic regulator  | Reader; Writer |
| Histone-lysine N-methyltransferase EHMT1 inhibitor                  | Q9H9B1 | 120  | 0.9973 | 0.996 | Epigenetic regulator  | Writer         |
| Histone-lysine N-methyltransferase EHMT2 inhibitor                  | Q96KQ7 | 258  | 0.9969 | 0.996 | Epigenetic regulator  | Writer         |
| Histone-lysine N-methyltransferase EZH1 inhibitor                   | Q92800 | 29   | 0.9773 | 0.91  | Epigenetic regulator  | Writer         |
| Histone-lysine N-methyltransferase EZH2 inhibitor                   | Q15910 | 414  | 0.9994 | 0.999 | Epigenetic regulator  | Writer         |
| Histone-lysine N-methyltransferase NSD2 inhibitor                   | O96028 | 3    | 0.9878 | 0.988 | Epigenetic regulator  | Writer         |
| Histone-lysine N-methyltransferase SETD7 inhibitor                  | Q8WTS6 | 12   | 0.9531 | 0.822 | Epigenetic regulator  | Writer         |
| Histone-lysine N-methyltransferase SMYD3 inhibitor                  | Q9H7B4 | 84   | 1.000  | 1.000 | Epigenetic regulator  | Writer         |
| Histone-lysine N-methyltransferase SUV39H1 inhibitor                | O43463 | 7    | 0.8718 | 0.604 | Epigenetic regulator  | Reader; Writer |
| Histone-lysine N-methyltransferase SUV39H2 inhibitor                | Q9H5I1 | 437  | 1.000  | 1.000 | Epigenetic regulator  | Reader; Writer |
| Histone-lysine N-methyltransferase, H3 lysine-79 specific inhibitor | Q8TEK3 | 101  | 0.9956 | 0.996 | Epigenetic regulator  | Writer         |
| HLA class I histocompatibility antigen, A alpha chain inhibitor     | P04439 | 149  | 0.9997 | 1.000 | Surface antigen       | NA             |
| HLA class II histocompatibility antigen gamma chain inhibitor       | P04233 | 37   | 0.9869 | 0.988 | Surface antigen       | NA             |
| HLA class II histocompatibility antigen, DR beta 3 chain inhibitor  | P79483 | 16   | 0.9999 | 1.000 | Surface antigen       | NA             |

|                                                                       |        |      |        |       |                         |                                     |
|-----------------------------------------------------------------------|--------|------|--------|-------|-------------------------|-------------------------------------|
| HLA class II histocompatibility antigen, DRB1 beta chain inhibitor    | P01911 | 3    | 1.000  | 1.000 | Surface antigen         | NA                                  |
| HLA class II histocompatibility antigen, DRB1-1 beta chain inhibitor  | P04229 | 38   | 1.000  | 1.000 | Surface antigen         | NA                                  |
| Homeodomain-interacting protein kinase 1 inhibitor                    | Q86Z02 | 14   | 0.882  | 0.885 | Enzyme                  | Kinase                              |
| Homeodomain-interacting protein kinase 2 inhibitor                    | Q9H2X6 | 19   | 0.8681 | 0.866 | Enzyme                  | Kinase                              |
| Hormone-sensitive lipase inhibitor                                    | Q05469 | 251  | 1.000  | 1.000 | Enzyme                  | Hydrolase                           |
| Huntingtin inhibitor                                                  | P42858 | 15   | 0.9677 | 0.968 | Unclassified protein    | NA                                  |
| Hydroxycarboxylic acid receptor 1 agonist                             | Q9BXC0 | 302  | 0.9999 | 1.000 | Membrane receptor       | Family A G protein-coupled receptor |
| Hydroxycarboxylic acid receptor 2 agonist                             | Q8TDS4 | 425  | 0.9968 | 0.996 | Membrane receptor       | Family A G protein-coupled receptor |
| Hydroxycarboxylic acid receptor 2 antagonist                          | Q8TDS4 | 30   | 0.9886 | 0.989 | Membrane receptor       | Family A G protein-coupled receptor |
| Hydroxycarboxylic acid receptor 3 agonist                             | P49019 | 103  | 0.9997 | 1.000 | Membrane receptor       | Family A G protein-coupled receptor |
| Hydroxycarboxylic acid receptor 3 antagonist                          | P49019 | 15   | 1.000  | 1.000 | Membrane receptor       | Family A G protein-coupled receptor |
| Hypoxanthine-guanine phosphoribosyltransferase inhibitor              | P00492 | 104  | 0.9996 | 1.000 | Enzyme                  | Transferase                         |
| Hypoxia-inducible factor 1-alpha inhibitor                            | Q16665 | 197  | 0.9735 | 0.974 | Transcription factor    | NA                                  |
| IgG receptor FcRn large subunit p51 antagonist                        | P55899 | 70   | 1.000  | 1.000 | Unclassified protein    | NA                                  |
| Ileal sodium/bile acid cotransporter inhibitor                        | Q12908 | 253  | 0.9997 | 1.000 | Transporter             | Electrochemical transporter         |
| Indoleamine 2,3-dioxygenase 1 inhibitor                               | P14902 | 1456 | 0.9935 | 0.993 | Enzyme                  | Oxidoreductase                      |
| Indoleamine 2,3-dioxygenase 2 inhibitor                               | Q6ZQW0 | 20   | 0.9998 | 1.000 | Enzyme                  | Oxidoreductase                      |
| Indolethylamine N-methyltransferase inhibitor                         | O95050 | 15   | 0.9994 | 1.000 | Enzyme                  | Transferase                         |
| Induced myeloid leukemia cell differentiation protein Mcl-1 inhibitor | Q07820 | 582  | 0.9896 | 0.989 | Other cytosolic protein | NA                                  |
| Inhibitor of nuclear factor kappa-B kinase subunit alpha inhibitor    | O15111 | 340  | 0.9894 | 0.989 | Enzyme                  | Kinase                              |
| Inhibitor of nuclear factor kappa-B kinase subunit beta inhibitor     | O14920 | 894  | 0.986  | 0.985 | Enzyme                  | Kinase                              |
| Inhibitor of nuclear factor kappa-B kinase subunit epsilon inhibitor  | Q14164 | 414  | 0.9942 | 0.994 | Enzyme                  | Kinase                              |
| Inosine-5'-monophosphate dehydrogenase 1 inhibitor                    | P20839 | 140  | 0.9995 | 1.000 | Enzyme                  | Oxidoreductase                      |
| Inosine-5'-monophosphate dehydrogenase 2 inhibitor                    | P12268 | 619  | 0.9987 | 0.999 | Enzyme                  | Oxidoreductase                      |
| Inositol 1,4,5-trisphosphate receptor type 1 antagonist               | Q14643 | 4    | 1.000  | 1.000 | Ion channel             | Ligand-gated ion channel            |
| Inositol 1,4,5-trisphosphate receptor type 3 antagonist               | Q14573 | 3    | 1.000  | 1.000 | Ion channel             | Ligand-gated ion channel            |
| Inositol hexakisphosphate kinase 1 inhibitor                          | Q92551 | 14   | 1.000  | 1.000 | Enzyme                  | Transferase                         |
| Inositol hexakisphosphate kinase 2 inhibitor                          | Q9UHH9 | 11   | 0.9683 | 0.97  | Enzyme                  | Transferase                         |

|                                                                                |        |      |        |       |                             |                   |
|--------------------------------------------------------------------------------|--------|------|--------|-------|-----------------------------|-------------------|
| Inositol polyphosphate multikinase inhibitor                                   | Q8NFU5 | 6    | 1.000  | 1.000 | Enzyme                      | Transferase       |
| Inositol polyphosphate-5-phosphatase A inhibitor                               | Q14642 | 3    | 0.9963 | 0.997 | Enzyme                      | Phosphatase       |
| Inositol-trisphosphate 3-kinase B inhibitor                                    | P27987 | 38   | 1.000  | 1.000 | Enzyme                      | NA                |
| Insulin receptor antagonist                                                    | P06213 | 857  | 0.9791 | 0.979 | Enzyme                      | Kinase            |
| Insulin receptor-related protein inhibitor                                     | P14616 | 11   | 0.8118 | 0.817 | Enzyme                      | Kinase            |
| Insulin-degrading enzyme inhibitor                                             | P14735 | 88   | 0.8975 | 0.895 | Enzyme                      | NA                |
| Insulin-like growth factor 1 receptor agonist                                  | P08069 | 5    | 1.000  | 1.000 | Enzyme                      | Kinase            |
| Insulin-like growth factor 1 receptor antagonist                               | P08069 | 2013 | 0.9854 | 0.985 | Enzyme                      | Kinase            |
| Insulin-like growth factor-binding protein 3 inhibitor                         | P17936 | 39   | 1.000  | 1.000 | Secreted protein            | NA                |
| Insulin-like growth factor-binding protein 5 inhibitor                         | P24593 | 9    | 1.000  | 1.000 | Secreted protein            | NA                |
| Integrin alpha-3 inhibitor                                                     | P26006 | 7    | 1.000  | 1.000 | Membrane receptor           | NA                |
| Integrin alpha-4 inhibitor                                                     | P13612 | 1180 | 0.9982 | 0.998 | Membrane receptor           | NA                |
| Integrin alpha-5 inhibitor                                                     | P08648 | 10   | 1.000  | 1.000 | Membrane receptor           | NA                |
| Integrin alpha-IIb inhibitor                                                   | P08514 | 1279 | 0.9973 | 0.997 | Membrane receptor           | NA                |
| Integrin alpha-L inhibitor                                                     | P20701 | 79   | 0.9985 | 0.999 | Adhesion; Membrane receptor | NA                |
| Integrin alpha-V inhibitor                                                     | P06756 | 1129 | 0.9967 | 0.997 | Membrane receptor           | NA                |
| Integrin beta-1 inhibitor                                                      | P05556 | 336  | 0.9932 | 0.993 | Membrane receptor           | NA                |
| Integrin beta-2 inhibitor                                                      | P05107 | 345  | 0.9996 | 1.000 | Membrane receptor           | NA                |
| Integrin-linked protein kinase inhibitor                                       | Q13418 | 160  | 0.9976 | 0.998 | Enzyme                      | Kinase            |
| Intercellular adhesion molecule 1 inhibitor                                    | P05362 | 125  | 0.9883 | 0.988 | Adhesion                    | NA                |
| Interferon-induced, double-stranded RNA-activated protein kinase inhibitor     | P19525 | 60   | 0.9599 | 0.958 | Enzyme                      | Kinase            |
| Interleukin-1 receptor antagonist protein antagonist                           | P18510 | 11   | 0.9723 | 0.953 | Unclassified protein        | NA                |
| Interleukin-1 receptor-associated kinase 1 antagonist                          | P51617 | 46   | 0.8924 | 0.891 | Enzyme                      | Kinase            |
| Interleukin-1 receptor-associated kinase 3 inhibitor                           | Q9Y616 | 3    | 0.8373 | 0.84  | Enzyme                      | Kinase            |
| Interleukin-1 receptor-associated kinase 4 antagonist                          | Q9NWZ3 | 1199 | 0.9936 | 0.994 | Enzyme                      | Kinase            |
| Interleukin-15 receptor subunit alpha antagonist                               | Q13261 | 20   | 1.000  | 1.000 | Membrane receptor           | NA                |
| Interleukin-2 inhibitor                                                        | P60568 | 11   | 0.9965 | 0.997 | Secreted protein            | NA                |
| Interleukin-23 receptor antagonist                                             | Q5VWK5 | 528  | 0.9999 | 1.000 | Unclassified protein        | NA                |
| Interleukin-6 inhibitor                                                        | P05231 | 13   | 0.9598 | 0.96  | Secreted protein            | NA                |
| Interleukin-6 receptor subunit beta antagonist                                 | P40189 | 4    | 1.000  | 1.000 | Membrane receptor           | NA                |
| Interleukin-8 inhibitor                                                        | P10145 | 24   | 0.9992 | 0.999 | Secreted protein            | NA                |
| Intermediate conductance calcium-activated potassium channel protein 4 blocker | O15554 | 37   | 0.9882 | 0.988 | Ion channel                 | Voltage-gated ion |

|                                                                         |        |      |        |       |                         |                                     |
|-------------------------------------------------------------------------|--------|------|--------|-------|-------------------------|-------------------------------------|
|                                                                         |        |      |        |       |                         | channel                             |
| Interstitial collagenase inhibitor                                      | P03956 | 2016 | 0.9937 | 0.994 | Enzyme                  | Protease                            |
| Intestinal-type alkaline phosphatase inhibitor                          | P09923 | 95   | 0.9537 | 0.955 | Enzyme                  | Phosphatase                         |
| Isocitrate dehydrogenase [NADP] cytoplasmic inhibitor                   | O75874 | 1264 | 0.9966 | 0.997 | Enzyme                  | Oxidoreductase                      |
| Isocitrate dehydrogenase [NADP], mitochondrial inhibitor                | P48735 | 248  | 0.9975 | 0.997 | Enzyme                  | Oxidoreductase                      |
| Isoleucine--tRNA ligase, cytoplasmic inhibitor                          | P41252 | 20   | 0.9995 | 1.000 | Enzyme                  | Ligase                              |
| Kallikrein-1 inhibitor                                                  | P06870 | 181  | 0.9744 | 0.974 | Enzyme                  | Protease                            |
| Kallikrein-14 inhibitor                                                 | Q9P0G3 | 24   | 0.9723 | 0.973 | Enzyme                  | Protease                            |
| Kallikrein-2 inhibitor                                                  | P20151 | 15   | 0.9755 | 0.976 | Enzyme                  | Protease                            |
| Kallikrein-4 inhibitor                                                  | Q9Y5K2 | 20   | 0.9356 | 0.936 | Enzyme                  | Protease                            |
| Kallikrein-5 inhibitor                                                  | Q9Y337 | 97   | 0.9866 | 0.986 | Enzyme                  | Protease                            |
| Kallikrein-6 inhibitor                                                  | Q92876 | 34   | 0.9867 | 0.987 | Enzyme                  | Protease                            |
| Kallikrein-7 inhibitor                                                  | P49862 | 111  | 0.9896 | 0.99  | Enzyme                  | Protease                            |
| Kallikrein-8 inhibitor                                                  | O60259 | 28   | 0.9542 | 0.957 | Enzyme                  | Protease                            |
| Kappa-type opioid receptor agonist                                      | P41145 | 1022 | 0.9917 | 0.991 | Membrane receptor       | Family A G protein-coupled receptor |
| Kappa-type opioid receptor antagonist                                   | P41145 | 1637 | 0.9847 | 0.985 | Membrane receptor       | Family A G protein-coupled receptor |
| Kelch-like ECH-associated protein 1 inhibitor                           | Q14145 | 140  | 0.9928 | 0.993 | Unclassified protein    | NA                                  |
| Ketohexokinase inhibitor                                                | P50053 | 196  | 0.9992 | 0.999 | Enzyme                  | Transferase                         |
| Kinesin-like protein KIF11 inhibitor                                    | P52732 | 774  | 0.9955 | 0.996 | Other cytosolic protein | NA                                  |
| Kinesin-like protein KIF20A inhibitor                                   | O95235 | 8    | 1.000  | 1.000 | Other cytosolic protein | NA                                  |
| Kinesin-like protein KIFC1 inhibitor                                    | Q9BW19 | 17   | 1.000  | 1.000 | Other cytosolic protein | NA                                  |
| Kininogen-1 inhibitor                                                   | P01042 | 59   | 1.000  | 1.000 | Unclassified protein    | NA                                  |
| KiSS-1 receptor agonist                                                 | Q969F8 | 237  | 0.9998 | 1.000 | Membrane receptor       | Family A G protein-coupled receptor |
| KiSS-1 receptor antagonist                                              | Q969F8 | 38   | 0.9995 | 0.999 | Membrane receptor       | Family A G protein-coupled receptor |
| Krueppel-like factor 5 inhibitor                                        | Q13887 | 5    | 1.000  | 1.000 | Transcription factor    | NA                                  |
| Kynureninase inhibitor                                                  | Q16719 | 4    | 0.9524 | 0.953 | Enzyme                  | Hydrolase                           |
| Kynurenine 3-monooxygenase inhibitor                                    | O15229 | 157  | 0.9967 | 0.997 | Enzyme                  | Oxidoreductase                      |
| Kynurenine/alpha-aminoadipate aminotransferase, mitochondrial inhibitor | Q8N5Z0 | 59   | 0.9744 | 0.974 | Enzyme                  | Transferase                         |
| Kynurenine--oxoglutarate transaminase 3 inhibitor                       | Q6YP21 | 3    | 1.000  | 1.000 | Enzyme                  | NA                                  |
| Lactoylglutathione lyase inhibitor                                      | Q04760 | 94   | 0.9978 | 0.998 | Enzyme                  | Lyase                               |

|                                                                    |        |      |        |       |                      |                                     |
|--------------------------------------------------------------------|--------|------|--------|-------|----------------------|-------------------------------------|
| Lanosterol 14-alpha demethylase inhibitor                          | Q16850 | 29   | 0.9998 | 1.000 | Enzyme               | Cytochrome P450                     |
| Lanosterol synthase inhibitor                                      | P48449 | 114  | 0.9938 | 0.994 | Enzyme               | Isomerase                           |
| Large neutral amino acids transporter small subunit 1 inhibitor    | Q01650 | 5    | 0.9322 | 0.933 | Transporter          | Electrochemical transporter         |
| Legumain inhibitor                                                 | Q99538 | 113  | 0.9997 | 1.000 | Enzyme               | Protease                            |
| Lethal(3)malignant brain tumor-like protein 1 inhibitor            | Q9Y468 | 50   | 0.9693 | 0.97  | Epigenetic regulator | Reader                              |
| Lethal(3)malignant brain tumor-like protein 3 inhibitor            | Q96JM7 | 76   | 0.997  | 0.997 | Epigenetic regulator | Reader                              |
| Leucine-rich repeat serine/threonine-protein kinase 2 inhibitor    | Q5S007 | 1472 | 0.9925 | 0.993 | Enzyme               | Kinase                              |
| Leucine--tRNA ligase, cytoplasmic inhibitor                        | Q9P2J5 | 18   | 0.9761 | 0.977 | Enzyme               | Ligase                              |
| Leucyl-cystinyl aminopeptidase inhibitor                           | Q9UIQ6 | 137  | 0.9913 | 0.986 | Enzyme               | Protease                            |
| Leukocyte tyrosine kinase receptor antagonist                      | P29376 | 20   | 0.883  | 0.888 | Enzyme               | Kinase                              |
| Leukotriene A-4 hydrolase inhibitor                                | P09960 | 457  | 0.9979 | 0.998 | Enzyme               | Protease                            |
| Leukotriene B4 receptor 1 antagonist                               | Q15722 | 300  | 0.9981 | 0.998 | Membrane receptor    | Family A G protein-coupled receptor |
| Leukotriene B4 receptor 2 antagonist                               | Q9NPC1 | 237  | 0.9978 | 0.998 | Membrane receptor    | Family A G protein-coupled receptor |
| Leukotriene C4 synthase inhibitor                                  | Q16873 | 81   | 0.9977 | 0.998 | Enzyme               | Lyase                               |
| LIM domain kinase 1 inhibitor                                      | P53667 | 221  | 0.9838 | 0.984 | Enzyme               | Kinase                              |
| LIM domain kinase 2 inhibitor                                      | P53671 | 211  | 0.9934 | 0.993 | Enzyme               | Kinase                              |
| Lipoprotein lipase inhibitor                                       | P06858 | 11   | 0.8761 | 0.881 | Enzyme               | Hydrolase                           |
| Liver carboxylesterase 1 inhibitor                                 | P23141 | 244  | 0.993  | 0.993 | Enzyme               | NA                                  |
| L-lactate dehydrogenase A chain inhibitor                          | P00338 | 274  | 0.9731 | 0.973 | Enzyme               | NA                                  |
| L-lactate dehydrogenase B chain inhibitor                          | P07195 | 105  | 0.9849 | 0.985 | Enzyme               | Oxidoreductase                      |
| L-lactate dehydrogenase inhibitor                                  | V9HWB9 | 7    | 0.963  | 0.963 | Enzyme               | Oxidoreductase                      |
| Long-chain fatty acid transport protein 1 inhibitor                | Q6PCB7 | 36   | 1.000  | 1.000 | Transporter          | Electrochemical transporter         |
| Long-chain fatty acid transport protein 4 inhibitor                | Q6P1M0 | 21   | 1.000  | 1.000 | Transporter          | Electrochemical transporter         |
| Low affinity immunoglobulin epsilon Fc receptor antagonist         | P06734 | 48   | 1.000  | 1.000 | Membrane receptor    | NA                                  |
| Low molecular weight phosphotyrosine protein phosphatase inhibitor | P24666 | 49   | 0.9913 | 0.991 | Enzyme               | Phosphatase                         |
| Low-density lipoprotein receptor-related protein 6 antagonist      | O75581 | 11   | 1.000  | 1.000 | Unclassified protein | NA                                  |
| L-selectin inhibitor                                               | P14151 | 22   | 0.9998 | 1.000 | Adhesion             | NA                                  |
| Lutropin-choriogonadotropic hormone receptor agonist               | P22888 | 22   | 0.972  | 0.969 | Membrane receptor    | Family A G protein-coupled receptor |
| Lutropin-choriogonadotropic hormone receptor antagonist            | P22888 | 27   | 1.000  | 1.000 | Membrane receptor    | Family A G protein-coupled receptor |

|                                                                        |        |     |        |       |                      |                                     |
|------------------------------------------------------------------------|--------|-----|--------|-------|----------------------|-------------------------------------|
| Lymphocyte antigen 96 inhibitor                                        | Q9Y6Y9 | 4   | 1.000  | 1.000 | Surface antigen      | NA                                  |
| Lymphokine-activated killer T-cell-originated protein kinase inhibitor | Q96KB5 | 138 | 0.9915 | 0.992 | Enzyme               | Kinase                              |
| Lysine-specific demethylase 2A inhibitor                               | Q9Y2K7 | 60  | 0.9856 | 0.986 | Epigenetic regulator | Eraser; Reader                      |
| Lysine-specific demethylase 2B inhibitor                               | Q8NHM5 | 96  | 0.9998 | 1.000 | Epigenetic regulator | Eraser                              |
| Lysine-specific demethylase 3A inhibitor                               | Q9Y4C1 | 26  | 0.998  | 0.998 | Epigenetic regulator | Eraser                              |
| Lysine-specific demethylase 4A inhibitor                               | O75164 | 175 | 0.9911 | 0.991 | Epigenetic regulator | Eraser; Reader                      |
| Lysine-specific demethylase 4B inhibitor                               | O94953 | 89  | 0.9962 | 0.996 | Epigenetic regulator | Eraser                              |
| Lysine-specific demethylase 4C inhibitor                               | Q9H3R0 | 418 | 0.9957 | 0.996 | Epigenetic regulator | Eraser; Reader                      |
| Lysine-specific demethylase 4D inhibitor                               | Q6B0I6 | 22  | 0.9995 | 0.999 | Epigenetic regulator | Eraser                              |
| Lysine-specific demethylase 4E inhibitor                               | B2RXH2 | 42  | 0.99   | 0.99  | Epigenetic regulator | Eraser                              |
| Lysine-specific demethylase 5A inhibitor                               | P29375 | 247 | 0.9893 | 0.989 | Epigenetic regulator | Eraser; Reader                      |
| Lysine-specific demethylase 5B inhibitor                               | Q9UGL1 | 306 | 0.9956 | 0.996 | Epigenetic regulator | Eraser                              |
| Lysine-specific demethylase 5C inhibitor                               | P41229 | 135 | 0.9981 | 0.998 | Epigenetic regulator | Eraser; Reader                      |
| Lysine-specific demethylase 6B inhibitor                               | O15054 | 51  | 0.9933 | 0.994 | Epigenetic regulator | Eraser                              |
| Lysine-specific demethylase 7A inhibitor                               | Q6ZMT4 | 3   | 1.000  | 1.000 | Epigenetic regulator | Eraser; Reader                      |
| Lysine-specific histone demethylase 1A inhibitor                       | O60341 | 638 | 0.9879 | 0.988 | Epigenetic regulator | Eraser                              |
| Lysine-specific histone demethylase 1B inhibitor                       | Q8NB78 | 6   | 0.8471 | 0.848 | Epigenetic regulator | Eraser                              |
| Lysine--tRNA ligase inhibitor                                          | Q15046 | 81  | 0.9816 | 0.981 | Enzyme               | NA                                  |
| Lysophosphatidic acid receptor 1 agonist                               | Q92633 | 33  | 0.9902 | 0.99  | Membrane receptor    | Family A G protein-coupled receptor |
| Lysophosphatidic acid receptor 1 antagonist                            | Q92633 | 192 | 0.9957 | 0.996 | Membrane receptor    | Family A G protein-coupled receptor |
| Lysophosphatidic acid receptor 2 agonist                               | Q9HBW0 | 22  | 0.9999 | 1.000 | Membrane receptor    | Family A G protein-coupled receptor |
| Lysophosphatidic acid receptor 2 antagonist                            | Q9HBW0 | 52  | 0.9961 | 0.996 | Membrane receptor    | Family A G protein-coupled receptor |
| Lysophosphatidic acid receptor 3 agonist                               | Q9UBY5 | 16  | 1.000  | 1.000 | Membrane receptor    | Family A G protein-coupled receptor |
| Lysophosphatidic acid receptor 3 antagonist                            | Q9UBY5 | 68  | 0.998  | 0.998 | Membrane receptor    | Family A G protein-coupled receptor |
| Lysophosphatidic acid receptor 4 agonist                               | Q99677 | 7   | 1.000  | 1.000 | Membrane receptor    | Family A G protein-coupled receptor |
| Lysophosphatidic acid receptor 4 antagonist                            | Q99677 | 3   | 1.000  | 1.000 | Membrane receptor    | Family A G protein-coupled receptor |
| Lysophosphatidic acid receptor 5 agonist                               | Q9H1C0 | 7   | 1.000  | 1.000 | Membrane receptor    | Family A G protein-coupled receptor |
| Lysophosphatidic acid receptor 5 antagonist                            | Q9H1C0 | 83  | 0.9993 | 0.999 | Membrane receptor    | Family A G protein-                 |

|                                                                    |        |      |        |       |                      |                                     |
|--------------------------------------------------------------------|--------|------|--------|-------|----------------------|-------------------------------------|
|                                                                    |        |      |        |       |                      | coupled receptor                    |
| Lysophosphatidic acid receptor 6 agonist                           | P43657 | 7    | 1.000  | 1.000 | Membrane receptor    | Family A G protein-coupled receptor |
| Lysosomal acid glucosylceramidase inhibitor                        | P04062 | 413  | 0.9829 | 0.983 | Enzyme               | NA                                  |
| Lysosomal acid lipase/cholesteryl ester hydrolase inhibitor        | P38571 | 8    | 1.000  | 1.000 | Enzyme               | Hydrolase                           |
| Lysosomal alpha-glucosidase inhibitor                              | P10253 | 5172 | 0.8612 | 0.861 | Enzyme               | Hydrolase                           |
| Lysosomal alpha-mannosidase inhibitor                              | O00754 | 5    | 0.9999 | 1.000 | Enzyme               | Hydrolase                           |
| Lysosomal protective protein inhibitor                             | P10619 | 740  | 0.9994 | 0.999 | Enzyme               | Protease                            |
| Lysosomal Pro-X carboxypeptidase inhibitor                         | P42785 | 342  | 0.9986 | 0.999 | Enzyme               | Protease                            |
| Lysyl oxidase homolog 2 inhibitor                                  | Q9Y4K0 | 532  | 0.9993 | 0.999 | Enzyme               | Oxidoreductase                      |
| Lysyl oxidase homolog 3 inhibitor                                  | P58215 | 20   | 0.9926 | 0.903 | Enzyme               | Oxidoreductase                      |
| Lysyl oxidase homolog 4 inhibitor                                  | Q96JB6 | 6    | 0.9677 | 0.767 | Enzyme               | Oxidoreductase                      |
| m7GpppX diphosphatase inhibitor                                    | Q96C86 | 41   | 0.9999 | 1.000 | Enzyme               | Hydrolase                           |
| Macrophage colony-stimulating factor 1 receptor antagonist         | P07333 | 1238 | 0.9859 | 0.986 | Enzyme               | Kinase                              |
| Macrophage metalloelastase inhibitor                               | P39900 | 457  | 0.993  | 0.993 | Enzyme               | Protease                            |
| Macrophage migration inhibitory factor inhibitor                   | P14174 | 171  | 0.9709 | 0.971 | Enzyme               | NA                                  |
| Macrophage-expressed gene 1 protein inhibitor                      | Q2M385 | 4    | 0.8695 | 0.871 | Unclassified protein | NA                                  |
| Macrophage-stimulating protein receptor antagonist                 | Q04912 | 99   | 0.9768 | 0.977 | Enzyme               | Kinase                              |
| Major prion protein inhibitor                                      | P04156 | 7    | 1.000  | 1.000 | Surface antigen      | NA                                  |
| Malate dehydrogenase, cytoplasmic inhibitor                        | P40925 | 19   | 0.9984 | 0.998 | Enzyme               | Oxidoreductase                      |
| Malate dehydrogenase, mitochondrial inhibitor                      | P40926 | 32   | 0.9963 | 0.997 | Enzyme               | Oxidoreductase                      |
| Malonyl-CoA decarboxylase, mitochondrial inhibitor                 | O95822 | 250  | 1.000  | 1.000 | Enzyme               | Lyase                               |
| Maltase-glucoamylase inhibitor                                     | O43451 | 66   | 0.9917 | 0.992 | Enzyme               | Hydrolase                           |
| Mannan-binding lectin serine protease 1 inhibitor                  | P48740 | 3    | 0.9996 | 1.000 | Enzyme               | Hydrolase                           |
| Mannan-binding lectin serine protease 2 inhibitor                  | O00187 | 5    | 0.9993 | 0.998 | Enzyme               | Hydrolase                           |
| Mannose-6-phosphate isomerase inhibitor                            | P34949 | 102  | 0.9423 | 0.943 | Enzyme               | Isomerase                           |
| MAP kinase-activated protein kinase 2 inhibitor                    | P49137 | 793  | 0.9855 | 0.985 | Enzyme               | Kinase                              |
| MAP kinase-activated protein kinase 3 inhibitor                    | Q16644 | 14   | 0.9632 | 0.95  | Enzyme               | Kinase                              |
| MAP kinase-activated protein kinase 5 inhibitor                    | Q8IW41 | 60   | 0.8933 | 0.894 | Enzyme               | Kinase                              |
| MAP kinase-interacting serine/threonine-protein kinase 1 inhibitor | Q9BUB5 | 325  | 0.9843 | 0.984 | Enzyme               | Kinase                              |
| MAP kinase-interacting serine/threonine-protein kinase 2 inhibitor | Q9HBH9 | 639  | 0.9928 | 0.993 | Enzyme               | Kinase                              |
| MAP/microtubule affinity-regulating kinase 3 inhibitor             | P27448 | 62   | 0.9373 | 0.938 | Enzyme               | Kinase                              |
| MAP/microtubule affinity-regulating kinase 4 inhibitor             | Q96L34 | 24   | 0.9321 | 0.933 | Enzyme               | Kinase                              |

|                                                             |        |      |        |       |                      |                                     |
|-------------------------------------------------------------|--------|------|--------|-------|----------------------|-------------------------------------|
| Mas-related G-protein coupled receptor member X1 agonist    | Q96LB2 | 48   | 0.9999 | 1.000 | Membrane receptor    | Family A G protein-coupled receptor |
| Mas-related G-protein coupled receptor member X1 antagonist | Q96LB2 | 31   | 0.9998 | 1.000 | Membrane receptor    | Family A G protein-coupled receptor |
| Mas-related G-protein coupled receptor member X2 agonist    | Q96LB1 | 8    | 0.8625 | 0.867 | Membrane receptor    | Family A G protein-coupled receptor |
| Mast cell carboxypeptidase A inhibitor                      | P15088 | 3    | 1.000  | 1.000 | Enzyme               | Protease                            |
| Mast/stem cell growth factor receptor Kit antagonist        | P10721 | 1267 | 0.9775 | 0.977 | Enzyme               | Kinase                              |
| Maternal embryonic leucine zipper kinase inhibitor          | Q14680 | 815  | 0.9854 | 0.985 | Enzyme               | Kinase                              |
| Matrilysin inhibitor                                        | P09237 | 388  | 0.9968 | 0.997 | Enzyme               | Protease                            |
| Matrix metalloproteinase-14 inhibitor                       | P50281 | 546  | 0.9898 | 0.99  | Enzyme               | Protease                            |
| Matrix metalloproteinase-15 inhibitor                       | P51511 | 19   | 0.9991 | 0.992 | Enzyme               | Protease                            |
| Matrix metalloproteinase-16 inhibitor                       | P51512 | 48   | 0.9992 | 0.999 | Enzyme               | Protease                            |
| Matrix metalloproteinase-17 inhibitor                       | Q9ULZ9 | 18   | 1.000  | 1.000 | Enzyme               | Protease                            |
| Matrix metalloproteinase-25 inhibitor                       | Q9NPA2 | 9    | 0.9984 | 0.998 | Enzyme               | Protease                            |
| Matrix metalloproteinase-26 inhibitor                       | Q9NRE1 | 13   | 0.9995 | 1.000 | Enzyme               | Protease                            |
| Matrix metalloproteinase-9 inhibitor                        | P14780 | 2078 | 0.9894 | 0.989 | Enzyme               | Protease                            |
| MBT domain-containing protein 1 inhibitor                   | Q05BQ5 | 14   | 1.000  | 1.000 | Epigenetic regulator | Reader                              |
| Melanin-concentrating hormone receptor 1 agonist            | Q99705 | 8    | 0.992  | 0.992 | Membrane receptor    | Family A G protein-coupled receptor |
| Melanin-concentrating hormone receptor 1 antagonist         | Q99705 | 2127 | 0.9926 | 0.993 | Membrane receptor    | Family A G protein-coupled receptor |
| Melanin-concentrating hormone receptor 2 antagonist         | Q969V1 | 74   | 0.9995 | 1.000 | Membrane receptor    | Family A G protein-coupled receptor |
| Melanocortin receptor 3 agonist                             | P41968 | 352  | 0.9983 | 0.998 | Membrane receptor    | Family A G protein-coupled receptor |
| Melanocortin receptor 3 antagonist                          | P41968 | 269  | 0.9961 | 0.996 | Membrane receptor    | Family A G protein-coupled receptor |
| Melanocortin receptor 4 agonist                             | P32245 | 876  | 0.998  | 0.998 | Membrane receptor    | Family A G protein-coupled receptor |
| Melanocortin receptor 4 antagonist                          | P32245 | 1124 | 0.9969 | 0.997 | Membrane receptor    | Family A G protein-coupled receptor |
| Melanocortin receptor 5 agonist                             | P33032 | 124  | 0.9989 | 0.999 | Membrane receptor    | Family A G protein-coupled receptor |
| Melanocortin receptor 5 antagonist                          | P33032 | 641  | 0.9981 | 0.998 | Membrane receptor    | Family A G protein-coupled receptor |
| Melanocyte-stimulating hormone receptor agonist             | Q01726 | 529  | 0.9979 | 0.998 | Membrane receptor    | Family A G protein-coupled receptor |
| Melanocyte-stimulating hormone receptor antagonist          | Q01726 | 310  | 0.9959 | 0.996 | Membrane receptor    | Family A G protein-                 |



|                                                                                        |        |      |        |       |                      |                                     |
|----------------------------------------------------------------------------------------|--------|------|--------|-------|----------------------|-------------------------------------|
|                                                                                        |        |      |        |       |                      | coupled receptor                    |
| Melatonin receptor type 1A agonist                                                     | P48039 | 79   | 0.9923 | 0.992 | Membrane receptor    | Family A G protein-coupled receptor |
| Melatonin receptor type 1A antagonist                                                  | P48039 | 540  | 0.9981 | 0.998 | Membrane receptor    | Family A G protein-coupled receptor |
| Melatonin receptor type 1B agonist                                                     | P49286 | 88   | 0.9959 | 0.995 | Membrane receptor    | Family A G protein-coupled receptor |
| Melatonin receptor type 1B antagonist                                                  | P49286 | 579  | 0.9978 | 0.998 | Membrane receptor    | Family A G protein-coupled receptor |
| Membrane metallo-endopeptidase-like 1 inhibitor                                        | Q495T6 | 56   | 0.9999 | 1.000 | Enzyme               | Hydrolase                           |
| Membrane primary amine oxidase inhibitor                                               | Q16853 | 209  | 0.9984 | 0.999 | Enzyme               | Oxidoreductase                      |
| Membrane-associated guanylate kinase, WW and PDZ domain-containing protein 3 inhibitor | Q5TCQ9 | 6    | 1.000  | 1.000 | Enzyme               | NA                                  |
| Membrane-associated tyrosine- and threonine-specific cdc2-inhibitory kinase inhibitor  | Q99640 | 31   | 0.956  | 0.957 | Enzyme               | Kinase                              |
| Membrane-bound transcription factor site-1 protease inhibitor                          | Q14703 | 19   | 1.000  | 1.000 | Enzyme               | Protease                            |
| Menin inhibitor                                                                        | O00255 | 184  | 0.9945 | 0.995 | Unclassified protein | NA                                  |
| Meprin A subunit alpha inhibitor                                                       | Q16819 | 7    | 0.9999 | 1.000 | Enzyme               | Hydrolase                           |
| Meprin A subunit beta inhibitor                                                        | Q16820 | 57   | 0.9977 | 0.998 | Enzyme               | Hydrolase                           |
| Metabotropic glutamate receptor 1 agonist                                              | Q13255 | 15   | 0.9946 | 0.995 | Membrane receptor    | Family C G protein-coupled receptor |
| Metabotropic glutamate receptor 1 antagonist                                           | Q13255 | 523  | 0.9921 | 0.992 | Membrane receptor    | Family C G protein-coupled receptor |
| Metabotropic glutamate receptor 2 agonist                                              | Q14416 | 467  | 0.9992 | 0.999 | Membrane receptor    | Family C G protein-coupled receptor |
| Metabotropic glutamate receptor 2 antagonist                                           | Q14416 | 858  | 0.9979 | 0.998 | Membrane receptor    | Family C G protein-coupled receptor |
| Metabotropic glutamate receptor 3 agonist                                              | Q14832 | 51   | 0.9925 | 0.993 | Membrane receptor    | Family C G protein-coupled receptor |
| Metabotropic glutamate receptor 3 antagonist                                           | Q14832 | 75   | 0.993  | 0.993 | Membrane receptor    | Family C G protein-coupled receptor |
| Metabotropic glutamate receptor 4 agonist                                              | Q14833 | 50   | 0.9719 | 0.972 | Membrane receptor    | Family C G protein-coupled receptor |
| Metabotropic glutamate receptor 4 antagonist                                           | Q14833 | 9    | 0.9997 | 1.000 | Membrane receptor    | Family C G protein-coupled receptor |
| Metabotropic glutamate receptor 5 agonist                                              | P41594 | 321  | 0.9931 | 0.993 | Membrane receptor    | Family C G protein-coupled receptor |
| Metabotropic glutamate receptor 5 antagonist                                           | P41594 | 1128 | 0.9948 | 0.995 | Membrane receptor    | Family C G protein-coupled receptor |
| Metabotropic glutamate receptor 6 agonist                                              | O15303 | 35   | 0.9999 | 1.000 | Membrane receptor    | Family C G protein-coupled receptor |

|                                                                    |        |      |        |       |                         |                                     |
|--------------------------------------------------------------------|--------|------|--------|-------|-------------------------|-------------------------------------|
| Metabotropic glutamate receptor 6 antagonist                       | O15303 | 23   | 0.9639 | 0.964 | Membrane receptor       | Family C G protein-coupled receptor |
| Metabotropic glutamate receptor 7 agonist                          | Q14831 | 15   | 0.9386 | 0.796 | Membrane receptor       | Family C G protein-coupled receptor |
| Metabotropic glutamate receptor 7 antagonist                       | Q14831 | 4    | 1.000  | 1.000 | Membrane receptor       | Family C G protein-coupled receptor |
| Metabotropic glutamate receptor 8 agonist                          | O00222 | 45   | 0.9998 | 0.969 | Membrane receptor       | Family C G protein-coupled receptor |
| Metabotropic glutamate receptor 8 antagonist                       | O00222 | 13   | 0.9997 | 1.000 | Membrane receptor       | Family C G protein-coupled receptor |
| Methionine aminopeptidase 1 inhibitor                              | P53582 | 124  | 0.9954 | 0.996 | Enzyme                  | Protease                            |
| Methionine aminopeptidase 2 inhibitor                              | P50579 | 653  | 0.9987 | 0.999 | Enzyme                  | Protease                            |
| Methionine synthase inhibitor                                      | Q99707 | 3    | 1.000  | 1.000 | Enzyme                  | Transferase                         |
| Methionine--tRNA ligase, cytoplasmic inhibitor                     | P56192 | 59   | 0.9999 | 1.000 | Enzyme                  | Ligase                              |
| Methylated-DNA--protein-cysteine methyltransferase inhibitor       | P16455 | 31   | 0.9966 | 0.997 | Enzyme                  | NA                                  |
| Methyl-CpG-binding domain protein 2 inhibitor                      | Q9UBB5 | 7    | 0.9779 | 0.978 | Epigenetic regulator    | Reader                              |
| Methyl-CpG-binding protein 2 inhibitor                             | P51608 | 3    | 0.9191 | 0.923 | Epigenetic regulator    | Reader                              |
| Microsomal triglyceride transfer protein large subunit inhibitor   | P55157 | 154  | 1.000  | 1.000 | Other cytosolic protein | NA                                  |
| Microtubule-associated protein 2 inhibitor                         | P11137 | 20   | 0.9628 | 0.963 | Other cytosolic protein | NA                                  |
| Microtubule-associated protein tau inhibitor                       | P10636 | 75   | 0.9898 | 0.99  | Other cytosolic protein | NA                                  |
| Microtubule-associated serine/threonine-protein kinase 3 inhibitor | O60307 | 8    | 1.000  | 1.000 | Enzyme                  | Kinase                              |
| Microtubule-associated serine/threonine-protein kinase 4 inhibitor | O15021 | 4    | 1.000  | 1.000 | Enzyme                  | Kinase                              |
| Mineralocorticoid receptor antagonist                              | P08235 | 709  | 0.9936 | 0.993 | Transcription factor    | Nuclear receptor                    |
| Misshapen-like kinase 1 inhibitor                                  | Q8N4C8 | 22   | 0.8988 | 0.898 | Enzyme                  | Kinase                              |
| Mitogen-activated protein kinase 1 inhibitor                       | P28482 | 3920 | 0.8309 | 0.831 | Enzyme                  | Kinase                              |
| Mitogen-activated protein kinase 10 inhibitor                      | P53779 | 920  | 0.9824 | 0.983 | Enzyme                  | Kinase                              |
| Mitogen-activated protein kinase 11 inhibitor                      | Q15759 | 743  | 0.9853 | 0.985 | Enzyme                  | Kinase                              |
| Mitogen-activated protein kinase 12 inhibitor                      | P53778 | 91   | 0.9524 | 0.954 | Enzyme                  | Kinase                              |
| Mitogen-activated protein kinase 13 inhibitor                      | O15264 | 80   | 0.9201 | 0.92  | Enzyme                  | Kinase                              |
| Mitogen-activated protein kinase 14 inhibitor                      | Q16539 | 3681 | 0.984  | 0.984 | Enzyme                  | Kinase                              |
| Mitogen-activated protein kinase 3 inhibitor                       | P27361 | 244  | 0.952  | 0.952 | Enzyme                  | Kinase                              |
| Mitogen-activated protein kinase 6 inhibitor                       | Q16659 | 3    | 0.983  | 0.983 | Enzyme                  | Kinase                              |
| Mitogen-activated protein kinase 7 inhibitor                       | Q13164 | 85   | 0.9835 | 0.983 | Enzyme                  | Kinase                              |
| Mitogen-activated protein kinase 8 inhibitor                       | P45983 | 1087 | 0.9862 | 0.986 | Enzyme                  | Kinase                              |
| Mitogen-activated protein kinase 9 inhibitor                       | P45984 | 654  | 0.9809 | 0.981 | Enzyme                  | Kinase                              |

|                                                                              |        |     |        |       |                   |                                     |
|------------------------------------------------------------------------------|--------|-----|--------|-------|-------------------|-------------------------------------|
| Mitogen-activated protein kinase kinase kinase 10 inhibitor                  | Q02779 | 23  | 0.9367 | 0.934 | Enzyme            | Kinase                              |
| Mitogen-activated protein kinase kinase kinase 11 inhibitor                  | Q16584 | 47  | 0.9392 | 0.939 | Enzyme            | Kinase                              |
| Mitogen-activated protein kinase kinase kinase 12 inhibitor                  | Q12852 | 586 | 0.9988 | 0.999 | Enzyme            | Kinase                              |
| Mitogen-activated protein kinase kinase kinase 14 inhibitor                  | Q99558 | 592 | 0.9971 | 0.997 | Enzyme            | Kinase                              |
| Mitogen-activated protein kinase kinase kinase 15 inhibitor                  | Q6ZN16 | 3   | 0.983  | 0.983 | Enzyme            | Kinase                              |
| Mitogen-activated protein kinase kinase kinase 20 inhibitor                  | Q9NYL2 | 53  | 0.934  | 0.934 | Enzyme            | Kinase                              |
| Mitogen-activated protein kinase kinase kinase 4 inhibitor                   | Q9Y6R4 | 3   | 0.983  | 0.983 | Enzyme            | Kinase                              |
| Mitogen-activated protein kinase kinase kinase 5 inhibitor                   | Q99683 | 207 | 0.9824 | 0.978 | Enzyme            | Kinase                              |
| Mitogen-activated protein kinase kinase kinase 7 inhibitor                   | O43318 | 213 | 0.9815 | 0.981 | Enzyme            | Kinase                              |
| Mitogen-activated protein kinase kinase kinase 8 inhibitor                   | P41279 | 226 | 0.9916 | 0.992 | Enzyme            | Kinase                              |
| Mitogen-activated protein kinase kinase kinase 9 inhibitor                   | P80192 | 54  | 0.9468 | 0.947 | Enzyme            | Kinase                              |
| Mitogen-activated protein kinase kinase kinase kinase 1 inhibitor            | Q92918 | 5   | 0.9359 | 0.937 | Enzyme            | Kinase                              |
| Mitogen-activated protein kinase kinase kinase kinase 2 inhibitor            | Q12851 | 51  | 0.9507 | 0.949 | Enzyme            | Kinase                              |
| Mitogen-activated protein kinase kinase kinase kinase 4 inhibitor            | O95819 | 113 | 0.9491 | 0.95  | Enzyme            | Kinase                              |
| Mitotic checkpoint serine/threonine-protein kinase BUB1 inhibitor            | O43683 | 7   | 0.874  | 0.875 | Enzyme            | Kinase                              |
| Monoacylglycerol lipase ABHD6 inhibitor                                      | Q9BV23 | 74  | 0.9838 | 0.984 | Enzyme            | Hydrolase                           |
| Monocarboxylate transporter 1 inhibitor                                      | P53985 | 58  | 1.000  | 1.000 | Transporter       | Electrochemical transporter         |
| Monocarboxylate transporter 4 inhibitor                                      | O15427 | 9   | 1.000  | 1.000 | Transporter       | Electrochemical transporter         |
| Monoglyceride lipase inhibitor                                               | Q99685 | 422 | 0.9942 | 0.994 | Enzyme            | Hydrolase                           |
| Motilin receptor agonist                                                     | O43193 | 175 | 0.9864 | 0.986 | Membrane receptor | Family A G protein-coupled receptor |
| Motilin receptor antagonist                                                  | O43193 | 27  | 0.9764 | 0.977 | Membrane receptor | Family A G protein-coupled receptor |
| M-phase inducer phosphatase 1 inhibitor                                      | P30304 | 178 | 0.9875 | 0.987 | Enzyme            | Phosphatase                         |
| M-phase inducer phosphatase 2 inhibitor                                      | P30305 | 356 | 0.9911 | 0.991 | Enzyme            | Phosphatase                         |
| M-phase inducer phosphatase 3 inhibitor                                      | P30307 | 54  | 0.9786 | 0.979 | Enzyme            | Phosphatase                         |
| Mucosa-associated lymphoid tissue lymphoma translocation protein 1 inhibitor | Q9UDY8 | 84  | 0.9974 | 0.997 | Enzyme            | Hydrolase                           |
| Multidrug resistance-associated protein 1 inhibitor                          | P33527 | 263 | 0.9708 | 0.965 | Transporter       | Primary active transporter          |
| Multidrug resistance-associated protein 5 inhibitor                          | O15440 | 3   | 1.000  | 1.000 | Transporter       | Primary active transporter          |
| Muscarinic acetylcholine receptor M1 agonist                                 | P11229 | 283 | 0.9971 | 0.997 | Membrane receptor | Family A G protein-coupled receptor |
| Muscarinic acetylcholine receptor M1 antagonist                              | P11229 | 807 | 0.9794 | 0.98  | Membrane receptor | Family A G protein-                 |

|                                                                      |        |      |        |       |                      |                                     |
|----------------------------------------------------------------------|--------|------|--------|-------|----------------------|-------------------------------------|
|                                                                      |        |      |        |       |                      | coupled receptor                    |
| Muscarinic acetylcholine receptor M2 agonist                         | P08172 | 66   | 0.9931 | 0.993 | Membrane receptor    | Family A G protein-coupled receptor |
| Muscarinic acetylcholine receptor M2 antagonist                      | P08172 | 920  | 0.9835 | 0.984 | Membrane receptor    | Family A G protein-coupled receptor |
| Muscarinic acetylcholine receptor M3 agonist                         | P20309 | 34   | 0.9935 | 0.994 | Membrane receptor    | Family A G protein-coupled receptor |
| Muscarinic acetylcholine receptor M3 antagonist                      | P20309 | 829  | 0.9871 | 0.987 | Membrane receptor    | Family A G protein-coupled receptor |
| Muscarinic acetylcholine receptor M4 agonist                         | P08173 | 87   | 0.9972 | 0.997 | Membrane receptor    | Family A G protein-coupled receptor |
| Muscarinic acetylcholine receptor M4 antagonist                      | P08173 | 440  | 0.9831 | 0.983 | Membrane receptor    | Family A G protein-coupled receptor |
| Muscarinic acetylcholine receptor M5 agonist                         | P08912 | 47   | 0.9849 | 0.986 | Membrane receptor    | Family A G protein-coupled receptor |
| Muscarinic acetylcholine receptor M5 antagonist                      | P08912 | 331  | 0.9778 | 0.978 | Membrane receptor    | Family A G protein-coupled receptor |
| Mu-type opioid receptor agonist                                      | P35372 | 911  | 0.9926 | 0.993 | Membrane receptor    | Family A G protein-coupled receptor |
| Mu-type opioid receptor antagonist                                   | P35372 | 1887 | 0.9866 | 0.987 | Membrane receptor    | Family A G protein-coupled receptor |
| Myc proto-oncogene protein inhibitor                                 | P01106 | 407  | 0.9992 | 0.999 | Transcription factor | NA                                  |
| Myelin-associated glycoprotein inhibitor                             | P20916 | 12   | 1.000  | 1.000 | Adhesion             | NA                                  |
| Myeloblastin inhibitor                                               | P24158 | 31   | 0.9985 | 0.997 | Enzyme               | Protease                            |
| Myeloperoxidase inhibitor                                            | P05164 | 281  | 0.9852 | 0.985 | Enzyme               | Oxidoreductase                      |
| Myoglobin inhibitor                                                  | P02144 | 4    | 0.9989 | 0.999 | Unclassified protein | NA                                  |
| Myosin light chain kinase, smooth muscle inhibitor                   | Q15746 | 57   | 0.9164 | 0.913 | Enzyme               | Kinase                              |
| N(G),N(G)-dimethylarginine dimethylaminohydrolase 1 inhibitor        | O94760 | 18   | 0.9607 | 0.963 | Enzyme               | Hydrolase                           |
| Na(+)/H(+) exchange regulatory cofactor NHE-RF1 inhibitor            | O14745 | 4    | 1.000  | 1.000 | Unclassified protein | NA                                  |
| N-acetylated-alpha-linked acidic dipeptidase 2 inhibitor             | Q9Y3Q0 | 21   | 0.9999 | 1.000 | Enzyme               | Protease                            |
| NACHT, LRR and PYD domains-containing protein 3 inhibitor            | Q96P20 | 48   | 0.9904 | 0.991 | Unclassified protein | NA                                  |
| N-acyl ethanolamine-hydrolyzing acid amidase inhibitor               | Q02083 | 123  | 0.9906 | 0.991 | Enzyme               | Hydrolase                           |
| NAD(+) hydrolase SARM1 inhibitor                                     | Q6SZW1 | 5    | 1.000  | 1.000 | Enzyme               | Hydrolase                           |
| NAD(P)H dehydrogenase [quinone] 1 inhibitor                          | P15559 | 130  | 0.9937 | 0.994 | Enzyme               | Oxidoreductase                      |
| NAD-dependent protein deacetylase sirtuin-1 inhibitor                | Q96EB6 | 226  | 0.9753 | 0.97  | Epigenetic regulator | Eraser                              |
| NAD-dependent protein deacetylase sirtuin-2 inhibitor                | Q8IXJ6 | 474  | 0.9912 | 0.991 | Epigenetic regulator | Eraser                              |
| NAD-dependent protein deacetylase sirtuin-3, mitochondrial inhibitor | Q9NTG7 | 139  | 0.987  | 0.987 | Epigenetic regulator | Eraser                              |

|                                                                        |        |     |        |       |                      |                                            |
|------------------------------------------------------------------------|--------|-----|--------|-------|----------------------|--------------------------------------------|
| NAD-dependent protein deacetylase sirtuin-6 inhibitor                  | Q8N6T7 | 9   | 0.8447 | 0.848 | Epigenetic regulator | Eraser                                     |
| NAD-dependent protein deacylase sirtuin-5, mitochondrial inhibitor     | Q9NXA8 | 54  | 0.9825 | 0.983 | Epigenetic regulator | Eraser                                     |
| NADH dehydrogenase [ubiquinone] 1 alpha subcomplex subunit 6 inhibitor | P56556 | 3   | 0.9886 | 0.989 | Enzyme               | Oxidoreductase                             |
| NADH-ubiquinone oxidoreductase chain 4 inhibitor                       | P03905 | 4   | 1.000  | 1.000 | Enzyme               | Oxidoreductase                             |
| NADP-dependent malic enzyme inhibitor                                  | P48163 | 6   | 1.000  | 1.000 | Enzyme               | NA                                         |
| NADPH oxidase 1 inhibitor                                              | Q9Y5S8 | 12  | 0.9992 | 0.918 | Transporter          | Transmembrane 1-electron transfer carriers |
| NADPH oxidase 4 inhibitor                                              | Q9NPH5 | 109 | 0.9927 | 0.993 | Enzyme               | NA                                         |
| N-alpha-acetyltransferase 50 inhibitor                                 | Q9GZZ1 | 11  | 0.9161 | 0.917 | Enzyme               | Transferase                                |
| N-arachidonyl glycine receptor agonist                                 | Q14330 | 4   | 0.9211 | 0.878 | Membrane receptor    | Family A G protein-coupled receptor        |
| N-arachidonyl glycine receptor antagonist                              | Q14330 | 26  | 0.972  | 0.972 | Membrane receptor    | Family A G protein-coupled receptor        |
| Natriuretic peptides A inhibitor                                       | P01160 | 11  | 0.999  | 0.999 | Secreted protein     | NA                                         |
| Natural resistance-associated macrophage protein 2 inhibitor           | P49281 | 39  | 1.000  | 1.000 | Transporter          | Electrochemical transporter                |
| NEDD8-activating enzyme E1 catalytic subunit inhibitor                 | Q8TBC4 | 47  | 0.9943 | 0.994 | Enzyme               | Ligase                                     |
| Neprilysin inhibitor                                                   | P08473 | 425 | 0.9983 | 0.998 | Enzyme               | Protease                                   |
| Neuroendocrine convertase 1 inhibitor                                  | P29120 | 12  | 1.000  | 1.000 | Enzyme               | Protease                                   |
| Neuroendocrine convertase 2 inhibitor                                  | P16519 | 12  | 1.000  | 1.000 | Enzyme               | Protease                                   |
| Neurogenic locus notch homolog protein 1 inhibitor                     | P46531 | 42  | 0.9997 | 1.000 | Membrane receptor    | NA                                         |
| Neurogenic locus notch homolog protein 3 inhibitor                     | Q9UM47 | 20  | 1.000  | 1.000 | Membrane receptor    | NA                                         |
| Neuromedin-B receptor agonist                                          | P28336 | 3   | 0.85   | 0.853 | Membrane receptor    | Family A G protein-coupled receptor        |
| Neuromedin-B receptor antagonist                                       | P28336 | 63  | 0.9983 | 0.998 | Membrane receptor    | Family A G protein-coupled receptor        |
| Neuromedin-K receptor agonist                                          | P29371 | 62  | 1.000  | 1.000 | Membrane receptor    | Family A G protein-coupled receptor        |
| Neuromedin-K receptor antagonist                                       | P29371 | 571 | 0.9964 | 0.997 | Membrane receptor    | Family A G protein-coupled receptor        |
| Neuromedin-U receptor 1 agonist                                        | Q9HB89 | 151 | 0.9997 | 1.000 | Membrane receptor    | Family A G protein-coupled receptor        |
| Neuromedin-U receptor 1 antagonist                                     | Q9HB89 | 4   | 0.9999 | 1.000 | Membrane receptor    | Family A G protein-coupled receptor        |
| Neuromedin-U receptor 2 agonist                                        | Q9GZQ4 | 166 | 0.9957 | 0.996 | Membrane receptor    | Family A G protein-coupled receptor        |
| Neuromedin-U receptor 2 antagonist                                     | Q9GZQ4 | 4   | 0.9999 | 1.000 | Membrane receptor    | Family A G protein-                        |

|                                                            |        |      |        |       |                   |                                     |
|------------------------------------------------------------|--------|------|--------|-------|-------------------|-------------------------------------|
|                                                            |        |      |        |       |                   | coupled receptor                    |
| Neuronal acetylcholine receptor subunit alpha-2 antagonist | Q15822 | 17   | 0.9705 | 0.971 | Ion channel       | Ligand-gated ion channel            |
| Neuronal acetylcholine receptor subunit alpha-3 agonist    | P32297 | 136  | 0.9963 | 0.996 | Ion channel       | Ligand-gated ion channel            |
| Neuronal acetylcholine receptor subunit alpha-3 antagonist | P32297 | 238  | 0.9834 | 0.984 | Ion channel       | Ligand-gated ion channel            |
| Neuronal acetylcholine receptor subunit alpha-4 agonist    | P43681 | 259  | 0.9993 | 0.999 | Ion channel       | Ligand-gated ion channel            |
| Neuronal acetylcholine receptor subunit alpha-4 antagonist | P43681 | 416  | 0.9866 | 0.984 | Ion channel       | Ligand-gated ion channel            |
| Neuronal acetylcholine receptor subunit alpha-6 antagonist | Q15825 | 6    | 1.000  | 1.000 | Ion channel       | Ligand-gated ion channel            |
| Neuronal acetylcholine receptor subunit alpha-7 agonist    | P36544 | 225  | 0.9974 | 0.998 | Ion channel       | Ligand-gated ion channel            |
| Neuronal acetylcholine receptor subunit alpha-7 antagonist | P36544 | 155  | 0.9721 | 0.972 | Ion channel       | Ligand-gated ion channel            |
| Neuronal acetylcholine receptor subunit alpha-9 antagonist | Q9UGM1 | 35   | 0.9988 | 0.999 | Ion channel       | Ligand-gated ion channel            |
| Neuronal acetylcholine receptor subunit beta-4 antagonist  | P30926 | 50   | 0.9962 | 0.997 | Ion channel       | Ligand-gated ion channel            |
| Neuropeptide FF receptor 1 agonist                         | Q9GZQ6 | 26   | 0.9993 | 0.999 | Membrane receptor | Family A G protein-coupled receptor |
| Neuropeptide FF receptor 1 antagonist                      | Q9GZQ6 | 10   | 0.9987 | 0.999 | Membrane receptor | Family A G protein-coupled receptor |
| Neuropeptide FF receptor 2 agonist                         | Q9Y5X5 | 35   | 0.9998 | 1.000 | Membrane receptor | Family A G protein-coupled receptor |
| Neuropeptide FF receptor 2 antagonist                      | Q9Y5X5 | 7    | 0.9979 | 0.998 | Membrane receptor | Family A G protein-coupled receptor |
| Neuropeptide S receptor antagonist                         | Q6W5P4 | 7063 | 0.8783 | 0.878 | Membrane receptor | Family A G protein-coupled receptor |
| Neuropeptide Y receptor type 1 agonist                     | P25929 | 12   | 0.812  | 0.812 | Membrane receptor | Family A G protein-coupled receptor |
| Neuropeptide Y receptor type 1 antagonist                  | P25929 | 292  | 0.9831 | 0.983 | Membrane receptor | Family A G protein-coupled receptor |
| Neuropeptide Y receptor type 2 agonist                     | P49146 | 82   | 0.9996 | 1.000 | Membrane receptor | Family A G protein-coupled receptor |
| Neuropeptide Y receptor type 2 antagonist                  | P49146 | 238  | 0.9232 | 0.925 | Membrane receptor | Family A G protein-coupled receptor |
| Neuropeptide Y receptor type 4 agonist                     | P50391 | 65   | 0.9991 | 0.999 | Membrane receptor | Family A G protein-coupled receptor |
| Neuropeptide Y receptor type 4 antagonist                  | P50391 | 30   | 0.9998 | 1.000 | Membrane receptor | Family A G protein-coupled receptor |

|                                                  |        |      |        |       |                                        |                                     |
|--------------------------------------------------|--------|------|--------|-------|----------------------------------------|-------------------------------------|
| Neuropeptide Y receptor type 5 agonist           | Q15761 | 6    | 0.9989 | 0.999 | Membrane receptor                      | Family A G protein-coupled receptor |
| Neuropeptide Y receptor type 5 antagonist        | Q15761 | 776  | 0.993  | 0.993 | Membrane receptor                      | Family A G protein-coupled receptor |
| Neuropeptides B/W receptor type 1 antagonist     | P48145 | 169  | 0.9871 | 0.987 | Membrane receptor                      | Family A G protein-coupled receptor |
| Neuropilin-1 inhibitor                           | O14786 | 37   | 0.9811 | 0.981 | Membrane receptor;<br>Secreted protein | NA                                  |
| Neurotensin receptor type 1 agonist              | P30989 | 92   | 0.9957 | 0.996 | Membrane receptor                      | Family A G protein-coupled receptor |
| Neurotensin receptor type 1 antagonist           | P30989 | 69   | 0.9908 | 0.988 | Membrane receptor                      | Family A G protein-coupled receptor |
| Neurotensin receptor type 2 agonist              | O95665 | 6    | 0.9999 | 1.000 | Membrane receptor                      | Family A G protein-coupled receptor |
| Neurotensin receptor type 2 antagonist           | O95665 | 27   | 0.9743 | 0.975 | Membrane receptor                      | Family A G protein-coupled receptor |
| Neurotrypsin inhibitor                           | P56730 | 114  | 1.000  | 1.000 | Enzyme                                 | Hydrolase                           |
| Neutral alpha-glucosidase AB inhibitor           | Q14697 | 4    | 0.9999 | 1.000 | Enzyme                                 | Hydrolase                           |
| Neutral amino acid transporter B(0) inhibitor    | Q15758 | 4    | 0.874  | 0.876 | Transporter                            | Electrochemical transporter         |
| Neutral cholesterol ester hydrolase 1 inhibitor  | Q6PIU2 | 27   | 0.9971 | 0.997 | Enzyme                                 | NA                                  |
| Neutrophil collagenase inhibitor                 | P22894 | 912  | 0.9937 | 0.994 | Enzyme                                 | Protease                            |
| Neutrophil elastase inhibitor                    | P08246 | 1494 | 0.9951 | 0.995 | Enzyme                                 | Protease                            |
| N-formyl peptide receptor 2 agonist              | P25090 | 465  | 0.9967 | 0.996 | Membrane receptor                      | Family A G protein-coupled receptor |
| N-formyl peptide receptor 2 antagonist           | P25090 | 14   | 0.9525 | 0.954 | Membrane receptor                      | Family A G protein-coupled receptor |
| N-glycosylase/DNA lyase inhibitor                | O15527 | 15   | 0.9692 | 0.97  | Enzyme                                 | NA                                  |
| Nicotinamide N-methyltransferase inhibitor       | P40261 | 57   | 0.9996 | 1.000 | Enzyme                                 | Transferase                         |
| Nicotinamide phosphoribosyltransferase inhibitor | P43490 | 816  | 0.9982 | 0.998 | Enzyme                                 | NA                                  |
| Nicotinate phosphoribosyltransferase inhibitor   | Q6XQN6 | 22   | 0.9942 | 0.994 | Enzyme                                 | Ligase                              |
| Nischarin inhibitor                              | Q9Y2I1 | 139  | 0.999  | 0.999 | Other cytosolic protein                | NA                                  |
| Nitric oxide synthase, brain inhibitor           | P29475 | 830  | 0.9987 | 0.999 | Enzyme                                 | NA                                  |
| Nitric oxide synthase, endothelial inhibitor     | P29474 | 335  | 0.998  | 0.998 | Enzyme                                 | NA                                  |
| Nitric oxide synthase, inducible inhibitor       | P35228 | 648  | 0.9957 | 0.996 | Enzyme                                 | NA                                  |
| N-lysine methyltransferase KMT5A inhibitor       | Q9NQR1 | 13   | 0.8561 | 0.859 | Epigenetic regulator                   | Writer                              |
| N-lysine methyltransferase SMYD2 inhibitor       | Q9NRG4 | 34   | 0.9929 | 0.993 | Epigenetic regulator                   | Writer                              |
| Nociceptin receptor agonist                      | P41146 | 213  | 0.9991 | 0.999 | Membrane receptor                      | Family A G protein-                 |

|                                                                          |        |      |        |       |                                               |                                     |
|--------------------------------------------------------------------------|--------|------|--------|-------|-----------------------------------------------|-------------------------------------|
|                                                                          |        |      |        |       |                                               | coupled receptor                    |
| Nociceptin receptor antagonist                                           | P41146 | 504  | 0.9949 | 0.995 | Membrane receptor                             | Family A G protein-coupled receptor |
| Non-lysosomal glucosylceramidase inhibitor                               | Q9HCG7 | 57   | 1.000  | 1.000 | Enzyme                                        | NA                                  |
| Non-receptor tyrosine-protein kinase TYK2 inhibitor                      | P29597 | 869  | 0.9896 | 0.99  | Enzyme                                        | Kinase                              |
| NPC1-like intracellular cholesterol transporter 1 inhibitor              | Q9UHC9 | 31   | 1.000  | 1.000 | Other membrane protein                        | NA                                  |
| NT-3 growth factor receptor agonist                                      | Q16288 | 11   | 1.000  | 1.000 | Enzyme                                        | Kinase                              |
| NT-3 growth factor receptor antagonist                                   | Q16288 | 88   | 0.9401 | 0.938 | Enzyme                                        | Kinase                              |
| N-terminal Xaa-Pro-Lys N-methyltransferase 1 inhibitor                   | Q9BV86 | 18   | 1.000  | 1.000 | Enzyme                                        | Transferase                         |
| NUAK family SNF1-like kinase 1 inhibitor                                 | O60285 | 37   | 0.9495 | 0.947 | Enzyme                                        | Kinase                              |
| Nuclear factor NF-kappa-B p100 subunit inhibitor                         | Q00653 | 165  | 0.9865 | 0.986 | Transcription factor; Other cytosolic protein | NA                                  |
| Nuclear factor NF-kappa-B p105 subunit inhibitor                         | P19838 | 38   | 0.994  | 0.994 | Transcription factor; Other cytosolic protein | NA                                  |
| Nuclear receptor corepressor 1 antagonist                                | O75376 | 60   | 0.9977 | 0.998 | Epigenetic regulator                          | Writer                              |
| Nuclear receptor corepressor 2 antagonist                                | Q9Y618 | 280  | 0.998  | 0.998 | Unclassified protein                          | NA                                  |
| Nuclear receptor ROR-alpha agonist                                       | P35398 | 64   | 0.9915 | 0.992 | Transcription factor                          | Nuclear receptor                    |
| Nuclear receptor ROR-alpha antagonist                                    | P35398 | 16   | 0.9996 | 1.000 | Transcription factor                          | Nuclear receptor                    |
| Nuclear receptor ROR-beta agonist                                        | Q92753 | 71   | 0.9944 | 0.994 | Transcription factor                          | Nuclear receptor                    |
| Nuclear receptor ROR-beta antagonist                                     | Q92753 | 14   | 0.998  | 0.998 | Transcription factor                          | Nuclear receptor                    |
| Nuclear receptor ROR-gamma agonist                                       | P51449 | 1163 | 0.9956 | 0.996 | Transcription factor                          | Nuclear receptor                    |
| Nuclear receptor ROR-gamma antagonist                                    | P51449 | 847  | 0.9928 | 0.993 | Transcription factor                          | Nuclear receptor                    |
| Nuclear receptor subfamily 1 group D member 1 agonist                    | P20393 | 68   | 1.000  | 1.000 | Transcription factor                          | Nuclear receptor                    |
| Nuclear receptor subfamily 1 group I member 2 agonist                    | O75469 | 95   | 0.9745 | 0.976 | Transcription factor                          | Nuclear receptor                    |
| Nuclear receptor subfamily 1 group I member 2 antagonist                 | O75469 | 62   | 0.8906 | 0.887 | Transcription factor                          | Nuclear receptor                    |
| Nuclear receptor subfamily 1 group I member 3 agonist                    | Q14994 | 101  | 0.9954 | 0.996 | Transcription factor                          | Nuclear receptor                    |
| Nuclear receptor subfamily 4 group A member 2 agonist                    | P43354 | 12   | 0.9995 | 1.000 | Transcription factor                          | Nuclear receptor                    |
| Nuclear receptor subfamily 5 group A member 2 agonist                    | O00482 | 40   | 1.000  | 1.000 | Transcription factor                          | Nuclear receptor                    |
| Nuclear receptor subfamily 5 group A member 2 antagonist                 | O00482 | 27   | 0.9982 | 0.998 | Transcription factor                          | Nuclear receptor                    |
| Nucleotide-binding oligomerization domain-containing protein 1 inhibitor | Q9Y239 | 44   | 0.9992 | 0.999 | Unclassified protein                          | NA                                  |
| Nucleotide-binding oligomerization domain-containing protein 2 inhibitor | Q9HC29 | 31   | 0.958  | 0.958 | Unclassified protein                          | NA                                  |
| Olfactory receptor 51E2 agonist                                          | Q9H255 | 21   | 0.9748 | 0.976 | Membrane receptor                             | Family A G protein-coupled receptor |
| Opioid growth factor receptor-like protein 1 agonist                     | Q5TC84 | 25   | 0.9999 | 1.000 | Membrane receptor                             | NA                                  |



|                                                             |        |      |        |       |                      |                                     |
|-------------------------------------------------------------|--------|------|--------|-------|----------------------|-------------------------------------|
| Opioid growth factor receptor-like protein 1 antagonist     | Q5TC84 | 357  | 0.9977 | 0.998 | Membrane receptor    | NA                                  |
| Orexin receptor type 1 agonist                              | O43613 | 61   | 0.9977 | 0.998 | Membrane receptor    | Family A G protein-coupled receptor |
| Orexin receptor type 1 antagonist                           | O43613 | 2440 | 0.9959 | 0.996 | Membrane receptor    | Family A G protein-coupled receptor |
| Orexin receptor type 2 agonist                              | O43614 | 75   | 0.9977 | 0.998 | Membrane receptor    | Family A G protein-coupled receptor |
| Orexin receptor type 2 antagonist                           | O43614 | 2636 | 0.996  | 0.996 | Membrane receptor    | Family A G protein-coupled receptor |
| Ornithine decarboxylase inhibitor                           | P11926 | 10   | 0.9996 | 1.000 | Enzyme               | Lyase                               |
| Oxidized purine nucleoside triphosphate hydrolase inhibitor | P36639 | 102  | 0.9945 | 0.995 | Enzyme               | Hydrolase                           |
| Oxoeicosanoid receptor 1 agonist                            | Q8TDS5 | 5    | 1.000  | 1.000 | Membrane receptor    | Family A G protein-coupled receptor |
| Oxoeicosanoid receptor 1 antagonist                         | Q8TDS5 | 43   | 1.000  | 1.000 | Membrane receptor    | Family A G protein-coupled receptor |
| Oxysterols receptor LXR-alpha agonist                       | Q13133 | 280  | 0.9933 | 0.993 | Transcription factor | Nuclear receptor                    |
| Oxysterols receptor LXR-alpha antagonist                    | Q13133 | 314  | 0.9961 | 0.996 | Transcription factor | Nuclear receptor                    |
| Oxysterols receptor LXR-beta agonist                        | P55055 | 448  | 0.9932 | 0.993 | Transcription factor | Nuclear receptor                    |
| Oxysterols receptor LXR-beta antagonist                     | P55055 | 345  | 0.9947 | 0.995 | Transcription factor | Nuclear receptor                    |
| Oxytocin receptor agonist                                   | P30559 | 220  | 0.9949 | 0.995 | Membrane receptor    | Family A G protein-coupled receptor |
| Oxytocin receptor antagonist                                | P30559 | 425  | 0.998  | 0.998 | Membrane receptor    | Family A G protein-coupled receptor |
| P2Y purinoceptor 1 agonist                                  | P47900 | 23   | 0.9997 | 1.000 | Membrane receptor    | Family A G protein-coupled receptor |
| P2Y purinoceptor 1 antagonist                               | P47900 | 114  | 0.9997 | 1.000 | Membrane receptor    | Family A G protein-coupled receptor |
| P2Y purinoceptor 11 agonist                                 | Q96G91 | 15   | 1.000  | 1.000 | Membrane receptor    | Family A G protein-coupled receptor |
| P2Y purinoceptor 12 antagonist                              | Q9H244 | 328  | 0.9987 | 0.999 | Membrane receptor    | Family A G protein-coupled receptor |
| P2Y purinoceptor 14 agonist                                 | Q15391 | 21   | 1.000  | 1.000 | Membrane receptor    | Family A G protein-coupled receptor |
| P2Y purinoceptor 14 antagonist                              | Q15391 | 8    | 1.000  | 1.000 | Membrane receptor    | Family A G protein-coupled receptor |
| P2Y purinoceptor 2 agonist                                  | P41231 | 181  | 0.9999 | 1.000 | Membrane receptor    | Family A G protein-coupled receptor |
| P2Y purinoceptor 2 antagonist                               | P41231 | 17   | 1.000  | 1.000 | Membrane receptor    | Family A G protein-coupled receptor |
| P2Y purinoceptor 4 agonist                                  | P51582 | 91   | 0.9999 | 1.000 | Membrane receptor    | Family A G protein-coupled receptor |

|                                                                             |        |      |        |       |                      |                                     |
|-----------------------------------------------------------------------------|--------|------|--------|-------|----------------------|-------------------------------------|
| P2Y purinoceptor 6 agonist                                                  | Q15077 | 107  | 0.9999 | 1.000 | Membrane receptor    | Family A G protein-coupled receptor |
| Palmitoleoyl-protein carboxylesterase NOTUM inhibitor                       | Q6P988 | 199  | 0.9994 | 0.999 | Enzyme               | Hydrolase                           |
| Pancreatic alpha-amylase inhibitor                                          | P04746 | 12   | 1.000  | 1.000 | Enzyme               | Hydrolase                           |
| Pancreatic triacylglycerol lipase inhibitor                                 | P16233 | 14   | 0.9828 | 0.984 | Enzyme               | Hydrolase                           |
| Pantothenate kinase 1 inhibitor                                             | Q8TE04 | 11   | 1.000  | 1.000 | Enzyme               | Transferase                         |
| Pantothenate kinase 3 inhibitor                                             | Q9H999 | 10   | 0.9217 | 0.921 | Enzyme               | Transferase                         |
| Parathyroid hormone/parathyroid hormone-related peptide receptor agonist    | Q03431 | 49   | 0.9998 | 1.000 | Membrane receptor    | Family B G protein-coupled receptor |
| Parathyroid hormone/parathyroid hormone-related peptide receptor antagonist | Q03431 | 25   | 0.9837 | 0.984 | Membrane receptor    | Family B G protein-coupled receptor |
| PC4 and SFRS1-interacting protein inhibitor                                 | O75475 | 3    | 1.000  | 1.000 | Epigenetic regulator | Reader                              |
| Pepsin A-5 inhibitor                                                        | P0DJ09 | 23   | 0.9926 | 0.993 | Enzyme               | Protease                            |
| Peptide deformylase, mitochondrial inhibitor                                | Q9HBH1 | 64   | 0.9999 | 1.000 | Enzyme               | Hydrolase                           |
| Peptidyl-glycine alpha-amidating monooxygenase inhibitor                    | P19021 | 9    | 0.9996 | 1.000 | Enzyme               | NA                                  |
| Peptidyl-prolyl cis-trans isomerase A inhibitor                             | P62937 | 180  | 0.9984 | 0.998 | Enzyme               | Isomerase                           |
| Peptidyl-prolyl cis-trans isomerase B inhibitor                             | P23284 | 21   | 1.000  | 1.000 | Enzyme               | Isomerase                           |
| Peptidyl-prolyl cis-trans isomerase D inhibitor                             | Q08752 | 13   | 0.9531 | 0.951 | Enzyme               | Isomerase                           |
| Peptidyl-prolyl cis-trans isomerase FKBP1A inhibitor                        | P62942 | 436  | 0.9999 | 1.000 | Enzyme               | Isomerase                           |
| Peptidyl-prolyl cis-trans isomerase FKBP1B inhibitor                        | P68106 | 6    | 0.8607 | 0.862 | Enzyme               | Isomerase                           |
| Peptidyl-prolyl cis-trans isomerase FKBP4 inhibitor                         | Q02790 | 16   | 0.9732 | 0.974 | Enzyme               | Isomerase                           |
| Peptidyl-prolyl cis-trans isomerase FKBP5 inhibitor                         | Q13451 | 71   | 0.9999 | 1.000 | Enzyme               | NA                                  |
| Peptidyl-prolyl cis-trans isomerase NIMA-interacting 1 inhibitor            | Q13526 | 176  | 0.9917 | 0.992 | Enzyme               | Isomerase                           |
| Peregrin inhibitor                                                          | P55201 | 156  | 0.9879 | 0.988 | Epigenetic regulator | Reader                              |
| Perforin-1 inhibitor                                                        | P14222 | 211  | 1.000  | 1.000 | Ion channel          | Other ion channel                   |
| Peripheral plasma membrane protein CASK inhibitor                           | O14936 | 3    | 0.983  | 0.983 | Enzyme               | NA                                  |
| Peroxisomal membrane protein PEX14 inhibitor                                | O75381 | 8    | 1.000  | 1.000 | Unclassified protein | NA                                  |
| Peroxisomal N(1)-acetyl-spermine/spermidine oxidase inhibitor               | Q6QHF9 | 9    | 1.000  | 1.000 | Enzyme               | NA                                  |
| Peroxisome proliferator-activated receptor alpha agonist                    | Q07869 | 1326 | 0.9966 | 0.997 | Transcription factor | Nuclear receptor                    |
| Peroxisome proliferator-activated receptor alpha antagonist                 | Q07869 | 659  | 0.9985 | 0.999 | Transcription factor | Nuclear receptor                    |
| Peroxisome proliferator-activated receptor delta agonist                    | Q03181 | 882  | 0.9978 | 0.998 | Transcription factor | Nuclear receptor                    |
| Peroxisome proliferator-activated receptor delta antagonist                 | Q03181 | 250  | 0.9907 | 0.991 | Transcription factor | Nuclear receptor                    |
| Peroxisome proliferator-activated receptor gamma agonist                    | P37231 | 1703 | 0.9935 | 0.994 | Transcription factor | Nuclear receptor                    |
| Peroxisome proliferator-activated receptor gamma antagonist                 | P37231 | 1238 | 0.9909 | 0.991 | Transcription factor | Nuclear receptor                    |

|                                                                                          |        |      |        |       |                      |             |
|------------------------------------------------------------------------------------------|--------|------|--------|-------|----------------------|-------------|
| PH and SEC7 domain-containing protein 1 inhibitor                                        | A5PKW4 | 112  | 0.9785 | 0.979 | Unclassified protein | NA          |
| PH domain leucine-rich repeat-containing protein phosphatase 2 inhibitor                 | Q6ZVD8 | 12   | 0.9521 | 0.952 | Enzyme               | Phosphatase |
| Phenylalanine--tRNA ligase, mitochondrial inhibitor                                      | O95363 | 3    | 1.000  | 1.000 | Enzyme               | Ligase      |
| Phenylethanolamine N-methyltransferase inhibitor                                         | P11086 | 110  | 0.9996 | 1.000 | Enzyme               | Transferase |
| Phosphatidylcholine transfer protein inhibitor                                           | Q9UKL6 | 11   | 1.000  | 1.000 | Unclassified protein | NA          |
| Phosphatidylcholine:ceramide cholinephosphotransferase 1 inhibitor                       | Q86VZ5 | 16   | 0.9995 | 0.999 | Enzyme               | Transferase |
| Phosphatidylcholine:ceramide cholinephosphotransferase 2 inhibitor                       | Q8NHU3 | 82   | 0.9996 | 0.999 | Enzyme               | Transferase |
| Phosphatidylinositol 3,4,5-trisphosphate 5-phosphatase 2 inhibitor                       | O15357 | 11   | 0.9959 | 0.996 | Enzyme               | NA          |
| Phosphatidylinositol 3-kinase catalytic subunit type 3 inhibitor                         | Q8NEB9 | 75   | 0.9464 | 0.948 | Enzyme               | Transferase |
| Phosphatidylinositol 3-kinase regulatory subunit alpha inhibitor                         | P27986 | 1052 | 0.9931 | 0.993 | Enzyme               | NA          |
| Phosphatidylinositol 3-kinase regulatory subunit beta inhibitor                          | O00459 | 377  | 0.9979 | 0.998 | Enzyme               | NA          |
| Phosphatidylinositol 4,5-bisphosphate 3-kinase catalytic subunit alpha isoform inhibitor | P42336 | 6064 | 0.9907 | 0.991 | Enzyme               | Transferase |
| Phosphatidylinositol 4,5-bisphosphate 3-kinase catalytic subunit beta isoform inhibitor  | P42338 | 1632 | 0.989  | 0.989 | Enzyme               | Transferase |
| Phosphatidylinositol 4,5-bisphosphate 3-kinase catalytic subunit delta isoform inhibitor | O00329 | 2351 | 0.989  | 0.989 | Enzyme               | Transferase |
| Phosphatidylinositol 4,5-bisphosphate 3-kinase catalytic subunit gamma isoform inhibitor | P48736 | 2505 | 0.9812 | 0.981 | Enzyme               | Transferase |
| Phosphatidylinositol 4-kinase alpha inhibitor                                            | P42356 | 84   | 0.9981 | 0.998 | Enzyme               | Transferase |
| Phosphatidylinositol 4-kinase beta inhibitor                                             | Q9UBF8 | 247  | 0.9857 | 0.985 | Enzyme               | Transferase |
| Phosphatidylinositol 4-phosphate 3-kinase C2 domain-containing subunit alpha inhibitor   | O00443 | 15   | 0.9418 | 0.943 | Enzyme               | Transferase |
| Phosphatidylinositol 4-phosphate 3-kinase C2 domain-containing subunit beta inhibitor    | O00750 | 45   | 0.9611 | 0.961 | Enzyme               | Transferase |
| Phosphatidylinositol 4-phosphate 3-kinase C2 domain-containing subunit gamma inhibitor   | O75747 | 7    | 0.8979 | 0.902 | Enzyme               | Transferase |
| Phosphatidylinositol 4-phosphate 5-kinase type-1 gamma inhibitor                         | O60331 | 6    | 0.9546 | 0.959 | Enzyme               | Transferase |
| Phosphatidylinositol 5-phosphate 4-kinase type-2 alpha inhibitor                         | P48426 | 32   | 0.9727 | 0.973 | Enzyme               | Transferase |
| Phosphatidylinositol 5-phosphate 4-kinase type-2 beta inhibitor                          | P78356 | 13   | 0.9904 | 0.991 | Enzyme               | Kinase      |
| Phosphatidylinositol 5-phosphate 4-kinase type-2 gamma inhibitor                         | Q8TBX8 | 51   | 0.9873 | 0.987 | Enzyme               | Transferase |
| Phosphatidylserine lipase ABHD16A inhibitor                                              | O95870 | 6    | 0.9854 | 0.986 | Enzyme               | Hydrolase   |
| Phosphoenolpyruvate carboxykinase, cytosolic [GTP] inhibitor                             | P35558 | 21   | 1.000  | 1.000 | Enzyme               | Lyase       |
| Phosphoethanolamine/phosphocholine phosphatase inhibitor                                 | Q8TCT1 | 53   | 0.9985 | 0.999 | Enzyme               | Phosphatase |
| Phosphoglycerate kinase 1 inhibitor                                                      | P00558 | 104  | 1.000  | 1.000 | Enzyme               | Transferase |
| Phosphoglycerate mutase 1 inhibitor                                                      | P18669 | 22   | 0.9982 | 0.998 | Enzyme               | NA          |
| Phospholipase A and acyltransferase 2 inhibitor                                          | Q9NWW9 | 33   | 1.000  | 1.000 | Enzyme               | Transferase |
| Phospholipase A and acyltransferase 3 inhibitor                                          | P53816 | 33   | 1.000  | 1.000 | Enzyme               | Hydrolase   |
| Phospholipase A and acyltransferase 4 inhibitor                                          | Q9UL19 | 35   | 1.000  | 1.000 | Enzyme               | Transferase |

|                                                                                    |        |      |        |       |                      |                                     |
|------------------------------------------------------------------------------------|--------|------|--------|-------|----------------------|-------------------------------------|
| Phospholipase A and acyltransferase 5 inhibitor                                    | Q96KN8 | 35   | 1.000  | 1.000 | Enzyme               | Transferase                         |
| Phospholipase A2 group V inhibitor                                                 | P39877 | 35   | 0.9998 | 1.000 | Enzyme               | Hydrolase                           |
| Phospholipase A2 inhibitor                                                         | P04054 | 257  | 0.9148 | 0.914 | Enzyme               | Hydrolase                           |
| Phospholipase A2, membrane associated inhibitor                                    | P14555 | 313  | 0.9987 | 0.999 | Enzyme               | Hydrolase                           |
| Phospholipase A-2-activating protein inhibitor                                     | Q9Y263 | 17   | 0.9997 | 1.000 | Unclassified protein | NA                                  |
| Phospholipase D1 inhibitor                                                         | Q13393 | 130  | 0.9947 | 0.995 | Enzyme               | Hydrolase                           |
| Phospholipase D2 inhibitor                                                         | O14939 | 113  | 0.9948 | 0.995 | Enzyme               | Hydrolase                           |
| Phosphomannomutase 2 inhibitor                                                     | O15305 | 13   | 0.996  | 0.996 | Enzyme               | Isomerase                           |
| Phosphorylase b kinase gamma catalytic chain, liver/testis isoform inhibitor       | P15735 | 9    | 0.9595 | 0.962 | Enzyme               | Kinase                              |
| Phosphorylase b kinase regulatory subunit alpha, skeletal muscle isoform inhibitor | P46020 | 3    | 0.9992 | 0.999 | Enzyme               | Kinase                              |
| Photoreceptor-specific nuclear receptor agonist                                    | Q9Y5X4 | 17   | 1.000  | 1.000 | Transcription factor | Nuclear receptor                    |
| Pituitary adenylate cyclase-activating polypeptide type I receptor agonist         | P41586 | 44   | 1.000  | 1.000 | Unclassified protein | NA                                  |
| Placenta growth factor inhibitor                                                   | P49763 | 16   | 1.000  | 1.000 | Secreted protein     | NA                                  |
| Plasma kallikrein inhibitor                                                        | P03952 | 833  | 0.9935 | 0.994 | Enzyme               | Protease                            |
| Plasminogen activator inhibitor 1 inhibitor                                        | P05121 | 185  | 0.9983 | 0.998 | Secreted protein     | NA                                  |
| Plasminogen inhibitor                                                              | P00747 | 749  | 0.9902 | 0.99  | Enzyme               | Protease                            |
| Platelet-activating factor acetylhydrolase IB subunit alpha2 inhibitor             | P68402 | 4    | 0.959  | 0.959 | Enzyme               | NA                                  |
| Platelet-activating factor acetylhydrolase IB subunit beta inhibitor               | P68402 | 8    | 0.9714 | 0.971 | Enzyme               | NA                                  |
| Platelet-activating factor acetylhydrolase inhibitor                               | Q13093 | 444  | 0.9961 | 0.996 | Enzyme               | Hydrolase                           |
| Platelet-activating factor receptor antagonist                                     | P25105 | 310  | 0.9941 | 0.994 | Membrane receptor    | Family A G protein-coupled receptor |
| Platelet-derived growth factor receptor alpha antagonist                           | P16234 | 787  | 0.9775 | 0.977 | Enzyme               | Kinase                              |
| Platelet-derived growth factor receptor beta antagonist                            | P09619 | 1147 | 0.9776 | 0.978 | Enzyme               | Kinase                              |
| Poly [ADP-ribose] polymerase 1 inhibitor                                           | P09874 | 3101 | 0.9951 | 0.995 | Enzyme               | Transferase                         |
| Poly [ADP-ribose] polymerase 2 inhibitor                                           | Q9UGN5 | 241  | 0.9968 | 0.997 | Enzyme               | Transferase                         |
| Poly [ADP-ribose] polymerase tankyrase-1 inhibitor                                 | O95271 | 733  | 0.9939 | 0.994 | Enzyme               | Transferase                         |
| Poly [ADP-ribose] polymerase tankyrase-2 inhibitor                                 | Q9H2K2 | 586  | 0.9949 | 0.995 | Enzyme               | Transferase                         |
| Poly(ADP-ribose) glycohydrolase activator                                          | Q86W56 | 41   | 1.000  | 1.000 | Enzyme               | NA                                  |
| Poly(ADP-ribose) glycohydrolase inhibitor                                          | Q86W56 | 95   | 0.9812 | 0.981 | Enzyme               | NA                                  |
| Polyamine deacetylase HDAC10 inhibitor                                             | Q969S8 | 260  | 0.9972 | 0.997 | Epigenetic regulator | Eraser                              |
| Polycomb protein EED inhibitor                                                     | O75530 | 203  | 0.9968 | 0.994 | Unclassified protein | NA                                  |
| Polypeptide N-acetylgalactosaminyltransferase 2 inhibitor                          | Q10471 | 3    | 0.9998 | 1.000 | Enzyme               | Transferase                         |
| Polyunsaturated fatty acid 5-lipoxygenase inhibitor                                | P09917 | 1621 | 0.9831 | 0.983 | Enzyme               | Oxidoreductase                      |

|                                                                                        |        |      |        |       |                     |                                          |
|----------------------------------------------------------------------------------------|--------|------|--------|-------|---------------------|------------------------------------------|
| Polyunsaturated fatty acid lipooxygenase ALOX12 inhibitor                              | P18054 | 714  | 0.9039 | 0.903 | Enzyme              | NA                                       |
| Polyunsaturated fatty acid lipooxygenase ALOX15 inhibitor                              | P16050 | 1855 | 0.8783 | 0.878 | Enzyme              | Oxidoreductase                           |
| Polyunsaturated fatty acid lipooxygenase ALOX15B inhibitor                             | O15296 | 6    | 0.9276 | 0.929 | Enzyme              | Oxidoreductase                           |
| Potassium channel subfamily K member 2 blocker                                         | O95069 | 19   | 0.8565 | 0.846 | Ion channel         | Voltage-gated ion channel                |
| Potassium channel subfamily K member 3 blocker                                         | O14649 | 476  | 0.9959 | 0.996 | Ion channel         | Voltage-gated ion channel                |
| Potassium channel subfamily K member 9 blocker                                         | Q9NPC2 | 42   | 0.9582 | 0.958 | Ion channel         | Voltage-gated ion channel                |
| Potassium voltage-gated channel subfamily A member 1 blocker                           | Q09470 | 53   | 0.9843 | 0.985 | Ion channel         | Voltage-gated ion channel                |
| Potassium voltage-gated channel subfamily A member 2 blocker                           | P16389 | 5    | 0.9713 | 0.972 | Ion channel         | Voltage-gated ion channel                |
| Potassium voltage-gated channel subfamily A member 3 blocker                           | P22001 | 383  | 0.9959 | 0.996 | Ion channel         | Voltage-gated ion channel                |
| Potassium voltage-gated channel subfamily A member 4 blocker                           | P22459 | 10   | 0.9999 | 1.000 | Ion channel         | Voltage-gated ion channel                |
| Potassium voltage-gated channel subfamily A member 5 blocker                           | P22460 | 674  | 0.9954 | 0.995 | Ion channel         | Voltage-gated ion channel                |
| Potassium voltage-gated channel subfamily A member 6 blocker                           | P17658 | 5    | 0.9154 | 0.917 | Ion channel         | Voltage-gated ion channel                |
| Potassium voltage-gated channel subfamily H member 1 blocker                           | O95259 | 5    | 1.000  | 1.000 | Ion channel         | Voltage-gated ion channel                |
| Potassium voltage-gated channel subfamily H member 2 blocker                           | Q12809 | 5483 | 0.9399 | 0.94  | Ion channel         | Voltage-gated ion channel                |
| Potassium voltage-gated channel subfamily H member 3 blocker                           | Q9ULD8 | 67   | 1.000  | 1.000 | Ion channel         | Voltage-gated ion channel                |
| Potassium voltage-gated channel subfamily KQT member 1 blocker                         | P51787 | 50   | 0.9777 | 0.978 | Ion channel         | Voltage-gated ion channel                |
| Potassium voltage-gated channel subfamily KQT member 2 blocker                         | O43526 | 210  | 0.9984 | 0.998 | Ion channel         | Voltage-gated ion channel                |
| Potassium voltage-gated channel subfamily KQT member 4 blocker                         | P56696 | 14   | 0.981  | 0.983 | Ion channel         | Voltage-gated ion channel                |
| Potassium voltage-gated channel subfamily KQT member 5 blocker                         | Q9NR82 | 15   | 0.9909 | 0.992 | Ion channel         | Voltage-gated ion channel                |
| Potassium/sodium hyperpolarization-activated cyclic nucleotide-gated channel 1 blocker | O60741 | 17   | 0.9916 | 0.992 | Ion channel         | Voltage-gated ion channel                |
| Potassium/sodium hyperpolarization-activated cyclic nucleotide-gated channel 4 blocker | Q9Y3Q4 | 19   | 0.9917 | 0.992 | Ion channel         | Voltage-gated ion channel                |
| Potassium-transporting ATPase alpha chain 1 inhibitor                                  | P20648 | 184  | 0.9987 | 0.996 | Transporter; Enzyme | Primary active transporter;<br>Hydrolase |

|                                                                |        |      |        |       |                       |                                          |
|----------------------------------------------------------------|--------|------|--------|-------|-----------------------|------------------------------------------|
| Potassium-transporting ATPase alpha chain 2 inhibitor          | P54707 | 10   | 1.000  | 1.000 | Transporter; Enzyme   | Primary active transporter;<br>Hydrolase |
| Presenilin-1 inhibitor                                         | P49768 | 87   | 0.9995 | 1.000 | Ion channel           | Other ion channel                        |
| Presenilin-2 inhibitor                                         | P49810 | 7    | 1.000  | 1.000 | Ion channel           | Other ion channel                        |
| Probable global transcription activator SNF2L2 inhibitor       | P51531 | 15   | 0.9413 | 0.939 | Epigenetic regulator  | Reader                                   |
| Probable G-protein coupled receptor 139 agonist                | Q6DWJ6 | 22   | 0.9986 | 0.999 | Membrane receptor     | Family A G protein-coupled receptor      |
| Probable G-protein coupled receptor 142 agonist                | Q7Z601 | 146  | 1.000  | 1.000 | Membrane receptor     | Family A G protein-coupled receptor      |
| Probable G-protein coupled receptor 174 agonist                | Q9BXC1 | 13   | 1.000  | 1.000 | Membrane receptor     | Family A G protein-coupled receptor      |
| Probable G-protein coupled receptor 34 agonist                 | Q9UPC5 | 16   | 1.000  | 1.000 | Membrane receptor     | Family A G protein-coupled receptor      |
| Probable G-protein coupled receptor 88 agonist                 | Q9GZN0 | 135  | 1.000  | 1.000 | Membrane receptor     | Family A G protein-coupled receptor      |
| Probable G-protein coupled receptor 88 antagonist              | Q9GZN0 | 70   | 1.000  | 1.000 | Membrane receptor     | Family A G protein-coupled receptor      |
| Probable maltase-glucoamylase 2 inhibitor                      | Q2M2H8 | 346  | 0.993  | 0.993 | Unclassified protein  | NA                                       |
| Probable ubiquitin carboxyl-terminal hydrolase FAF-X inhibitor | Q93008 | 10   | 1.000  | 1.000 | Enzyme                | Protease                                 |
| Pro-cathepsin H inhibitor                                      | P09668 | 26   | 0.9679 | 0.948 | Enzyme                | Protease                                 |
| Procathepsin L inhibitor                                       | P07711 | 1414 | 0.9925 | 0.993 | Enzyme                | Protease                                 |
| Progesterone receptor agonist                                  | P06401 | 338  | 0.9995 | 1.000 | Transcription factor  | Nuclear receptor                         |
| Progesterone receptor antagonist                               | P06401 | 1444 | 0.9955 | 0.995 | Transcription factor  | Nuclear receptor                         |
| Programmed cell death 1 ligand 1 inhibitor                     | Q9NZQ7 | 15   | 0.9425 | 0.943 | Unclassified protein  | NA                                       |
| Programmed cell death protein 1 inhibitor                      | Q15116 | 73   | 0.9985 | 0.999 | Surface antigen       | NA                                       |
| Programmed cell death protein 4 inhibitor                      | Q53EL6 | 7    | 0.9892 | 0.989 | Unclassified protein  | NA                                       |
| Prokineticin receptor 1 antagonist                             | Q8TCW9 | 177  | 0.9969 | 0.996 | Membrane receptor     | Family A G protein-coupled receptor      |
| Prolactin-releasing peptide receptor antagonist                | P49683 | 95   | 0.9896 | 0.99  | Membrane receptor     | Family A G protein-coupled receptor      |
| Proliferating cell nuclear antigen inhibitor                   | P12004 | 20   | 1.000  | 1.000 | Other nuclear protein | NA                                       |
| Proline-rich AKT1 substrate 1 inhibitor                        | Q96B36 | 3    | 0.9999 | 1.000 | Unclassified protein  | NA                                       |
| Prolyl 3-hydroxylase OGFOD1 inhibitor                          | Q8N543 | 5    | 0.9994 | 1.000 | Enzyme                | Oxidoreductase                           |
| Prolyl 4-hydroxylase subunit alpha-1 inhibitor                 | P13674 | 3    | 1.000  | 1.000 | Enzyme                | Oxidoreductase                           |
| Prolyl endopeptidase FAP inhibitor                             | Q12884 | 168  | 0.9995 | 1.000 | Enzyme                | Protease                                 |
| Prolyl endopeptidase inhibitor                                 | P48147 | 296  | 0.9965 | 0.997 | Enzyme                | Protease                                 |

|                                                         |        |      |        |       |                   |                                     |
|---------------------------------------------------------|--------|------|--------|-------|-------------------|-------------------------------------|
| Prolyl hydroxylase EGLN2 inhibitor                      | Q96KS0 | 149  | 0.999  | 0.999 | Enzyme            | Oxidoreductase                      |
| Prolyl hydroxylase EGLN3 inhibitor                      | Q9H6Z9 | 108  | 0.9992 | 0.999 | Enzyme            | Oxidoreductase                      |
| Proprotein convertase subtilisin/kexin type 4 inhibitor | Q6UW60 | 6    | 1.000  | 1.000 | Enzyme            | Protease                            |
| Proprotein convertase subtilisin/kexin type 5 inhibitor | Q92824 | 18   | 0.9999 | 1.000 | Enzyme            | Protease                            |
| Proprotein convertase subtilisin/kexin type 6 inhibitor | P29122 | 121  | 0.9999 | 1.000 | Enzyme            | Protease                            |
| Proprotein convertase subtilisin/kexin type 7 inhibitor | Q16549 | 20   | 0.9756 | 0.975 | Enzyme            | Protease                            |
| Proprotein convertase subtilisin/kexin type 9 inhibitor | Q8NBP7 | 41   | 0.9584 | 0.959 | Enzyme            | Protease                            |
| Prostacyclin receptor agonist                           | P43119 | 147  | 0.9999 | 1.000 | Membrane receptor | Family A G protein-coupled receptor |
| Prostacyclin receptor antagonist                        | P43119 | 129  | 0.9862 | 0.986 | Membrane receptor | Family A G protein-coupled receptor |
| Prostacyclin synthase inhibitor                         | Q16647 | 16   | 1.000  | 1.000 | Enzyme            | Cytochrome P450                     |
| Prostaglandin D2 receptor 2 antagonist                  | Q9Y5Y4 | 1970 | 0.9992 | 0.999 | Membrane receptor | Family A G protein-coupled receptor |
| Prostaglandin D2 receptor agonist                       | Q13258 | 46   | 0.991  | 0.991 | Membrane receptor | Family A G protein-coupled receptor |
| Prostaglandin D2 receptor antagonist                    | Q13258 | 365  | 0.9975 | 0.997 | Membrane receptor | Family A G protein-coupled receptor |
| Prostaglandin E synthase 2 inhibitor                    | Q9H7Z7 | 28   | 0.9938 | 0.994 | Enzyme            | NA                                  |
| Prostaglandin E synthase inhibitor                      | O14684 | 1290 | 0.9875 | 0.988 | Enzyme            | Isomerase                           |
| Prostaglandin E2 receptor EP1 subtype agonist           | P34995 | 17   | 0.9942 | 0.995 | Membrane receptor | Family A G protein-coupled receptor |
| Prostaglandin E2 receptor EP1 subtype antagonist        | P34995 | 405  | 0.9991 | 0.999 | Membrane receptor | Family A G protein-coupled receptor |
| Prostaglandin E2 receptor EP2 subtype agonist           | P43116 | 232  | 0.9987 | 0.999 | Membrane receptor | Family A G protein-coupled receptor |
| Prostaglandin E2 receptor EP2 subtype antagonist        | P43116 | 181  | 0.9942 | 0.993 | Membrane receptor | Family A G protein-coupled receptor |
| Prostaglandin E2 receptor EP3 subtype agonist           | P43115 | 64   | 0.9999 | 1.000 | Membrane receptor | Family A G protein-coupled receptor |
| Prostaglandin E2 receptor EP3 subtype antagonist        | P43115 | 262  | 0.9951 | 0.995 | Membrane receptor | Family A G protein-coupled receptor |
| Prostaglandin E2 receptor EP4 subtype agonist           | P35408 | 92   | 0.9999 | 1.000 | Membrane receptor | Family A G protein-coupled receptor |
| Prostaglandin E2 receptor EP4 subtype antagonist        | P35408 | 469  | 0.9976 | 0.998 | Membrane receptor | Family A G protein-coupled receptor |
| Prostaglandin F2-alpha receptor agonist                 | P43088 | 21   | 1.000  | 1.000 | Membrane receptor | Family A G protein-coupled receptor |
| Prostaglandin F2-alpha receptor antagonist              | P43088 | 35   | 0.9857 | 0.986 | Membrane receptor | Family A G protein-coupled receptor |

|                                                    |        |      |        |       |                      |                |
|----------------------------------------------------|--------|------|--------|-------|----------------------|----------------|
| Prostaglandin G/H synthase 1 inhibitor             | P23219 | 863  | 0.9833 | 0.983 | Enzyme               | Oxidoreductase |
| Prostaglandin G/H synthase 2 inhibitor             | P35354 | 2868 | 0.9809 | 0.981 | Enzyme               | Oxidoreductase |
| Prostasin inhibitor                                | Q16651 | 21   | 1.000  | 1.000 | Enzyme               | Protease       |
| Prostate-specific antigen inhibitor                | P07288 | 44   | 0.9821 | 0.982 | Enzyme               | Protease       |
| Prostatic acid phosphatase inhibitor               | P15309 | 9    | 1.000  | 1.000 | Enzyme               | Phosphatase    |
| Proteasome subunit beta type-1 inhibitor           | P20618 | 109  | 0.9868 | 0.987 | Enzyme               | Protease       |
| Proteasome subunit beta type-10 inhibitor          | P40306 | 65   | 0.999  | 0.999 | Enzyme               | Protease       |
| Proteasome subunit beta type-2 inhibitor           | P49721 | 167  | 0.9875 | 0.988 | Enzyme               | Protease       |
| Proteasome subunit beta type-5 inhibitor           | P28074 | 658  | 0.9913 | 0.991 | Enzyme               | Protease       |
| Proteasome subunit beta type-8 inhibitor           | P28062 | 240  | 0.9986 | 0.999 | Enzyme               | Protease       |
| Proteasome subunit beta type-9 inhibitor           | P28065 | 81   | 0.9997 | 1.000 | Enzyme               | Protease       |
| Protein ABHD11 inhibitor                           | Q8NFV4 | 3    | 1.000  | 1.000 | Enzyme               | Hydrolase      |
| Protein arginine N-methyltransferase 1 inhibitor   | Q99873 | 66   | 0.9723 | 0.973 | Epigenetic regulator | Writer         |
| Protein arginine N-methyltransferase 3 inhibitor   | O60678 | 63   | 0.9957 | 0.996 | Epigenetic regulator | Writer         |
| Protein arginine N-methyltransferase 5 inhibitor   | O14744 | 585  | 0.9958 | 0.996 | Epigenetic regulator | Writer         |
| Protein arginine N-methyltransferase 6 inhibitor   | Q96LA8 | 95   | 0.9999 | 1.000 | Epigenetic regulator | Writer         |
| Protein arginine N-methyltransferase 8 inhibitor   | Q9NR22 | 34   | 0.9997 | 1.000 | Epigenetic regulator | Writer         |
| Protein cereblon inhibitor                         | Q96SW2 | 9    | 1.000  | 1.000 | Unclassified protein | NA             |
| Protein DBF4 homolog A inhibitor                   | Q9UBU7 | 190  | 0.9974 | 0.997 | Enzyme               | Kinase         |
| Protein delta homolog 1 inhibitor                  | P80370 | 10   | 0.8897 | 0.892 | Unclassified protein | NA             |
| Protein disulfide-isomerase inhibitor              | P07237 | 52   | 0.9996 | 1.000 | Enzyme               | Isomerase      |
| Protein ENL inhibitor                              | Q03111 | 5    | 0.8869 | 0.891 | Unclassified protein | NA             |
| Protein farnesyltransferase subunit beta inhibitor | P49356 | 1555 | 0.9903 | 0.99  | Enzyme               | Transferase    |
| Protein kinase C alpha type inhibitor              | P17252 | 684  | 0.9803 | 0.98  | Enzyme               | Kinase         |
| Protein kinase C beta type inhibitor               | P05771 | 526  | 0.9853 | 0.985 | Enzyme               | Kinase         |
| Protein kinase C delta type inhibitor              | Q05655 | 488  | 0.992  | 0.992 | Enzyme               | Kinase         |
| Protein kinase C epsilon type inhibitor            | Q02156 | 260  | 0.9743 | 0.974 | Enzyme               | Kinase         |
| Protein kinase C eta type inhibitor                | P24723 | 161  | 0.9892 | 0.989 | Enzyme               | Kinase         |
| Protein kinase C gamma type inhibitor              | P05129 | 116  | 0.9807 | 0.981 | Enzyme               | Kinase         |
| Protein kinase C iota type inhibitor               | P41743 | 517  | 0.9974 | 0.997 | Enzyme               | Kinase         |
| Protein kinase C theta type inhibitor              | Q04759 | 728  | 0.9936 | 0.992 | Enzyme               | Kinase         |
| Protein kinase C zeta type inhibitor               | Q05513 | 153  | 0.9901 | 0.989 | Enzyme               | Kinase         |



|                                                                            |        |     |        |       |                         |                                     |
|----------------------------------------------------------------------------|--------|-----|--------|-------|-------------------------|-------------------------------------|
| Protein max inhibitor                                                      | P61244 | 6   | 0.8577 | 0.845 | Transcription factor    | NA                                  |
| Protein Mdm4 inhibitor                                                     | O15151 | 161 | 0.9983 | 0.998 | Unclassified protein    | NA                                  |
| Protein mono-ADP-ribosyltransferase PARP10 inhibitor                       | Q53GL7 | 85  | 0.9884 | 0.988 | Enzyme                  | Transferase                         |
| Protein mono-ADP-ribosyltransferase PARP11 inhibitor                       | Q9NR21 | 12  | 0.9814 | 0.982 | Enzyme                  | Transferase                         |
| Protein mono-ADP-ribosyltransferase PARP12 inhibitor                       | Q9H0J9 | 4   | 0.9837 | 0.984 | Enzyme                  | Transferase                         |
| Protein mono-ADP-ribosyltransferase PARP14 inhibitor                       | Q460N5 | 41  | 0.9832 | 0.984 | Enzyme                  | Transferase                         |
| Protein mono-ADP-ribosyltransferase PARP15 inhibitor                       | Q460N3 | 8   | 0.9873 | 0.988 | Enzyme                  | Transferase                         |
| Protein mono-ADP-ribosyltransferase PARP16 inhibitor                       | Q8N5Y8 | 5   | 0.935  | 0.937 | Enzyme                  | Transferase                         |
| Protein mono-ADP-ribosyltransferase PARP3 inhibitor                        | Q9Y6F1 | 88  | 0.9983 | 0.998 | Enzyme                  | Transferase                         |
| Protein mono-ADP-ribosyltransferase PARP4 inhibitor                        | Q9UKK3 | 11  | 0.9927 | 0.993 | Enzyme                  | Transferase                         |
| Protein mono-ADP-ribosyltransferase PARP6 inhibitor                        | Q2NL67 | 3   | 0.9991 | 0.999 | Enzyme                  | Transferase                         |
| Protein O-GlcNAcase inhibitor                                              | O60502 | 168 | 0.9999 | 1.000 | Enzyme                  | NA                                  |
| Protein phosphatase 1A inhibitor                                           | P35813 | 3   | 0.893  | 0.895 | Enzyme                  | Phosphatase                         |
| Protein phosphatase 1B inhibitor                                           | O75688 | 11  | 0.9988 | 0.999 | Enzyme                  | Phosphatase                         |
| Protein phosphatase 3 catalytic subunit alpha inhibitor                    | Q08209 | 11  | 1.000  | 1.000 | Enzyme                  | Phosphatase                         |
| Protein phosphatase methylesterase 1 inhibitor                             | Q9Y570 | 10  | 0.9838 | 0.984 | Enzyme                  | Hydrolase                           |
| Protein S100-A10 inhibitor                                                 | P60903 | 30  | 0.9485 | 0.949 | Unclassified protein    | NA                                  |
| Protein S100-A4 inhibitor                                                  | P26447 | 17  | 0.9991 | 0.999 | Unclassified protein    | NA                                  |
| Protein S100-A9 inhibitor                                                  | P06702 | 50  | 1.000  | 1.000 | Unclassified protein    | NA                                  |
| Protein S100-B inhibitor                                                   | P04271 | 3   | 0.9932 | 0.993 | Other cytosolic protein | NA                                  |
| Protein tyrosine phosphatase receptor type C-associated protein antagonist | Q14761 | 4   | 0.956  | 0.957 | Enzyme                  | NA                                  |
| Protein tyrosine phosphatase type IVA 1 inhibitor                          | Q93096 | 4   | 0.8905 | 0.873 | Enzyme                  | Phosphatase                         |
| Protein tyrosine phosphatase type IVA 2 inhibitor                          | Q12974 | 4   | 0.8905 | 0.873 | Enzyme                  | NA                                  |
| Protein tyrosine phosphatase type IVA 3 inhibitor                          | O75365 | 20  | 0.9773 | 0.978 | Enzyme                  | Phosphatase                         |
| Protein Wnt-3a inhibitor                                                   | P56704 | 38  | 0.9831 | 0.982 | Secreted protein        | NA                                  |
| Protein-arginine deiminase type-1 inhibitor                                | Q9ULC6 | 8   | 1.000  | 1.000 | Enzyme                  | Hydrolase                           |
| Protein-arginine deiminase type-2 inhibitor                                | Q9Y2J8 | 11  | 1.000  | 1.000 | Enzyme                  | Hydrolase                           |
| Protein-arginine deiminase type-3 inhibitor                                | Q9ULW8 | 16  | 0.9999 | 1.000 | Enzyme                  | Hydrolase                           |
| Protein-arginine deiminase type-4 inhibitor                                | Q9UM07 | 19  | 0.9999 | 1.000 | Enzyme                  | NA                                  |
| Protein-arginine deiminase type-6 inhibitor                                | Q6TGC4 | 6   | 1.000  | 1.000 | Enzyme                  | Hydrolase                           |
| Proteinase-activated receptor 1 agonist                                    | P25116 | 76  | 0.9998 | 1.000 | Membrane receptor       | Family A G protein-coupled receptor |
| Proteinase-activated receptor 1 antagonist                                 | P25116 | 544 | 0.9964 | 0.996 | Membrane receptor       | Family A G protein-                 |

|                                                                  |        |      |        |       |                      |                                     |
|------------------------------------------------------------------|--------|------|--------|-------|----------------------|-------------------------------------|
|                                                                  |        |      |        |       |                      | coupled receptor                    |
| Proteinase-activated receptor 2 agonist                          | P55085 | 151  | 0.9997 | 1.000 | Membrane receptor    | Family A G protein-coupled receptor |
| Proteinase-activated receptor 2 antagonist                       | P55085 | 28   | 0.9327 | 0.932 | Membrane receptor    | Family A G protein-coupled receptor |
| Proteinase-activated receptor 4 antagonist                       | Q96RI0 | 885  | 0.999  | 0.999 | Membrane receptor    | Family A G protein-coupled receptor |
| Protein-glutamine gamma-glutamyltransferase 2 inhibitor          | P21980 | 318  | 0.9905 | 0.991 | Enzyme               | Aminoacyltransferase                |
| Protein-glutamine gamma-glutamyltransferase K inhibitor          | P22735 | 61   | 0.9724 | 0.973 | Enzyme               | Aminoacyltransferase                |
| Protein-lysine 6-oxidase inhibitor                               | P28300 | 23   | 0.9822 | 0.898 | Enzyme               | Oxidoreductase                      |
| Protein-serine O-palmitoleoyltransferase porcupine inhibitor     | Q9H237 | 57   | 0.9999 | 1.000 | Enzyme               | Transferase                         |
| Protein-S-isoprenylcysteine O-methyltransferase inhibitor        | O60725 | 165  | 0.999  | 0.999 | Enzyme               | Transferase                         |
| Protein-tyrosine kinase 2-beta inhibitor                         | Q14289 | 332  | 0.9389 | 0.939 | Enzyme               | Kinase                              |
| Protein-tyrosine kinase 6 inhibitor                              | Q13882 | 147  | 0.9605 | 0.961 | Enzyme               | Kinase                              |
| Prothrombin inhibitor                                            | P00734 | 4246 | 0.9903 | 0.99  | Enzyme               | Protease                            |
| Proton-coupled folate transporter inhibitor                      | Q96NT5 | 33   | 0.9999 | 1.000 | Transporter          | Electrochemical transporter         |
| Proto-oncogene tyrosine-protein kinase receptor Ret antagonist   | P07949 | 566  | 0.9732 | 0.973 | Enzyme               | Kinase                              |
| Proto-oncogene tyrosine-protein kinase ROS inhibitor             | P08922 | 150  | 0.9738 | 0.974 | Enzyme               | Kinase                              |
| Proto-oncogene tyrosine-protein kinase Src inhibitor             | P12931 | 2783 | 0.9752 | 0.975 | Enzyme               | Kinase                              |
| Proto-oncogene Wnt-3 inhibitor                                   | P56703 | 23   | 1.000  | 1.000 | Secreted protein     | NA                                  |
| Protoporphyrinogen oxidase inhibitor                             | P50336 | 64   | 0.9975 | 0.998 | Enzyme               | Oxidoreductase                      |
| P-selectin inhibitor                                             | P16109 | 65   | 0.9996 | 1.000 | Adhesion             | NA                                  |
| PTPsigma-(Brain) inhibitor                                       | Q9UM81 | 7    | 0.8778 | 0.88  | Unclassified protein | NA                                  |
| Purine nucleoside phosphorylase inhibitor                        | P00491 | 186  | 0.9999 | 1.000 | Enzyme               | Transferase                         |
| Puromycin-sensitive aminopeptidase inhibitor                     | P55786 | 15   | 0.9906 | 0.991 | Enzyme               | Protease                            |
| Putative inactive group IIC secretory phospholipase A2 inhibitor | Q5R387 | 10   | 0.9999 | 1.000 | Enzyme               | NA                                  |
| Putative P2Y purinoceptor 10 agonist                             | O00398 | 22   | 1.000  | 1.000 | Membrane receptor    | Family A G protein-coupled receptor |
| Pyroglutamylated RF-amide peptide receptor agonist               | Q96P65 | 100  | 0.9999 | 1.000 | Membrane receptor    | Family A G protein-coupled receptor |
| Pyroglutamylated RF-amide peptide receptor antagonist            | Q96P65 | 63   | 0.9952 | 0.995 | Membrane receptor    | Family A G protein-coupled receptor |
| Pyrroline-5-carboxylate reductase 1, mitochondrial inhibitor     | P32322 | 3    | 1.000  | 1.000 | Enzyme               | Oxidoreductase                      |
| Pyruvate kinase PKLR inhibitor                                   | P30613 | 3    | 1.000  | 1.000 | Enzyme               | NA                                  |
| Pyruvate kinase PKM inhibitor                                    | P14618 | 1779 | 0.8595 | 0.859 | Enzyme               | NA                                  |

|                                                                   |        |      |        |       |                           |                                     |
|-------------------------------------------------------------------|--------|------|--------|-------|---------------------------|-------------------------------------|
| RAC-alpha serine/threonine-protein kinase inhibitor               | P31749 | 2676 | 0.9843 | 0.984 | Enzyme                    | Kinase                              |
| RAC-beta serine/threonine-protein kinase inhibitor                | P31751 | 1020 | 0.9966 | 0.996 | Enzyme                    | Kinase                              |
| RAC-gamma serine/threonine-protein kinase inhibitor               | Q9Y243 | 237  | 0.9895 | 0.988 | Enzyme                    | Kinase                              |
| RAF proto-oncogene serine/threonine-protein kinase inhibitor      | P04049 | 1140 | 0.9871 | 0.987 | Enzyme                    | Kinase                              |
| Rap guanine nucleotide exchange factor 3 inhibitor                | O95398 | 12   | 0.9131 | 0.914 | Unclassified protein      | NA                                  |
| Rap guanine nucleotide exchange factor 4 inhibitor                | Q8WZA2 | 33   | 0.9965 | 0.996 | Unclassified protein      | NA                                  |
| Ras guanyl-releasing protein 3 inhibitor                          | Q8IV61 | 11   | 1.000  | 1.000 | Other cytosolic protein   | NA                                  |
| Ras-related C3 botulinum toxin substrate 1 inhibitor              | P63000 | 8    | 0.8111 | 0.809 | Enzyme                    | Hydrolase                           |
| Ras-related protein Rab-7a inhibitor                              | P51149 | 23   | 1.000  | 1.000 | Enzyme                    | Hydrolase                           |
| Receptor tyrosine-protein kinase erbB-2 antagonist                | P04626 | 1912 | 0.9863 | 0.986 | Enzyme                    | Kinase                              |
| Receptor tyrosine-protein kinase erbB-3 antagonist                | P21860 | 41   | 0.9984 | 0.998 | Enzyme                    | Kinase                              |
| Receptor tyrosine-protein kinase erbB-4 antagonist                | Q15303 | 642  | 0.9852 | 0.985 | Enzyme                    | Kinase                              |
| Receptor-interacting serine/threonine-protein kinase 1 antagonist | Q13546 | 288  | 0.9876 | 0.988 | Enzyme                    | Kinase                              |
| Receptor-interacting serine/threonine-protein kinase 2 antagonist | O43353 | 112  | 0.9664 | 0.965 | Enzyme                    | Kinase                              |
| Receptor-type tyrosine-protein kinase FLT3 antagonist             | P36888 | 2131 | 0.98   | 0.98  | Enzyme                    | Kinase                              |
| Receptor-type tyrosine-protein phosphatase alpha antagonist       | P18433 | 23   | 0.9892 | 0.989 | Enzyme                    | Phosphatase                         |
| Receptor-type tyrosine-protein phosphatase beta antagonist        | P23467 | 138  | 0.9937 | 0.989 | Enzyme                    | Phosphatase                         |
| Receptor-type tyrosine-protein phosphatase C antagonist           | P08575 | 125  | 0.9794 | 0.97  | Enzyme                    | Phosphatase                         |
| Receptor-type tyrosine-protein phosphatase epsilon antagonist     | P23469 | 5    | 1.000  | 1.000 | Enzyme                    | Phosphatase                         |
| Receptor-type tyrosine-protein phosphatase F antagonist           | P10586 | 44   | 0.9738 | 0.972 | Enzyme; Membrane receptor | Phosphatase                         |
| Receptor-type tyrosine-protein phosphatase gamma antagonist       | P23470 | 17   | 0.9995 | 1.000 | Enzyme                    | Phosphatase                         |
| Receptor-type tyrosine-protein phosphatase O antagonist           | Q16827 | 7    | 0.9961 | 0.996 | Enzyme                    | Hydrolase                           |
| Receptor-type tyrosine-protein phosphatase S antagonist           | Q13332 | 17   | 0.9995 | 1.000 | Enzyme                    | Phosphatase                         |
| Receptor-type tyrosine-protein phosphatase zeta antagonist        | P23471 | 5    | 1.000  | 1.000 | Enzyme                    | Hydrolase                           |
| RecQ-like DNA helicase BLM inhibitor                              | P54132 | 499  | 0.8543 | 0.854 | Enzyme                    | NA                                  |
| Reduced folate transporter inhibitor                              | P41440 | 25   | 0.9999 | 1.000 | Transporter               | Electrochemical transporter         |
| Regulator of G-protein signaling 12 inhibitor                     | O14924 | 34   | 0.9491 | 0.951 | Enzyme                    | NA                                  |
| Regulator of G-protein signaling 17 inhibitor                     | Q9UGC6 | 4    | 0.8766 | 0.879 | Unclassified protein      | NA                                  |
| Regulator of G-protein signaling 4 inhibitor                      | P49798 | 39   | 1.000  | 1.000 | Unclassified protein      | NA                                  |
| Regulator of G-protein signaling 8 inhibitor                      | P57771 | 10   | 1.000  | 1.000 | Enzyme                    | NA                                  |
| Relaxin receptor 1 agonist                                        | Q9HBX9 | 315  | 0.9208 | 0.92  | Membrane receptor         | Family A G protein-coupled receptor |

|                                                                                             |        |      |        |       |                      |                                     |
|---------------------------------------------------------------------------------------------|--------|------|--------|-------|----------------------|-------------------------------------|
| Relaxin-3 receptor 1 agonist                                                                | Q9NSD7 | 19   | 0.9999 | 1.000 | Membrane receptor    | Family A G protein-coupled receptor |
| Relaxin-3 receptor 1 antagonist                                                             | Q9NSD7 | 10   | 0.989  | 0.989 | Membrane receptor    | Family A G protein-coupled receptor |
| Relaxin-3 receptor 2 agonist                                                                | Q8TDU9 | 23   | 0.9999 | 1.000 | Membrane receptor    | Family A G protein-coupled receptor |
| Relaxin-3 receptor 2 antagonist                                                             | Q8TDU9 | 6    | 0.9998 | 1.000 | Membrane receptor    | Family A G protein-coupled receptor |
| Renin inhibitor                                                                             | P00797 | 2998 | 0.9976 | 0.998 | Enzyme               | Protease                            |
| REST corepressor 1 inhibitor                                                                | Q9UKL0 | 107  | 0.9928 | 0.993 | Unclassified protein | NA                                  |
| REST corepressor 3 inhibitor                                                                | Q9P2K3 | 3    | 1.000  | 1.000 | Unclassified protein | NA                                  |
| Retinal dehydrogenase 2 inhibitor                                                           | O94788 | 29   | 0.9646 | 0.952 | Enzyme               | NA                                  |
| Retinal rod rhodopsin-sensitive cGMP 3',5'-cyclic phosphodiesterase subunit delta inhibitor | O43924 | 68   | 0.9999 | 1.000 | Enzyme               | Phosphodiesterase                   |
| Retinoblastoma-associated protein inhibitor                                                 | P06400 | 16   | 0.9934 | 0.993 | Unclassified protein | NA                                  |
| Retinoblastoma-binding protein 5 inhibitor                                                  | Q15291 | 36   | 0.9999 | 1.000 | Unclassified protein | NA                                  |
| Retinoic acid receptor alpha agonist                                                        | P10276 | 29   | 0.9994 | 0.999 | Transcription factor | Nuclear receptor                    |
| Retinoic acid receptor alpha antagonist                                                     | P10276 | 86   | 0.9994 | 0.999 | Transcription factor | Nuclear receptor                    |
| Retinoic acid receptor beta agonist                                                         | P10826 | 51   | 0.9994 | 0.999 | Transcription factor | Nuclear receptor                    |
| Retinoic acid receptor beta antagonist                                                      | P10826 | 89   | 0.9993 | 0.999 | Transcription factor | Nuclear receptor                    |
| Retinoic acid receptor gamma agonist                                                        | P13631 | 65   | 0.9996 | 1.000 | Transcription factor | Nuclear receptor                    |
| Retinoic acid receptor gamma antagonist                                                     | P13631 | 86   | 0.9917 | 0.992 | Transcription factor | Nuclear receptor                    |
| Retinoic acid receptor RXR-alpha agonist                                                    | P19793 | 103  | 0.9986 | 0.999 | Transcription factor | Nuclear receptor                    |
| Retinoic acid receptor RXR-alpha antagonist                                                 | P19793 | 232  | 0.993  | 0.993 | Transcription factor | Nuclear receptor                    |
| Retinoic acid receptor RXR-beta agonist                                                     | P28702 | 33   | 0.9996 | 1.000 | Transcription factor | Nuclear receptor                    |
| Retinoic acid receptor RXR-beta antagonist                                                  | P28702 | 50   | 0.9986 | 0.999 | Transcription factor | Nuclear receptor                    |
| Retinoic acid receptor RXR-gamma agonist                                                    | P48443 | 32   | 0.9998 | 1.000 | Transcription factor | Nuclear receptor                    |
| Retinoic acid receptor RXR-gamma antagonist                                                 | P48443 | 69   | 0.9971 | 0.997 | Transcription factor | Nuclear receptor                    |
| Retinol-binding protein 4 inhibitor                                                         | P02753 | 197  | 0.9994 | 1.000 | Secreted protein     | NA                                  |
| Rho GDP-dissociation inhibitor 1 inhibitor                                                  | P52565 | 6    | 1.000  | 1.000 | Unclassified protein | NA                                  |
| Rho-associated protein kinase 1 inhibitor                                                   | Q13464 | 1045 | 0.9903 | 0.99  | Enzyme               | Kinase                              |
| Rho-associated protein kinase 2 inhibitor                                                   | O75116 | 1844 | 0.9881 | 0.988 | Enzyme               | Kinase                              |
| Rhodopsin kinase GRK1 inhibitor                                                             | Q15835 | 12   | 0.8981 | 0.902 | Enzyme               | Kinase                              |
| Rhodopsin kinase GRK7 inhibitor                                                             | Q8WTQ7 | 8    | 0.8251 | 0.828 | Enzyme               | Kinase                              |
| Ribonuclease H1 inhibitor                                                                   | O60930 | 15   | 0.9915 | 0.992 | Enzyme               | Hydrolase                           |

|                                                                          |        |      |        |       |                      |                                       |
|--------------------------------------------------------------------------|--------|------|--------|-------|----------------------|---------------------------------------|
| Ribonucleoside-diphosphate reductase large subunit inhibitor             | P23921 | 22   | 0.9989 | 0.999 | Enzyme               | Oxidoreductase                        |
| Ribonucleoside-diphosphate reductase subunit M2 B inhibitor              | Q7LG56 | 48   | 1.000  | 1.000 | Enzyme               | NA                                    |
| Ribonucleoside-diphosphate reductase subunit M2 inhibitor                | P31350 | 23   | 1.000  | 1.000 | Enzyme               | Oxidoreductase                        |
| Ribosomal protein S6 kinase alpha-1 inhibitor                            | Q15418 | 83   | 0.928  | 0.926 | Enzyme               | Kinase                                |
| Ribosomal protein S6 kinase alpha-2 inhibitor                            | Q15349 | 272  | 0.9875 | 0.988 | Enzyme               | Kinase                                |
| Ribosomal protein S6 kinase alpha-3 inhibitor                            | P51812 | 330  | 0.9824 | 0.982 | Enzyme               | Kinase                                |
| Ribosomal protein S6 kinase alpha-5 inhibitor                            | O75582 | 103  | 0.9507 | 0.949 | Enzyme               | Kinase                                |
| Ribosomal protein S6 kinase alpha-6 inhibitor                            | Q9UK32 | 21   | 0.9393 | 0.941 | Enzyme               | Kinase                                |
| Ribosomal protein S6 kinase beta-1 inhibitor                             | P23443 | 1375 | 0.9881 | 0.988 | Enzyme               | Kinase                                |
| Ribosomal protein S6 kinase beta-2 inhibitor                             | Q9UBS0 | 25   | 0.8898 | 0.892 | Enzyme               | Kinase                                |
| Ribosylidihyronicotinamide dehydrogenase [quinone] inhibitor             | P16083 | 261  | 0.9889 | 0.989 | Enzyme               | Oxidoreductase                        |
| RNA-binding protein EWS inhibitor                                        | Q01844 | 5    | 1.000  | 1.000 | Unclassified protein | NA                                    |
| Rod cGMP-specific 3',5'-cyclic phosphodiesterase subunit alpha inhibitor | P16499 | 44   | 0.9819 | 0.982 | Enzyme               | Phosphodiesterase                     |
| Rod cGMP-specific 3',5'-cyclic phosphodiesterase subunit beta inhibitor  | P35913 | 76   | 0.9879 | 0.988 | Enzyme               | Phosphodiesterase                     |
| Ryanodine receptor 1 antagonist                                          | P21817 | 4    | 0.9502 | 0.951 | Ion channel          | Ligand-gated ion channel              |
| Ryanodine receptor 2 antagonist                                          | Q92736 | 50   | 1.000  | 1.000 | Ion channel          | Ligand-gated ion channel              |
| S-adenosylhomocysteine hydrolase-like protein 1 inhibitor                | O43865 | 3    | 1.000  | 1.000 | Enzyme               | NA                                    |
| S-adenosylmethionine decarboxylase proenzyme inhibitor                   | P17707 | 18   | 1.000  | 1.000 | Enzyme               | Lyase                                 |
| S-adenosylmethionine synthase isoform type-2 inhibitor                   | P31153 | 296  | 1.000  | 1.000 | Enzyme               | Transferase                           |
| Sarcoplasmic/endoplasmic reticulum calcium ATPase 1 inhibitor            | O14983 | 8    | 1.000  | 1.000 | Transporter; Enzyme  | Primary active transporter; Hydrolase |
| Sarcoplasmic/endoplasmic reticulum calcium ATPase 2 inhibitor            | P16615 | 8    | 0.9813 | 0.982 | Transporter; Enzyme  | Primary active transporter; Hydrolase |
| Sarcoplasmic/endoplasmic reticulum calcium ATPase 3 inhibitor            | Q93084 | 5    | 0.9598 | 0.963 | Transporter; Enzyme  | Primary active transporter; Hydrolase |
| Scavenger receptor class B member 1 antagonist                           | Q8WTV0 | 53   | 1.000  | 1.000 | Membrane receptor    | NA                                    |
| Sclerostin inhibitor                                                     | Q9BQB4 | 22   | 0.9995 | 0.999 | Unclassified protein | NA                                    |
| Secreted frizzled-related protein 1 inhibitor                            | Q8N474 | 68   | 0.9881 | 0.988 | Unclassified protein | NA                                    |
| Segment polarity protein dishevelled homolog DVL-2 inhibitor             | O14641 | 3    | 0.9999 | 1.000 | Unclassified protein | NA                                    |
| Sentrin-specific protease 1 inhibitor                                    | Q9P0U3 | 21   | 0.9921 | 0.992 | Enzyme               | Protease                              |

|                                                          |        |      |        |       |        |                |
|----------------------------------------------------------|--------|------|--------|-------|--------|----------------|
| Sentrin-specific protease 6 inhibitor                    | Q9GZR1 | 297  | 0.944  | 0.943 | Enzyme | Protease       |
| Sentrin-specific protease 7 inhibitor                    | Q9BQF6 | 572  | 0.9387 | 0.939 | Enzyme | Protease       |
| Sentrin-specific protease 8 inhibitor                    | Q96LD8 | 231  | 0.9498 | 0.945 | Enzyme | Protease       |
| Sepiapterin reductase inhibitor                          | P35270 | 1022 | 0.992  | 0.991 | Enzyme | Oxidoreductase |
| Serine hydrolase RBBP9 inhibitor                         | O75884 | 5    | 1.000  | 1.000 | Enzyme | Hydrolase      |
| Serine hydroxymethyltransferase, mitochondrial inhibitor | P34897 | 177  | 0.9609 | 0.959 | Enzyme | Transferase    |
| Serine palmitoyltransferase 1 inhibitor                  | O15269 | 4    | 0.9866 | 0.987 | Enzyme | Transferase    |
| Serine palmitoyltransferase 2 inhibitor                  | O15270 | 8    | 0.9997 | 1.000 | Enzyme | Transferase    |
| Serine protease 1 inhibitor                              | P07477 | 769  | 0.9958 | 0.996 | Enzyme | Protease       |
| Serine protease hepsin inhibitor                         | P05981 | 195  | 0.9777 | 0.977 | Enzyme | Protease       |
| Serine protease HTRA1 inhibitor                          | Q92743 | 170  | 1.000  | 1.000 | Enzyme | Hydrolase      |
| Serine/threonine-protein kinase 17A inhibitor            | Q9UEE5 | 65   | 0.9727 | 0.974 | Enzyme | Kinase         |
| Serine/threonine-protein kinase 17B inhibitor            | O94768 | 77   | 0.9738 | 0.975 | Enzyme | Kinase         |
| Serine/threonine-protein kinase 26 inhibitor             | Q9P289 | 17   | 0.9072 | 0.906 | Enzyme | Kinase         |
| Serine/threonine-protein kinase 3 inhibitor              | Q13188 | 39   | 0.9172 | 0.902 | Enzyme | Kinase         |
| Serine/threonine-protein kinase 32A inhibitor            | Q8WU08 | 3    | 0.983  | 0.983 | Enzyme | Kinase         |
| Serine/threonine-protein kinase 33 inhibitor             | Q9BYT3 | 27   | 0.9068 | 0.908 | Enzyme | Kinase         |
| Serine/threonine-protein kinase 36 inhibitor             | Q9NRP7 | 4    | 0.8938 | 0.907 | Enzyme | Kinase         |
| Serine/threonine-protein kinase 4 inhibitor              | Q13043 | 184  | 0.9918 | 0.992 | Enzyme | Kinase         |
| Serine/threonine-protein kinase A-Raf inhibitor          | P10398 | 64   | 0.9773 | 0.977 | Enzyme | Kinase         |
| Serine/threonine-protein kinase ATR inhibitor            | Q13535 | 230  | 0.9908 | 0.991 | Enzyme | Kinase         |
| Serine/threonine-protein kinase B-raf inhibitor          | P15056 | 2881 | 0.9891 | 0.989 | Enzyme | Kinase         |
| Serine/threonine-protein kinase BRSK1 inhibitor          | Q8TDC3 | 6    | 0.8732 | 0.876 | Enzyme | Kinase         |
| Serine/threonine-protein kinase BRSK2 inhibitor          | Q8IWQ3 | 12   | 0.8665 | 0.865 | Enzyme | Kinase         |
| Serine/threonine-protein kinase Chk1 inhibitor           | O14757 | 1898 | 0.9908 | 0.991 | Enzyme | Kinase         |
| Serine/threonine-protein kinase Chk2 inhibitor           | O96017 | 517  | 0.9828 | 0.983 | Enzyme | Kinase         |
| Serine/threonine-protein kinase D1 inhibitor             | Q15139 | 125  | 0.9844 | 0.985 | Enzyme | Kinase         |
| Serine/threonine-protein kinase D2 inhibitor             | Q9BZL6 | 62   | 0.9369 | 0.937 | Enzyme | Kinase         |
| Serine/threonine-protein kinase DCLK1 inhibitor          | O15075 | 34   | 0.9834 | 0.983 | Enzyme | Kinase         |
| Serine/threonine-protein kinase DCLK3 inhibitor          | Q9C098 | 3    | 0.9789 | 0.979 | Enzyme | Kinase         |
| Serine/threonine-protein kinase haspin inhibitor         | Q8TF76 | 38   | 0.9462 | 0.949 | Enzyme | Kinase         |
| Serine/threonine-protein kinase LATS1 inhibitor          | O95835 | 269  | 0.9984 | 0.998 | Enzyme | Kinase         |

|                                                       |        |      |        |       |        |             |
|-------------------------------------------------------|--------|------|--------|-------|--------|-------------|
| Serine/threonine-protein kinase LATS2 inhibitor       | Q9NRM7 | 124  | 0.9934 | 0.993 | Enzyme | Kinase      |
| Serine/threonine-protein kinase LMTK3 inhibitor       | Q96Q04 | 19   | 0.9643 | 0.965 | Enzyme | Transferase |
| Serine/threonine-protein kinase MARK1 inhibitor       | Q9P0L2 | 16   | 0.8546 | 0.858 | Enzyme | Kinase      |
| Serine/threonine-protein kinase MARK2 inhibitor       | Q7KZI7 | 16   | 0.9136 | 0.913 | Enzyme | Kinase      |
| Serine/threonine-protein kinase MRCK alpha inhibitor  | Q5VT25 | 30   | 0.9504 | 0.912 | Enzyme | Kinase      |
| Serine/threonine-protein kinase mTOR inhibitor        | P42345 | 3432 | 0.9865 | 0.986 | Enzyme | Kinase      |
| Serine/threonine-protein kinase N1 inhibitor          | Q16512 | 23   | 0.8705 | 0.852 | Enzyme | Kinase      |
| Serine/threonine-protein kinase N2 inhibitor          | Q16513 | 30   | 0.9519 | 0.95  | Enzyme | Kinase      |
| Serine/threonine-protein kinase Nek1 inhibitor        | Q96PY6 | 197  | 0.9895 | 0.99  | Enzyme | Kinase      |
| Serine/threonine-protein kinase Nek2 inhibitor        | P51955 | 100  | 0.9537 | 0.955 | Enzyme | Kinase      |
| Serine/threonine-protein kinase Nek6 inhibitor        | Q9HC98 | 18   | 0.9675 | 0.968 | Enzyme | Kinase      |
| Serine/threonine-protein kinase Nek7 inhibitor        | Q8TDX7 | 6    | 0.9709 | 0.971 | Enzyme | Kinase      |
| Serine/threonine-protein kinase NLK inhibitor         | Q9UBE8 | 10   | 0.8257 | 0.797 | Enzyme | Kinase      |
| Serine/threonine-protein kinase PAK 1 inhibitor       | Q13153 | 216  | 0.9682 | 0.968 | Enzyme | Kinase      |
| Serine/threonine-protein kinase PAK 2 inhibitor       | Q13177 | 44   | 0.9781 | 0.979 | Enzyme | Kinase      |
| Serine/threonine-protein kinase PAK 3 inhibitor       | O75914 | 13   | 0.9457 | 0.947 | Enzyme | Kinase      |
| Serine/threonine-protein kinase PAK 4 inhibitor       | Q96013 | 203  | 0.9816 | 0.981 | Enzyme | Kinase      |
| Serine/threonine-protein kinase pim-1 inhibitor       | P11309 | 2629 | 0.9896 | 0.99  | Enzyme | Kinase      |
| Serine/threonine-protein kinase pim-2 inhibitor       | Q9P1W9 | 1348 | 0.9952 | 0.995 | Enzyme | Kinase      |
| Serine/threonine-protein kinase pim-3 inhibitor       | Q86V86 | 912  | 0.9926 | 0.993 | Enzyme | Kinase      |
| Serine/threonine-protein kinase PLK1 inhibitor        | P53350 | 724  | 0.9841 | 0.984 | Enzyme | Kinase      |
| Serine/threonine-protein kinase PLK2 inhibitor        | Q9NYY3 | 179  | 0.9827 | 0.983 | Enzyme | Kinase      |
| Serine/threonine-protein kinase PLK3 inhibitor        | Q9H4B4 | 163  | 0.9564 | 0.957 | Enzyme | Kinase      |
| Serine/threonine-protein kinase PLK4 inhibitor        | O00444 | 156  | 0.9759 | 0.972 | Enzyme | Kinase      |
| Serine/threonine-protein kinase receptor R3 inhibitor | P37023 | 66   | 0.9709 | 0.972 | Enzyme | Kinase      |
| Serine/threonine-protein kinase Sgk1 inhibitor        | O00141 | 144  | 0.95   | 0.949 | Enzyme | Kinase      |
| Serine/threonine-protein kinase Sgk2 inhibitor        | Q9HBY8 | 6    | 0.8378 | 0.838 | Enzyme | Kinase      |
| Serine/threonine-protein kinase SMG1 inhibitor        | Q96Q15 | 27   | 1.000  | 1.000 | Enzyme | Kinase      |
| Serine/threonine-protein kinase STK11 inhibitor       | Q15831 | 7    | 0.8607 | 0.862 | Enzyme | Kinase      |
| Serine/threonine-protein kinase TAO1 inhibitor        | Q7L7X3 | 65   | 0.9546 | 0.949 | Enzyme | Kinase      |
| Serine/threonine-protein kinase TAO3 inhibitor        | Q9H2K8 | 69   | 0.959  | 0.954 | Enzyme | Kinase      |
| Serine/threonine-protein kinase TBK1 inhibitor        | Q9UHD2 | 679  | 0.9953 | 0.995 | Enzyme | Kinase      |

|                                                                                           |        |      |        |       |                      |                           |
|-------------------------------------------------------------------------------------------|--------|------|--------|-------|----------------------|---------------------------|
| Serine/threonine-protein kinase TNNI3K inhibitor                                          | Q59H18 | 62   | 0.999  | 0.999 | Enzyme               | Kinase                    |
| Serine/threonine-protein kinase ULK1 activator                                            | O75385 | 4    | 0.9999 | 1.000 | Enzyme               | Kinase                    |
| Serine/threonine-protein kinase ULK1 inhibitor                                            | O75385 | 43   | 0.9554 | 0.956 | Enzyme               | Kinase                    |
| Serine/threonine-protein kinase ULK2 inhibitor                                            | Q8IYT8 | 14   | 0.9132 | 0.914 | Enzyme               | Kinase                    |
| Serine/threonine-protein kinase VRK1 inhibitor                                            | Q99986 | 5    | 0.9502 | 0.951 | Enzyme               | Kinase                    |
| Serine/threonine-protein kinase VRK2 inhibitor                                            | Q86Y07 | 4    | 0.9638 | 0.965 | Enzyme               | NA                        |
| Serine/threonine-protein kinase WNK1 allosteric inhibitor                                 | Q9H4A3 | 11   | 0.9998 | 1.000 | Enzyme               | Kinase                    |
| Serine/threonine-protein kinase WNK1 inhibitor                                            | Q9H4A3 | 12   | 0.9377 | 0.938 | Enzyme               | Kinase                    |
| Serine/threonine-protein kinase WNK2 inhibitor                                            | Q9Y3S1 | 7    | 0.8992 | 0.902 | Enzyme               | Kinase                    |
| Serine/threonine-protein kinase WNK3 inhibitor                                            | Q9BYP7 | 7    | 0.8395 | 0.845 | Enzyme               | Kinase                    |
| Serine/threonine-protein kinase/endoribonuclease IRE1 inhibitor                           | O75460 | 210  | 0.9898 | 0.99  | Enzyme               | NA                        |
| Serine/threonine-protein phosphatase 2A 56 kDa regulatory subunit alpha isoform inhibitor | Q15172 | 3    | 0.998  | 0.998 | Enzyme               | Phosphatase               |
| Serine/threonine-protein phosphatase 2A activator inhibitor                               | Q15257 | 4    | 1.000  | 1.000 | Enzyme               | Phosphatase               |
| Serine/threonine-protein phosphatase 2A catalytic subunit alpha isoform inhibitor         | P67775 | 9    | 0.983  | 0.983 | Enzyme               | Phosphatase               |
| Serine/threonine-protein phosphatase inhibitor                                            | Q9BPW0 | 24   | 0.8829 | 0.834 | Enzyme               | Phosphatase               |
| Serine/threonine-protein phosphatase PP1-alpha catalytic subunit inhibitor                | P62136 | 61   | 0.9177 | 0.909 | Enzyme               | Phosphatase               |
| Serine/threonine-protein phosphatase PP1-gamma catalytic subunit inhibitor                | P36873 | 20   | 0.9999 | 1.000 | Enzyme               | Phosphatase               |
| Serine-protein kinase ATM inhibitor                                                       | Q13315 | 154  | 0.9922 | 0.992 | Enzyme               | Kinase                    |
| Serum paraoxonase/arylesterase 1 inhibitor                                                | P27169 | 3    | 0.9952 | 0.995 | Enzyme               | Hydrolase                 |
| Short transient receptor potential channel 3 blocker                                      | Q13507 | 32   | 0.977  | 0.977 | Ion channel          | Voltage-gated ion channel |
| Short transient receptor potential channel 5 blocker                                      | Q9UL62 | 74   | 0.9922 | 0.992 | Ion channel          | Voltage-gated ion channel |
| Short transient receptor potential channel 6 blocker                                      | Q9Y210 | 39   | 1.000  | 1.000 | Ion channel          | Voltage-gated ion channel |
| Short transient receptor potential channel 7 blocker                                      | Q9HCX4 | 5    | 0.8735 | 0.848 | Unclassified protein | NA                        |
| Sialidase-1 inhibitor                                                                     | Q99519 | 22   | 1.000  | 1.000 | Enzyme               | Hydrolase                 |
| Sialidase-2 inhibitor                                                                     | Q9Y3R4 | 12   | 1.000  | 1.000 | Enzyme               | Hydrolase                 |
| Sialidase-3 inhibitor                                                                     | Q9UQ49 | 31   | 0.9999 | 1.000 | Enzyme               | Hydrolase                 |
| Sialidase-4 inhibitor                                                                     | Q8WWR8 | 23   | 1.000  | 1.000 | Enzyme               | Hydrolase                 |
| Sigma intracellular receptor 2 antagonist                                                 | Q5BJF2 | 50   | 0.8334 | 0.835 | Membrane receptor    | NA                        |
| Sigma non-opioid intracellular receptor 1 antagonist                                      | Q99720 | 1377 | 0.9882 | 0.988 | Membrane receptor    | NA                        |
| Signal peptide peptidase-like 2A inhibitor                                                | Q8TCT8 | 13   | 0.9964 | 0.997 | Enzyme               | Hydrolase                 |



|                                                                         |        |      |        |       |                      |                                            |
|-------------------------------------------------------------------------|--------|------|--------|-------|----------------------|--------------------------------------------|
| Signal transducer and activator of transcription 1-alpha/beta inhibitor | P42224 | 9    | 0.8808 | 0.881 | Transcription factor | NA                                         |
| Signal transducer and activator of transcription 3 inhibitor            | P40763 | 264  | 0.976  | 0.976 | Transcription factor | NA                                         |
| Signal transducer and activator of transcription 5B inhibitor           | P51692 | 10   | 0.9839 | 0.983 | Transcription factor | NA                                         |
| Signal transducer and activator of transcription 6 inhibitor            | P42226 | 102  | 0.9994 | 1.000 | Transcription factor | NA                                         |
| Small conductance calcium-activated potassium channel protein 1 blocker | Q92952 | 9    | 0.8069 | 0.772 | Ion channel          | Voltage-gated ion channel                  |
| Small conductance calcium-activated potassium channel protein 2 blocker | Q9H2S1 | 11   | 0.9604 | 0.933 | Ion channel          | Voltage-gated ion channel                  |
| Small conductance calcium-activated potassium channel protein 3 blocker | Q9UGI6 | 22   | 0.9363 | 0.928 | Ion channel          | Voltage-gated ion channel                  |
| S-methyl-5'-thioadenosine phosphorylase inhibitor                       | Q13126 | 44   | 1.000  | 1.000 | Enzyme               | NA                                         |
| Smoothened homolog inhibitor                                            | Q99835 | 196  | 0.9941 | 0.994 | Membrane receptor    | Frizzled family G protein-coupled receptor |
| Sodium- and chloride-dependent betaine transporter inhibitor            | P48065 | 9    | 0.9789 | 0.976 | Transporter          | Electrochemical transporter                |
| Sodium- and chloride-dependent GABA transporter 1 inhibitor             | P30531 | 56   | 0.9998 | 1.000 | Transporter          | Electrochemical transporter                |
| Sodium- and chloride-dependent GABA transporter 2 inhibitor             | Q9NSD5 | 4    | 0.8891 | 0.892 | Transporter          | Electrochemical transporter                |
| Sodium- and chloride-dependent GABA transporter 3 inhibitor             | P48066 | 9    | 0.9662 | 0.967 | Transporter          | Electrochemical transporter                |
| Sodium- and chloride-dependent glycine transporter 1 inhibitor          | P48067 | 1253 | 0.9976 | 0.998 | Transporter          | Electrochemical transporter                |
| Sodium- and chloride-dependent glycine transporter 2 inhibitor          | Q9Y345 | 143  | 0.998  | 0.998 | Transporter          | Electrochemical transporter                |
| Sodium channel protein type 1 subunit alpha blocker                     | P35498 | 49   | 0.9718 | 0.973 | Ion channel          | Voltage-gated ion channel                  |
| Sodium channel protein type 10 subunit alpha blocker                    | Q9Y5Y9 | 189  | 0.9726 | 0.973 | Ion channel          | Voltage-gated ion channel                  |
| Sodium channel protein type 2 subunit alpha blocker                     | Q99250 | 154  | 0.9708 | 0.968 | Ion channel          | Voltage-gated ion channel                  |
| Sodium channel protein type 3 subunit alpha blocker                     | Q9NY46 | 71   | 0.9421 | 0.943 | Ion channel          | Voltage-gated ion channel                  |
| Sodium channel protein type 4 subunit alpha blocker                     | P35499 | 131  | 0.9747 | 0.975 | Ion channel          | Voltage-gated ion channel                  |
| Sodium channel protein type 5 subunit alpha activator                   | Q14524 | 9    | 1.000  | 1.000 | Ion channel          | Voltage-gated ion channel                  |
| Sodium channel protein type 5 subunit alpha blocker                     | Q14524 | 695  | 0.9769 | 0.977 | Ion channel          | Voltage-gated ion channel                  |
| Sodium channel protein type 7 subunit alpha blocker                     | Q01118 | 14   | 0.8522 | 0.858 | Ion channel          | Voltage-gated ion                          |

|                                                                   |        |      |        |       |                     |                                       |
|-------------------------------------------------------------------|--------|------|--------|-------|---------------------|---------------------------------------|
|                                                                   |        |      |        |       |                     | channel                               |
| Sodium channel protein type 8 subunit alpha blocker               | Q9UQD0 | 61   | 0.9455 | 0.945 | Ion channel         | Voltage-gated ion channel             |
| Sodium channel protein type 9 subunit alpha blocker               | Q15858 | 5312 | 0.9902 | 0.99  | Ion channel         | Voltage-gated ion channel             |
| Sodium/bile acid cotransporter inhibitor                          | Q14973 | 19   | 0.8855 | 0.887 | Transporter         | Electrochemical transporter           |
| Sodium/glucose cotransporter 1 inhibitor                          | P13866 | 875  | 0.9968 | 0.997 | Transporter         | Electrochemical transporter           |
| Sodium/glucose cotransporter 2 inhibitor                          | P31639 | 1210 | 0.9993 | 0.999 | Transporter         | Electrochemical transporter           |
| Sodium/hydrogen exchanger 1 inhibitor                             | P19634 | 220  | 0.9999 | 1.000 | Transporter         | Electrochemical transporter           |
| Sodium/hydrogen exchanger 2 inhibitor                             | Q9UBY0 | 7    | 0.9571 | 0.958 | Transporter         | Electrochemical transporter           |
| Sodium/hydrogen exchanger 3 inhibitor                             | P48764 | 204  | 1.000  | 1.000 | Transporter         | Electrochemical transporter           |
| Sodium/hydrogen exchanger 5 inhibitor                             | Q14940 | 4    | 0.8188 | 0.823 | Transporter         | Electrochemical transporter           |
| Sodium/nucleoside cotransporter 2 inhibitor                       | O43868 | 24   | 1.000  | 1.000 | Transporter         | Electrochemical transporter           |
| Sodium/potassium-transporting ATPase subunit alpha-1 inhibitor    | P05023 | 4    | 1.000  | 1.000 | Transporter; Enzyme | Primary active transporter; Hydrolase |
| Sodium/potassium-transporting ATPase subunit beta-2 inhibitor     | P14415 | 148  | 0.9987 | 0.999 | Transporter; Enzyme | Primary active transporter; Hydrolase |
| Sodium-dependent dopamine transporter inhibitor                   | Q01959 | 1476 | 0.9888 | 0.988 | Transporter         | Electrochemical transporter           |
| Sodium-dependent neutral amino acid transporter B(0)AT2 inhibitor | Q9H2J7 | 11   | 1.000  | 1.000 | Transporter         | Electrochemical transporter           |
| Sodium-dependent noradrenaline transporter inhibitor              | P23975 | 1869 | 0.9928 | 0.993 | Transporter         | Electrochemical transporter           |
| Sodium-dependent phosphate transport protein 2A inhibitor         | Q06495 | 9    | 0.9086 | 0.91  | Transporter         | Electrochemical transporter           |
| Sodium-dependent proline transporter inhibitor                    | Q99884 | 49   | 0.9999 | 1.000 | Transporter         | Electrochemical transporter           |
| Sodium-dependent serotonin transporter inhibitor                  | P31645 | 2538 | 0.9935 | 0.993 | Transporter         | Electrochemical transporter           |
| Solute carrier family 13 member 5 inhibitor                       | Q86YT5 | 7    | 1.000  | 1.000 | Transporter         | Electrochemical transporter           |
| Solute carrier family 15 member 1 inhibitor                       | P46059 | 6    | 0.971  | 0.971 | Transporter         | Electrochemical transporter           |

|                                                                             |        |     |        |       |                   |                                     |
|-----------------------------------------------------------------------------|--------|-----|--------|-------|-------------------|-------------------------------------|
| Solute carrier family 15 member 2 inhibitor                                 | Q16348 | 21  | 0.9955 | 0.996 | Transporter       | Electrochemical transporter         |
| Solute carrier family 2, facilitated glucose transporter member 1 inhibitor | P11166 | 180 | 0.9732 | 0.966 | Transporter       | Electrochemical transporter         |
| Solute carrier family 2, facilitated glucose transporter member 2 inhibitor | P11168 | 85  | 0.9999 | 1.000 | Transporter       | Electrochemical transporter         |
| Solute carrier family 2, facilitated glucose transporter member 3 inhibitor | P11169 | 86  | 0.9951 | 0.995 | Transporter       | Electrochemical transporter         |
| Solute carrier family 22 member 1 inhibitor                                 | O15245 | 36  | 0.8819 | 0.887 | Transporter       | Electrochemical transporter         |
| Solute carrier family 22 member 11 inhibitor                                | Q9NSA0 | 10  | 0.971  | 0.972 | Transporter       | Electrochemical transporter         |
| Solute carrier family 22 member 12 inhibitor                                | Q96S37 | 370 | 0.9978 | 0.998 | Transporter       | Electrochemical transporter         |
| Solute carrier family 22 member 2 inhibitor                                 | O15244 | 35  | 0.8196 | 0.819 | Transporter       | Electrochemical transporter         |
| Solute carrier family 22 member 3 inhibitor                                 | O75751 | 19  | 0.9885 | 0.988 | Transporter       | Electrochemical transporter         |
| Solute carrier family 22 member 6 inhibitor                                 | Q4U2R8 | 30  | 0.9384 | 0.939 | Transporter       | Electrochemical transporter         |
| Solute carrier family 22 member 8 inhibitor                                 | Q8TCC7 | 28  | 0.9096 | 0.912 | Transporter       | Electrochemical transporter         |
| Solute carrier family 28 member 3 inhibitor                                 | Q9HAS3 | 3   | 0.9976 | 0.998 | Transporter       | Electrochemical transporter         |
| Solute carrier family 40 member 1 inhibitor                                 | Q9NP59 | 176 | 0.9941 | 0.991 | Transporter       | Electrochemical transporter         |
| Solute carrier family 5 member 4 inhibitor                                  | Q9NY91 | 26  | 0.9999 | 1.000 | Transporter       | Electrochemical transporter         |
| Solute carrier organic anion transporter family member 1B1 inhibitor        | Q9Y6L6 | 41  | 0.9146 | 0.916 | Transporter       | Electrochemical transporter         |
| Solute carrier organic anion transporter family member 1B3 inhibitor        | Q9NPD5 | 15  | 0.9188 | 0.918 | Transporter       | Electrochemical transporter         |
| Solute carrier organic anion transporter family member 2A1 inhibitor        | Q92959 | 3   | 1.000  | 1.000 | Transporter       | Electrochemical transporter         |
| Solute carrier organic anion transporter family member 2B1 inhibitor        | O94956 | 9   | 0.8251 | 0.829 | Transporter       | Electrochemical transporter         |
| Solute carrier organic anion transporter family member 4C1 inhibitor        | Q6ZQN7 | 3   | 0.9539 | 0.955 | Transporter       | Electrochemical transporter         |
| Somatostatin receptor type 1 agonist                                        | P30872 | 4   | 0.9999 | 1.000 | Membrane receptor | Family A G protein-coupled receptor |
| Somatostatin receptor type 1 antagonist                                     | P30872 | 203 | 0.995  | 0.995 | Membrane receptor | Family A G protein-coupled receptor |
| Somatostatin receptor type 2 agonist                                        | P30874 | 17  | 1.000  | 1.000 | Membrane receptor | Family A G protein-                 |

|                                               |        |      |        |       |                      |                                     |
|-----------------------------------------------|--------|------|--------|-------|----------------------|-------------------------------------|
|                                               |        |      |        |       |                      | coupled receptor                    |
| Somatostatin receptor type 2 antagonist       | P30874 | 335  | 0.9963 | 0.996 | Membrane receptor    | Family A G protein-coupled receptor |
| Somatostatin receptor type 3 agonist          | P32745 | 88   | 1.000  | 1.000 | Membrane receptor    | Family A G protein-coupled receptor |
| Somatostatin receptor type 3 antagonist       | P32745 | 414  | 0.9993 | 0.999 | Membrane receptor    | Family A G protein-coupled receptor |
| Somatostatin receptor type 4 agonist          | P31391 | 8    | 1.000  | 1.000 | Membrane receptor    | Family A G protein-coupled receptor |
| Somatostatin receptor type 4 antagonist       | P31391 | 217  | 0.9954 | 0.996 | Membrane receptor    | Family A G protein-coupled receptor |
| Somatostatin receptor type 5 antagonist       | P35346 | 523  | 0.998  | 0.998 | Membrane receptor    | Family A G protein-coupled receptor |
| Son of sevenless homolog 1 inhibitor          | Q07889 | 201  | 0.9987 | 0.999 | Unclassified protein | NA                                  |
| Sonic hedgehog protein inhibitor              | Q15465 | 6    | 0.8539 | 0.856 | Unclassified protein | NA                                  |
| Sorbitol dehydrogenase inhibitor              | Q00796 | 58   | 1.000  | 1.000 | Enzyme               | Oxidoreductase                      |
| Sortilin inhibitor                            | Q99523 | 18   | 0.9255 | 0.926 | Membrane receptor    | NA                                  |
| Spermidine synthase inhibitor                 | P19623 | 3    | 1.000  | 1.000 | Enzyme               | Transferase                         |
| Sphingomyelin phosphodiesterase 3 inhibitor   | Q9NY59 | 93   | 0.9985 | 0.999 | Enzyme               | Hydrolase                           |
| Sphingomyelin phosphodiesterase inhibitor     | P17405 | 32   | 0.9911 | 0.991 | Enzyme               | Phosphodiesterase                   |
| Sphingosine 1-phosphate receptor 1 agonist    | P21453 | 1543 | 0.9932 | 0.993 | Membrane receptor    | Family A G protein-coupled receptor |
| Sphingosine 1-phosphate receptor 1 antagonist | P21453 | 698  | 0.9811 | 0.981 | Membrane receptor    | Family A G protein-coupled receptor |
| Sphingosine 1-phosphate receptor 2 agonist    | O95136 | 34   | 0.9495 | 0.95  | Membrane receptor    | Family A G protein-coupled receptor |
| Sphingosine 1-phosphate receptor 2 antagonist | O95136 | 168  | 0.9417 | 0.941 | Membrane receptor    | Family A G protein-coupled receptor |
| Sphingosine 1-phosphate receptor 3 agonist    | Q99500 | 590  | 0.9966 | 0.997 | Membrane receptor    | Family A G protein-coupled receptor |
| Sphingosine 1-phosphate receptor 3 antagonist | Q99500 | 306  | 0.9844 | 0.985 | Membrane receptor    | Family A G protein-coupled receptor |
| Sphingosine 1-phosphate receptor 4 agonist    | O95977 | 160  | 0.9863 | 0.987 | Membrane receptor    | Family A G protein-coupled receptor |
| Sphingosine 1-phosphate receptor 4 antagonist | O95977 | 205  | 0.9532 | 0.954 | Membrane receptor    | Family A G protein-coupled receptor |
| Sphingosine 1-phosphate receptor 5 agonist    | Q9H228 | 197  | 0.9953 | 0.995 | Membrane receptor    | Family A G protein-coupled receptor |
| Sphingosine 1-phosphate receptor 5 antagonist | Q9H228 | 43   | 0.9617 | 0.961 | Membrane receptor    | Family A G protein-coupled receptor |

|                                                                  |        |      |        |       |                       |                                     |
|------------------------------------------------------------------|--------|------|--------|-------|-----------------------|-------------------------------------|
| Sphingosine kinase 1 inhibitor                                   | Q9NYA1 | 179  | 0.995  | 0.995 | Enzyme                | NA                                  |
| Sphingosine kinase 2 inhibitor                                   | Q9NRA0 | 120  | 0.9946 | 0.994 | Enzyme                | NA                                  |
| Sphingosine-1-phosphate lyase 1 inhibitor                        | O95470 | 26   | 1.000  | 1.000 | Enzyme                | Lyase                               |
| Spindlin-1 inhibitor                                             | Q9Y657 | 5    | 0.999  | 0.999 | Epigenetic regulator  | Reader                              |
| Splicing factor 3B subunit 3 inhibitor                           | Q15393 | 12   | 0.9852 | 0.986 | Other nuclear protein | NA                                  |
| Squalene monooxygenase inhibitor                                 | Q14534 | 55   | 0.9999 | 1.000 | Enzyme                | Oxidoreductase                      |
| Squalene synthase inhibitor                                      | P37268 | 167  | 0.9975 | 0.998 | Enzyme                | NA                                  |
| SRSF protein kinase 2 inhibitor                                  | P78362 | 6    | 0.8155 | 0.818 | Enzyme                | Kinase                              |
| STAM-binding protein inhibitor                                   | O95630 | 21   | 0.9984 | 0.999 | Enzyme                | Hydrolase                           |
| STE20/SPS1-related proline-alanine-rich protein kinase inhibitor | Q9UEW8 | 5    | 0.8231 | 0.825 | Enzyme                | Kinase                              |
| Stearoyl-CoA desaturase 5 inhibitor                              | Q86SK9 | 3    | 0.9988 | 0.999 | Enzyme                | Oxidoreductase                      |
| Stearoyl-CoA desaturase inhibitor                                | O00767 | 488  | 0.9983 | 0.998 | Enzyme                | NA                                  |
| Steroid 17-alpha-hydroxylase/17,20 lyase inhibitor               | P05093 | 637  | 0.9982 | 0.998 | Enzyme                | Cytochrome P450                     |
| Steroid 21-hydroxylase inhibitor                                 | P08686 | 105  | 0.999  | 0.999 | Enzyme                | Cytochrome P450                     |
| Steroid hormone receptor ERR1 agonist                            | P11474 | 13   | 0.863  | 0.866 | Transcription factor  | Nuclear receptor                    |
| Steroid hormone receptor ERR1 antagonist                         | P11474 | 152  | 0.9959 | 0.996 | Transcription factor  | Nuclear receptor                    |
| Steroid hormone receptor ERR2 agonist                            | O95718 | 20   | 0.9617 | 0.962 | Transcription factor  | Nuclear receptor                    |
| Steroid hormone receptor ERR2 antagonist                         | O95718 | 37   | 0.9985 | 0.999 | Transcription factor  | Nuclear receptor                    |
| Steroidogenic factor 1 inhibitor                                 | Q13285 | 38   | 1.000  | 1.000 | Transcription factor  | Nuclear receptor                    |
| Sterol 26-hydroxylase, mitochondrial inhibitor                   | Q02318 | 5    | 1.000  | 1.000 | Enzyme                | Cytochrome P450                     |
| Sterol O-acyltransferase 1 inhibitor                             | P35610 | 276  | 0.992  | 0.992 | Enzyme                | Transferase                         |
| Sterol O-acyltransferase 2 inhibitor                             | O75908 | 122  | 0.9881 | 0.989 | Enzyme                | Transferase                         |
| Sterol regulatory element-binding protein 2 inhibitor            | Q12772 | 17   | 0.969  | 0.969 | Transcription factor  | NA                                  |
| Steryl-sulfatase inhibitor                                       | P08842 | 371  | 0.9986 | 0.999 | Enzyme                | Hydrolase                           |
| Stimulator of interferon genes protein inhibitor                 | Q86WV6 | 22   | 0.9997 | 1.000 | Unclassified protein  | NA                                  |
| Stromal cell-derived factor 1 inhibitor                          | P48061 | 28   | 0.9997 | 1.000 | Secreted protein      | NA                                  |
| Stromal interaction molecule 1 inhibitor                         | Q13586 | 93   | 0.9998 | 1.000 | Unclassified protein  | NA                                  |
| Stromelysin-1 inhibitor                                          | P08254 | 1588 | 0.9914 | 0.991 | Enzyme                | Protease                            |
| Stromelysin-2 inhibitor                                          | P09238 | 138  | 0.9967 | 0.997 | Enzyme                | Protease                            |
| Stromelysin-3 inhibitor                                          | P24347 | 5    | 0.9744 | 0.975 | Enzyme                | Protease                            |
| Substance-K receptor antagonist                                  | P21452 | 496  | 0.9902 | 0.99  | Membrane receptor     | Family A G protein-coupled receptor |
| Substance-P receptor agonist                                     | P25103 | 5    | 1.000  | 1.000 | Membrane receptor     | Family A G protein-                 |

|                                                                                   |        |      |        |       |                      |                                         |
|-----------------------------------------------------------------------------------|--------|------|--------|-------|----------------------|-----------------------------------------|
|                                                                                   |        |      |        |       |                      | coupled receptor                        |
| Substance-P receptor antagonist                                                   | P25103 | 1196 | 0.9949 | 0.995 | Membrane receptor    | Family A G protein-coupled receptor     |
| Succinate dehydrogenase [ubiquinone] iron-sulfur subunit, mitochondrial inhibitor | P21912 | 34   | 1.000  | 1.000 | Enzyme               | Oxidoreductase                          |
| Succinate receptor 1 antagonist                                                   | Q9BXA5 | 47   | 1.000  | 1.000 | Membrane receptor    | Family A G protein-coupled receptor     |
| Sucrase-isomaltase, intestinal inhibitor                                          | P14410 | 37   | 1.000  | 1.000 | Enzyme               | NA                                      |
| Sulfotransferase 1A1 inhibitor                                                    | P50225 | 5    | 0.9862 | 0.986 | Enzyme               | Transferase                             |
| SUMO-activating enzyme subunit 1 inhibitor                                        | Q9UBE0 | 4    | 0.9996 | 1.000 | Unclassified protein | NA                                      |
| SUMO-activating enzyme subunit 2 inhibitor                                        | Q9UBT2 | 31   | 0.9999 | 1.000 | Enzyme               | Aminoacyltransferase                    |
| SUMO-conjugating enzyme UBC9 inhibitor                                            | P63279 | 3    | 1.000  | 1.000 | Enzyme               | Aminoacyltransferase                    |
| Suppressor of tumorigenicity 14 protein inhibitor                                 | Q9Y5Y6 | 477  | 0.9954 | 0.995 | Enzyme               | Protease                                |
| Synaptic vesicular amine transporter inhibitor                                    | Q05940 | 20   | 0.9586 | 0.96  | Transporter          | Electrochemical transporter             |
| Synaptojanin-2 inhibitor                                                          | O15056 | 25   | 0.979  | 0.98  | Enzyme               | Hydrolase                               |
| Tachykinin-3 inhibitor                                                            | Q9UHF0 | 6    | 1.000  | 1.000 | Secreted protein     | NA                                      |
| Target of rapamycin complex subunit LST8 inhibitor                                | Q9BVC4 | 96   | 0.9815 | 0.981 | Unclassified protein | NA                                      |
| Taste receptor type 1 member 2 agonist                                            | Q8TE23 | 105  | 0.9907 | 0.991 | Membrane receptor    | Family C G protein-coupled receptor     |
| Taste receptor type 1 member 3 agonist                                            | Q7RTX0 | 138  | 0.9988 | 0.999 | Membrane receptor    | Family C G protein-coupled receptor     |
| Taste receptor type 1 member 3 antagonist                                         | Q7RTX0 | 243  | 0.9967 | 0.997 | Membrane receptor    | Family C G protein-coupled receptor     |
| Taste receptor type 2 member 14 antagonist                                        | Q9NYV8 | 101  | 0.9991 | 0.999 | Membrane receptor    | Taste family G protein-coupled receptor |
| Taste receptor type 2 member 31 antagonist                                        | P59538 | 4    | 0.9325 | 0.933 | Membrane receptor    | Taste family G protein-coupled receptor |
| Taste receptor type 2 member 46 agonist                                           | P59540 | 5    | 0.8816 | 0.884 | Membrane receptor    | Taste family G protein-coupled receptor |
| Taste receptor type 2 member 8 antagonist                                         | Q9NYW2 | 302  | 0.9997 | 1.000 | Membrane receptor    | Taste family G protein-coupled receptor |
| Telomerase reverse transcriptase inhibitor                                        | O14746 | 506  | 0.9869 | 0.986 | Enzyme               | Transferase                             |
| Telomeric repeat-binding factor 2-interacting protein 1 inhibitor                 | Q9NYB0 | 12   | 1.000  | 1.000 | Unclassified protein | NA                                      |
| Testis-specific serine/threonine-protein kinase 1 inhibitor                       | Q9BXA7 | 13   | 0.9    | 0.904 | Enzyme               | Kinase                                  |

|                                                                    |        |      |        |       |                      |                                     |
|--------------------------------------------------------------------|--------|------|--------|-------|----------------------|-------------------------------------|
| Testis-specific serine/threonine-protein kinase 2 inhibitor        | Q96PF2 | 5    | 0.817  | 0.836 | Enzyme               | Kinase                              |
| Testis-specific serine/threonine-protein kinase 3 inhibitor        | Q96PN8 | 4    | 0.835  | 0.838 | Enzyme               | Kinase                              |
| TGF-beta receptor type-1 antagonist                                | P36897 | 1009 | 0.9921 | 0.992 | Enzyme               | Kinase                              |
| TGF-beta receptor type-2 antagonist                                | P37173 | 79   | 0.9747 | 0.975 | Enzyme               | Kinase                              |
| TGF-beta-activated kinase 1 and MAP3K7-binding protein 1 inhibitor | Q15750 | 35   | 0.9784 | 0.979 | Unclassified protein | NA                                  |
| Thiopurine S-methyltransferase inhibitor                           | P51580 | 6    | 0.9027 | 0.904 | Enzyme               | NA                                  |
| Thioredoxin inhibitor                                              | P10599 | 12   | 0.9206 | 0.921 | Enzyme               | Oxidoreductase                      |
| Thioredoxin reductase 1, cytoplasmic inhibitor                     | Q16881 | 9    | 0.8684 | 0.864 | Enzyme               | Oxidoreductase                      |
| Thioredoxin reductase 3 inhibitor                                  | Q86VQ6 | 27   | 0.9898 | 0.961 | Enzyme               | Oxidoreductase                      |
| Thiosulfate sulfurtransferase inhibitor                            | Q16762 | 16   | 0.9604 | 0.962 | Enzyme               | Transferase                         |
| Threonine aspartase 1 inhibitor                                    | Q9H6P5 | 8    | 0.9798 | 0.98  | Enzyme               | Protease                            |
| Threonine--tRNA ligase 1, cytoplasmic inhibitor                    | P26639 | 18   | 1.000  | 1.000 | Enzyme               | Ligase                              |
| Thrombopoietin receptor agonist                                    | P40238 | 202  | 0.9998 | 1.000 | Membrane receptor    | NA                                  |
| Thrombopoietin receptor antagonist                                 | P40238 | 9    | 1.000  | 1.000 | Membrane receptor    | NA                                  |
| Thrombospondin-1 inhibitor                                         | P07996 | 11   | 1.000  | 1.000 | Unclassified protein | NA                                  |
| Thromboxane A2 receptor agonist                                    | P21731 | 26   | 1.000  | 1.000 | Membrane receptor    | Family A G protein-coupled receptor |
| Thromboxane A2 receptor antagonist                                 | P21731 | 615  | 0.9964 | 0.996 | Membrane receptor    | Family A G protein-coupled receptor |
| Thromboxane-A synthase inhibitor                                   | P24557 | 713  | 0.9882 | 0.988 | Enzyme               | Cytochrome P450                     |
| Thymidine kinase 2, mitochondrial inhibitor                        | O00142 | 26   | 1.000  | 1.000 | Enzyme               | Transferase                         |
| Thymidine kinase, cytosolic inhibitor                              | P04183 | 28   | 0.9998 | 1.000 | Enzyme               | Transferase                         |
| Thymidine phosphorylase inhibitor                                  | P19971 | 93   | 0.9986 | 0.999 | Enzyme               | NA                                  |
| Thymidylate synthase inhibitor                                     | P04818 | 585  | 0.9982 | 0.998 | Enzyme               | Transferase                         |
| Thyroid hormone receptor alpha agonist                             | P10827 | 32   | 0.9996 | 1.000 | Transcription factor | Nuclear receptor                    |
| Thyroid hormone receptor alpha antagonist                          | P10827 | 207  | 0.9988 | 0.999 | Transcription factor | Nuclear receptor                    |
| Thyroid hormone receptor beta agonist                              | P10828 | 72   | 0.9998 | 1.000 | Transcription factor | Nuclear receptor                    |
| Thyroid hormone receptor beta antagonist                           | P10828 | 332  | 0.9995 | 1.000 | Transcription factor | Nuclear receptor                    |
| Thyroid peroxidase inhibitor                                       | P07202 | 8    | 0.9914 | 0.968 | Enzyme               | Oxidoreductase                      |
| Thyrotropin receptor agonist                                       | P16473 | 5651 | 0.8809 | 0.881 | Membrane receptor    | Family A G protein-coupled receptor |
| Thyrotropin receptor antagonist                                    | P16473 | 21   | 0.9957 | 0.996 | Membrane receptor    | Family A G protein-coupled receptor |
| Thyrotropin-releasing hormone receptor agonist                     | P34981 | 7    | 1.000  | 1.000 | Membrane receptor    | Family A G protein-coupled receptor |

|                                                         |        |     |        |       |                                       |                                         |
|---------------------------------------------------------|--------|-----|--------|-------|---------------------------------------|-----------------------------------------|
| Tissue alpha-L-fucosidase inhibitor                     | P04066 | 58  | 0.9991 | 0.999 | Enzyme                                | Hydrolase                               |
| Tissue factor inhibitor                                 | P13726 | 501 | 0.9945 | 0.995 | Membrane receptor;<br>Surface antigen | NA                                      |
| Tissue factor pathway inhibitor inhibitor               | P10646 | 549 | 0.9998 | 1.000 | Unclassified protein                  | NA                                      |
| Tissue-type plasminogen activator inhibitor             | P00750 | 258 | 0.9882 | 0.988 | Enzyme                                | Protease                                |
| TNF receptor-associated factor 6 inhibitor              | Q9Y4K3 | 3   | 0.9998 | 1.000 | Enzyme                                | Ligase                                  |
| Toll-like receptor 2 agonist                            | O60603 | 45  | 0.9926 | 0.993 | Membrane receptor                     | Toll-like and Il-1<br>receptors         |
| Toll-like receptor 2 antagonist                         | O60603 | 18  | 0.9833 | 0.983 | Membrane receptor                     | Toll-like and Il-1<br>receptors         |
| Toll-like receptor 4 agonist                            | O00206 | 47  | 1.000  | 1.000 | Membrane receptor                     | Toll-like and Il-1<br>receptors         |
| Toll-like receptor 4 antagonist                         | O00206 | 33  | 0.9648 | 0.965 | Membrane receptor                     | Toll-like and Il-1<br>receptors         |
| Toll-like receptor 7 agonist                            | Q9NYK1 | 271 | 0.9996 | 1.000 | Membrane receptor                     | Toll-like and Il-1<br>receptors         |
| Toll-like receptor 7 antagonist                         | Q9NYK1 | 97  | 0.9893 | 0.99  | Membrane receptor                     | Toll-like and Il-1<br>receptors         |
| Toll-like receptor 8 agonist                            | Q9NR97 | 105 | 0.9999 | 1.000 | Membrane receptor                     | Toll-like and Il-1<br>receptors         |
| Toll-like receptor 8 antagonist                         | Q9NR97 | 149 | 0.9904 | 0.991 | Membrane receptor                     | Toll-like and Il-1<br>receptors         |
| Toll-like receptor 9 antagonist                         | Q9NR96 | 133 | 0.9954 | 0.996 | Membrane receptor                     | Toll-like and Il-1<br>receptors         |
| Tolloid-like protein 1 inhibitor                        | O43897 | 392 | 1.000  | 1.000 | Enzyme                                | Hydrolase                               |
| Tolloid-like protein 2 inhibitor                        | Q9Y6L7 | 388 | 1.000  | 1.000 | Enzyme                                | Hydrolase                               |
| TP53-binding protein 1 inhibitor                        | Q12888 | 5   | 0.998  | 0.998 | Epigenetic regulator                  | Reader                                  |
| Trace amine-associated receptor 1 agonist               | Q96RJ0 | 384 | 0.965  | 0.965 | Membrane receptor                     | Family A G protein-<br>coupled receptor |
| Trace amine-associated receptor 1 antagonist            | Q96RJ0 | 35  | 0.8168 | 0.82  | Membrane receptor                     | Family A G protein-<br>coupled receptor |
| TRAF2 and NCK-interacting protein kinase inhibitor      | Q9UKE5 | 43  | 0.9366 | 0.932 | Enzyme                                | Kinase                                  |
| Transcription activator BRG1 inhibitor                  | P51532 | 18  | 0.97   | 0.973 | Epigenetic regulator                  | Reader                                  |
| Transcription factor 4 inhibitor                        | P15884 | 6   | 0.9019 | 0.904 | Transcription factor                  | NA                                      |
| Transcription factor 7-like 2 inhibitor                 | Q9NQB0 | 253 | 0.9961 | 0.996 | Transcription factor                  | NA                                      |
| Transcription factor AP-1 inhibitor                     | P05412 | 163 | 0.9709 | 0.971 | Transcription factor                  | NA                                      |
| Transcription factor p65 inhibitor                      | Q04206 | 68  | 0.9841 | 0.985 | Transcription factor                  | NA                                      |
| Transcription initiation factor IIA subunit 1 inhibitor | P52655 | 19  | 1.000  | 1.000 | Transcription factor                  | NA                                      |



|                                                                          |        |      |        |       |                      |                            |
|--------------------------------------------------------------------------|--------|------|--------|-------|----------------------|----------------------------|
| Transcription initiation factor TFIID subunit 1 inhibitor                | P21675 | 76   | 0.996  | 0.992 | Enzyme               | NA                         |
| Transcription intermediary factor 1-alpha inhibitor                      | O15164 | 82   | 0.979  | 0.979 | Epigenetic regulator | Reader                     |
| Transcriptional coactivator YAP1 inhibitor                               | P46937 | 43   | 1.000  | 1.000 | Unclassified protein | NA                         |
| Transcriptional enhancer factor TEF-3 inhibitor                          | Q15561 | 10   | 0.9699 | 0.97  | Transcription factor | NA                         |
| Transcriptional regulator ERG inhibitor                                  | P11308 | 7    | 1.000  | 1.000 | Unclassified protein | NA                         |
| Transforming protein RhoA inhibitor                                      | P61586 | 36   | 0.9993 | 0.999 | Enzyme               | Hydrolase                  |
| Transient receptor potential cation channel subfamily A member 1 blocker | O75762 | 528  | 0.9904 | 0.991 | Ion channel          | Voltage-gated ion channel  |
| Transient receptor potential cation channel subfamily M member 4 blocker | Q8TD43 | 9    | 0.9999 | 1.000 | Ion channel          | Voltage-gated ion channel  |
| Transient receptor potential cation channel subfamily M member 5 blocker | Q9NZQ8 | 62   | 1.000  | 1.000 | Ion channel          | Voltage-gated ion channel  |
| Transient receptor potential cation channel subfamily M member 8 blocker | Q7Z2W7 | 458  | 0.9954 | 0.995 | Ion channel          | Voltage-gated ion channel  |
| Transient receptor potential cation channel subfamily V member 1 blocker | Q8NER1 | 2837 | 0.9946 | 0.995 | Ion channel          | Voltage-gated ion channel  |
| Transient receptor potential cation channel subfamily V member 3 blocker | Q8NET8 | 238  | 0.9975 | 0.998 | Ion channel          | Voltage-gated ion channel  |
| Transient receptor potential cation channel subfamily V member 4 blocker | Q9HBA0 | 419  | 0.996  | 0.996 | Ion channel          | Voltage-gated ion channel  |
| Transient receptor potential cation channel subfamily V member 6 blocker | Q9H1D0 | 6    | 0.8207 | 0.821 | Ion channel          | Voltage-gated ion channel  |
| Transitional endoplasmic reticulum ATPase inhibitor                      | P55072 | 284  | 0.9953 | 0.995 | Transporter          | Primary active transporter |
| Transketolase inhibitor                                                  | P29401 | 49   | 0.9993 | 0.999 | Enzyme               | Transferase                |
| Translocator protein inhibitor                                           | P30536 | 51   | 0.9706 | 0.971 | Membrane receptor    | NA                         |
| Transmembrane domain-containing protein TMIGD3 inhibitor                 | P0DMS9 | 24   | 0.9998 | 1.000 | Unclassified protein | NA                         |
| Transmembrane prolyl 4-hydroxylase inhibitor                             | Q9NXG6 | 59   | 0.9997 | 1.000 | Enzyme               | Oxidoreductase             |
| Transmembrane protease serine 11D inhibitor                              | O60235 | 61   | 0.9999 | 1.000 | Enzyme               | Protease                   |
| Transmembrane protease serine 2 inhibitor                                | O15393 | 3    | 1.000  | 1.000 | Enzyme               | Protease                   |
| Transmembrane protease serine 4 inhibitor                                | Q9NRS4 | 13   | 0.9998 | 1.000 | Enzyme               | Protease                   |
| Transmembrane protease serine 6 inhibitor                                | Q8IU80 | 122  | 0.9989 | 0.999 | Enzyme               | Protease                   |
| Transthyretin inhibitor                                                  | P02766 | 74   | 0.9724 | 0.973 | Secreted protein     | NA                         |
| Trifunctional purine biosynthetic protein adenosine-3 inhibitor          | P22102 | 117  | 0.9924 | 0.992 | Enzyme               | Ligase                     |
| Trypsin-3 inhibitor                                                      | P35030 | 721  | 0.9908 | 0.991 | Enzyme               | Protease                   |
| Tryptase alpha/beta-1 inhibitor                                          | Q15661 | 230  | 0.9963 | 0.996 | Enzyme               | Protease                   |
| Tryptase beta-2 inhibitor                                                | P20231 | 8    | 1.000  | 1.000 | Enzyme               | Hydrolase                  |

|                                                                  |        |      |        |       |                    |                                     |
|------------------------------------------------------------------|--------|------|--------|-------|--------------------|-------------------------------------|
| Tryptase gamma inhibitor                                         | Q9NRR2 | 205  | 0.9944 | 0.995 | Enzyme             | Protease                            |
| Tryptophan 2,3-dioxygenase inhibitor                             | P48775 | 342  | 0.9985 | 0.998 | Enzyme             | Oxidoreductase                      |
| Tryptophan 5-hydroxylase 1 inhibitor                             | P17752 | 235  | 1.000  | 1.000 | Enzyme             | Oxidoreductase                      |
| Tryptophan 5-hydroxylase 2 inhibitor                             | Q8IWU9 | 5    | 0.9999 | 1.000 | Enzyme             | Oxidoreductase                      |
| Tubulin alpha-3C chain inhibitor                                 | P0DPH7 | 598  | 0.9942 | 0.994 | Structural protein | NA                                  |
| Tubulin beta chain inhibitor                                     | P07437 | 5    | 0.8944 | 0.896 | Structural protein | NA                                  |
| Tubulin beta-1 chain inhibitor                                   | Q9H4B7 | 47   | 0.9994 | 0.999 | Structural protein | NA                                  |
| Tubulin beta-3 chain inhibitor                                   | Q13509 | 7    | 0.8568 | 0.857 | Structural protein | NA                                  |
| Tumor necrosis factor inhibitor                                  | P01375 | 348  | 0.9958 | 0.995 | Secreted protein   | NA                                  |
| Tumor necrosis factor receptor superfamily member 10A antagonist | O00220 | 3    | 0.9993 | 0.999 | Membrane receptor  | NA                                  |
| Tumor necrosis factor receptor superfamily member 16 antagonist  | P08138 | 5    | 0.9933 | 0.994 | Membrane receptor  | NA                                  |
| Tumor necrosis factor receptor superfamily member 1A antagonist  | P19438 | 92   | 0.9948 | 0.995 | Membrane receptor  | NA                                  |
| Tumor necrosis factor receptor superfamily member 5 antagonist   | P25942 | 3    | 1.000  | 1.000 | Membrane receptor  | NA                                  |
| Type-1 angiotensin II receptor agonist                           | P30556 | 132  | 0.9994 | 0.999 | Membrane receptor  | Family A G protein-coupled receptor |
| Type-1 angiotensin II receptor antagonist                        | P30556 | 446  | 0.9949 | 0.995 | Membrane receptor  | Family A G protein-coupled receptor |
| Type-2 angiotensin II receptor antagonist                        | P50052 | 438  | 0.9975 | 0.998 | Membrane receptor  | Family A G protein-coupled receptor |
| Tyrosinase inhibitor                                             | P14679 | 55   | 0.9946 | 0.995 | Enzyme             | Oxidoreductase                      |
| Tyrosine-protein kinase ABL1 activator                           | P00519 | 24   | 0.9987 | 0.999 | Enzyme             | Kinase                              |
| Tyrosine-protein kinase ABL1 allosteric inhibitor                | P00519 | 6    | 1.000  | 1.000 | Enzyme             | Kinase                              |
| Tyrosine-protein kinase ABL1 inhibitor                           | P00519 | 2024 | 0.9716 | 0.972 | Enzyme             | Kinase                              |
| Tyrosine-protein kinase ABL2 inhibitor                           | P42684 | 24   | 0.8368 | 0.794 | Enzyme             | Kinase                              |
| Tyrosine-protein kinase Blk inhibitor                            | P51451 | 76   | 0.9449 | 0.945 | Enzyme             | Kinase                              |
| Tyrosine-protein kinase BTK inhibitor                            | Q06187 | 2229 | 0.9918 | 0.992 | Enzyme             | Kinase                              |
| Tyrosine-protein kinase CSK inhibitor                            | P41240 | 84   | 0.9158 | 0.914 | Enzyme             | Kinase                              |
| Tyrosine-protein kinase Fer inhibitor                            | P16591 | 26   | 0.8765 | 0.882 | Enzyme             | Kinase                              |
| Tyrosine-protein kinase Fes/Fps inhibitor                        | P07332 | 19   | 0.8434 | 0.841 | Enzyme             | Kinase                              |
| Tyrosine-protein kinase Fgr inhibitor                            | P09769 | 50   | 0.8585 | 0.859 | Enzyme             | Kinase                              |
| Tyrosine-protein kinase Fyn inhibitor                            | P06241 | 197  | 0.9022 | 0.902 | Enzyme             | Kinase                              |
| Tyrosine-protein kinase HCK inhibitor                            | P08631 | 337  | 0.9852 | 0.985 | Enzyme             | Kinase                              |
| Tyrosine-protein kinase ITK/TSK activator                        | Q08881 | 22   | 1.000  | 1.000 | Enzyme             | Kinase                              |
| Tyrosine-protein kinase ITK/TSK inhibitor                        | Q08881 | 870  | 0.9934 | 0.993 | Enzyme             | Kinase                              |

|                                                               |        |      |        |       |        |                   |
|---------------------------------------------------------------|--------|------|--------|-------|--------|-------------------|
| Tyrosine-protein kinase JAK1 inhibitor                        | P23458 | 3160 | 0.992  | 0.992 | Enzyme | Kinase            |
| Tyrosine-protein kinase JAK2 inhibitor                        | O60674 | 4429 | 0.9877 | 0.988 | Enzyme | Kinase            |
| Tyrosine-protein kinase JAK3 inhibitor                        | P52333 | 2456 | 0.9867 | 0.987 | Enzyme | Kinase            |
| Tyrosine-protein kinase Lck inhibitor                         | P06239 | 1531 | 0.9688 | 0.969 | Enzyme | Kinase            |
| Tyrosine-protein kinase Lyn inhibitor                         | P07948 | 283  | 0.9603 | 0.959 | Enzyme | Kinase            |
| Tyrosine-protein kinase Mer inhibitor                         | Q12866 | 242  | 0.9727 | 0.973 | Enzyme | Kinase            |
| Tyrosine-protein kinase receptor Tie-1 inhibitor              | P35590 | 4    | 0.9999 | 1.000 | Enzyme | Kinase            |
| Tyrosine-protein kinase receptor TYRO3 inhibitor              | Q06418 | 245  | 0.9877 | 0.988 | Enzyme | Kinase            |
| Tyrosine-protein kinase receptor UFO inhibitor                | P30530 | 386  | 0.9827 | 0.983 | Enzyme | Kinase            |
| Tyrosine-protein kinase Srms inhibitor                        | Q9H3Y6 | 9    | 0.8399 | 0.844 | Enzyme | Kinase            |
| Tyrosine-protein kinase SYK inhibitor                         | P43405 | 2376 | 0.9892 | 0.989 | Enzyme | Kinase            |
| Tyrosine-protein kinase Tec inhibitor                         | P42680 | 62   | 0.9623 | 0.962 | Enzyme | Kinase            |
| Tyrosine-protein kinase TXK inhibitor                         | P42681 | 67   | 0.9671 | 0.967 | Enzyme | Kinase            |
| Tyrosine-protein kinase Yes inhibitor                         | P07947 | 117  | 0.945  | 0.944 | Enzyme | Kinase            |
| Tyrosine-protein kinase ZAP-70 inhibitor                      | P43403 | 177  | 0.9712 | 0.97  | Enzyme | Kinase            |
| Tyrosine-protein phosphatase non-receptor type 1 inhibitor    | P18031 | 1948 | 0.9837 | 0.983 | Enzyme | Phosphatase       |
| Tyrosine-protein phosphatase non-receptor type 11 inhibitor   | Q06124 | 289  | 0.9828 | 0.982 | Enzyme | Phosphatase       |
| Tyrosine-protein phosphatase non-receptor type 12 inhibitor   | Q05209 | 47   | 0.9938 | 0.992 | Enzyme | Phosphatase       |
| Tyrosine-protein phosphatase non-receptor type 13 inhibitor   | Q12923 | 17   | 0.9998 | 1.000 | Enzyme | Phosphatase       |
| Tyrosine-protein phosphatase non-receptor type 2 inhibitor    | P17706 | 376  | 0.9906 | 0.99  | Enzyme | Phosphatase       |
| Tyrosine-protein phosphatase non-receptor type 22 inhibitor   | Q9Y2R2 | 126  | 0.9728 | 0.972 | Enzyme | Phosphatase       |
| Tyrosine-protein phosphatase non-receptor type 5 inhibitor    | P54829 | 83   | 0.9415 | 0.938 | Enzyme | Phosphatase       |
| Tyrosine-protein phosphatase non-receptor type 6 inhibitor    | P29350 | 83   | 0.9723 | 0.971 | Enzyme | Phosphatase       |
| Tyrosine-protein phosphatase non-receptor type 7 inhibitor    | P35236 | 145  | 0.9412 | 0.939 | Enzyme | Phosphatase       |
| Tyrosine-protein phosphatase non-receptor type 9 inhibitor    | P43378 | 19   | 1.000  | 1.000 | Enzyme | Phosphatase       |
| Tyrosine--tRNA ligase, cytoplasmic inhibitor                  | P54577 | 16   | 1.000  | 1.000 | Enzyme | Ligase            |
| Tyrosyl-DNA phosphodiesterase 1 inhibitor                     | Q9NUW8 | 3166 | 0.8903 | 0.889 | Enzyme | Phosphodiesterase |
| Tyrosyl-DNA phosphodiesterase 2 inhibitor                     | O95551 | 181  | 0.9843 | 0.985 | Enzyme | Phosphodiesterase |
| U5 small nuclear ribonucleoprotein 200 kDa helicase inhibitor | O75643 | 24   | 1.000  | 1.000 | Enzyme | Hydrolase         |
| Ubiquitin carboxyl-terminal hydrolase 2 inhibitor             | O75604 | 3144 | 0.9062 | 0.906 | Enzyme | Protease          |
| Ubiquitin carboxyl-terminal hydrolase 25 inhibitor            | Q9UHP3 | 171  | 1.000  | 1.000 | Enzyme | Hydrolase         |
| Ubiquitin carboxyl-terminal hydrolase 28 inhibitor            | Q96RU2 | 204  | 0.9972 | 0.997 | Enzyme | Protease          |

|                                                                                            |        |      |        |       |                      |                                     |
|--------------------------------------------------------------------------------------------|--------|------|--------|-------|----------------------|-------------------------------------|
| Ubiquitin carboxyl-terminal hydrolase 30 inhibitor                                         | Q70CQ3 | 551  | 0.9999 | 1.000 | Enzyme               | Hydrolase                           |
| Ubiquitin carboxyl-terminal hydrolase 47 inhibitor                                         | Q96K76 | 12   | 1.000  | 1.000 | Enzyme               | Protease                            |
| Ubiquitin carboxyl-terminal hydrolase 7 inhibitor                                          | Q93009 | 122  | 0.9922 | 0.992 | Enzyme               | Protease                            |
| Ubiquitin carboxyl-terminal hydrolase isozyme L1 inhibitor                                 | P09936 | 15   | 0.9674 | 0.968 | Enzyme               | Protease                            |
| Ubiquitin-40S ribosomal protein S27a inhibitor                                             | P62979 | 25   | 1.000  | 1.000 | Unclassified protein | NA                                  |
| Ubiquitin-conjugating enzyme E2 N inhibitor                                                | P61088 | 116  | 0.9193 | 0.903 | Enzyme               | Aminoacyltransferase                |
| Ubiquitin-like domain-containing CTD phosphatase 1 inhibitor                               | Q8WVY7 | 8    | 0.9996 | 1.000 | Enzyme               | Phosphatase                         |
| Ubiquitin-like modifier-activating enzyme ATG7 inhibitor                                   | O95352 | 189  | 1.000  | 1.000 | Enzyme               | NA                                  |
| UDP-glucuronosyltransferase 1A1 inhibitor                                                  | P22309 | 10   | 0.9303 | 0.924 | Enzyme               | Transferase                         |
| UDP-glucuronosyltransferase 2B7 inhibitor                                                  | P16662 | 25   | 0.9977 | 0.998 | Enzyme               | Transferase                         |
| UDP-N-acetylglucosamine--peptide N-acetylglucosaminyltransferase 110 kDa subunit inhibitor | O15294 | 17   | 0.9896 | 0.991 | Enzyme               | NA                                  |
| Uracil nucleotide/cysteinyl leukotriene receptor agonist                                   | Q13304 | 34   | 0.9999 | 1.000 | Membrane receptor    | Family A G protein-coupled receptor |
| Uracil nucleotide/cysteinyl leukotriene receptor antagonist                                | Q13304 | 9    | 0.9349 | 0.941 | Membrane receptor    | Family A G protein-coupled receptor |
| Uracil-DNA glycosylase inhibitor                                                           | P13051 | 3    | 0.9992 | 0.999 | Enzyme               | Hydrolase                           |
| Uridine 5'-monophosphate synthase inhibitor                                                | P11172 | 4    | 1.000  | 1.000 | Enzyme               | NA                                  |
| Uridine-cytidine kinase 2 inhibitor                                                        | Q9BZX2 | 3    | 0.9942 | 0.994 | Enzyme               | Transferase                         |
| Urokinase plasminogen activator surface receptor antagonist                                | Q03405 | 31   | 0.9993 | 0.999 | Membrane receptor    | NA                                  |
| Urokinase-type plasminogen activator inhibitor                                             | P00749 | 1012 | 0.9945 | 0.995 | Enzyme               | Protease                            |
| Urotensin-2 receptor agonist                                                               | Q9UKP6 | 103  | 0.9973 | 0.997 | Membrane receptor    | Family A G protein-coupled receptor |
| Urotensin-2 receptor antagonist                                                            | Q9UKP6 | 152  | 0.9933 | 0.993 | Membrane receptor    | Family A G protein-coupled receptor |
| Valine--tRNA ligase inhibitor                                                              | P26640 | 3    | 1.000  | 1.000 | Enzyme               | Ligase                              |
| Vascular cell adhesion protein 1 inhibitor                                                 | P19320 | 50   | 0.9992 | 0.999 | Adhesion             | NA                                  |
| Vascular endothelial growth factor receptor 1 antagonist                                   | P17948 | 894  | 0.9812 | 0.98  | Enzyme               | Kinase                              |
| Vascular endothelial growth factor receptor 2 antagonist                                   | P35968 | 7648 | 0.9735 | 0.973 | Enzyme               | Kinase                              |
| Vascular endothelial growth factor receptor 3 antagonist                                   | P35916 | 482  | 0.9592 | 0.96  | Enzyme               | Kinase                              |
| Vasoactive intestinal polypeptide receptor 1 agonist                                       | P32241 | 13   | 1.000  | 1.000 | Membrane receptor    | Family B G protein-coupled receptor |
| Vasoactive intestinal polypeptide receptor 1 antagonist                                    | P32241 | 3    | 0.9999 | 1.000 | Membrane receptor    | Family B G protein-coupled receptor |
| Vasoactive intestinal polypeptide receptor 2 agonist                                       | P41587 | 27   | 0.9999 | 1.000 | Membrane receptor    | Family B G protein-coupled receptor |

|                                                                     |        |     |        |       |                             |                                                      |
|---------------------------------------------------------------------|--------|-----|--------|-------|-----------------------------|------------------------------------------------------|
| Vasoactive intestinal polypeptide receptor 2 antagonist             | P41587 | 21  | 1.000  | 1.000 | Membrane receptor           | Family B G protein-coupled receptor                  |
| Vasopressin V1a receptor agonist                                    | P37288 | 150 | 0.9914 | 0.992 | Membrane receptor           | Family A G protein-coupled receptor                  |
| Vasopressin V1a receptor antagonist                                 | P37288 | 491 | 0.9964 | 0.996 | Membrane receptor           | Family A G protein-coupled receptor                  |
| Vasopressin V1b receptor agonist                                    | P47901 | 196 | 0.9999 | 1.000 | Membrane receptor           | Family A G protein-coupled receptor                  |
| Vasopressin V1b receptor antagonist                                 | P47901 | 219 | 0.9952 | 0.995 | Membrane receptor           | Family A G protein-coupled receptor                  |
| Vasopressin V2 receptor agonist                                     | P30518 | 299 | 0.9984 | 0.998 | Membrane receptor           | Family A G protein-coupled receptor                  |
| Vasopressin V2 receptor antagonist                                  | P30518 | 257 | 0.9859 | 0.985 | Membrane receptor           | Family A G protein-coupled receptor                  |
| Vesicular acetylcholine transporter inhibitor                       | Q16572 | 102 | 0.9997 | 1.000 | Transporter                 | Electrochemical transporter                          |
| Vitamin D3 receptor agonist                                         | P11473 | 124 | 0.9968 | 0.997 | Transcription factor        | Nuclear receptor                                     |
| Vitamin D3 receptor antagonist                                      | P11473 | 180 | 0.99   | 0.99  | Transcription factor        | Nuclear receptor                                     |
| Vitamin K epoxide reductase complex subunit 1 inhibitor             | Q9BQB6 | 5   | 0.9976 | 0.998 | Enzyme                      | Oxidoreductase                                       |
| Vitamin K-dependent protein C inhibitor                             | P04070 | 106 | 0.9934 | 0.993 | Enzyme                      | Protease                                             |
| Voltage-dependent calcium channel gamma-8 subunit blocker           | Q8WXS5 | 20  | 0.9618 | 0.961 | Auxiliary transport protein | Calcium channel auxiliary subunit gamma family       |
| Voltage-dependent calcium channel subunit alpha-2/delta-1 blocker   | P54289 | 185 | 0.9984 | 0.998 | Auxiliary transport protein | Calcium channel auxiliary subunit alpha2delta family |
| Voltage-dependent calcium channel subunit alpha-2/delta-2 blocker   | Q9NY47 | 25  | 1.000  | 1.000 | Auxiliary transport protein | Calcium channel auxiliary subunit alpha2delta family |
| Voltage-dependent L-type calcium channel subunit alpha-1C blocker   | Q13936 | 235 | 0.9434 | 0.945 | Ion channel                 | Voltage-gated ion channel                            |
| Voltage-dependent L-type calcium channel subunit alpha-1D blocker   | Q01668 | 5   | 0.9994 | 0.999 | Ion channel                 | Voltage-gated ion channel                            |
| Voltage-dependent L-type calcium channel subunit alpha-1S blocker   | Q13698 | 5   | 1.000  | 1.000 | Ion channel                 | Voltage-gated ion channel                            |
| Voltage-dependent N-type calcium channel subunit alpha-1B blocker   | Q00975 | 323 | 0.9906 | 0.991 | Ion channel                 | Voltage-gated ion channel                            |
| Voltage-dependent P/Q-type calcium channel subunit alpha-1A blocker | O00555 | 20  | 0.8895 | 0.89  | Ion channel                 | Voltage-gated ion channel                            |
| Voltage-dependent T-type calcium channel subunit alpha-1G blocker   | O43497 | 494 | 0.9965 | 0.995 | Ion channel                 | Voltage-gated ion channel                            |

|                                                                   |        |     |        |       |                       |                                       |
|-------------------------------------------------------------------|--------|-----|--------|-------|-----------------------|---------------------------------------|
| Voltage-dependent T-type calcium channel subunit alpha-1H blocker | O95180 | 370 | 0.9967 | 0.997 | Ion channel           | Voltage-gated ion channel             |
| Voltage-dependent T-type calcium channel subunit alpha-1I blocker | Q9P0X4 | 239 | 0.9975 | 0.998 | Ion channel           | Voltage-gated ion channel             |
| von Hippel-Lindau disease tumor suppressor inhibitor              | P40337 | 15  | 0.9999 | 1.000 | Unclassified protein  | NA                                    |
| V-type proton ATPase subunit B, kidney isoform inhibitor          | P15313 | 5   | 1.000  | 1.000 | Transporter; Enzyme   | Primary active transporter; Hydrolase |
| WD repeat-containing protein 48 inhibitor                         | Q8TAF3 | 71  | 0.9722 | 0.968 | Epigenetic regulator  | Reader                                |
| WD repeat-containing protein 5 inhibitor                          | P61964 | 168 | 0.9992 | 0.999 | Other nuclear protein | NA                                    |
| Wee1-like protein kinase inhibitor                                | P30291 | 298 | 0.9947 | 0.995 | Enzyme                | Kinase                                |
| Xaa-Pro aminopeptidase 1 inhibitor                                | Q9NQW7 | 4   | 0.9999 | 1.000 | Enzyme                | Protease                              |
| Xaa-Pro aminopeptidase 2 inhibitor                                | O43895 | 8   | 1.000  | 1.000 | Enzyme                | Protease                              |
| Xaa-Pro dipeptidase inhibitor                                     | P12955 | 5   | 0.9925 | 0.993 | Enzyme                | Protease                              |
| Xanthine dehydrogenase/oxidase inhibitor                          | P47989 | 250 | 0.9965 | 0.997 | Enzyme                | Oxidoreductase                        |
| Zinc finger protein GLI1 inhibitor                                | P08151 | 10  | 0.9649 | 0.966 | Transcription factor  | NA                                    |
| Zinc finger protein GLI2 inhibitor                                | P10070 | 5   | 0.9884 | 0.989 | Transcription factor  | NA                                    |

**Number** – number of active compounds; **LOO CV** – leave-one-out cross-validation; **20-Fold CV** – 20-fold cross-validation.
